# Supplementary material for: Long noncoding RNA dysregulation in ischemic heart failure
Source: J Transl Med. 2016 Jun 18;14:183. doi: 10.1186/s12967-016-0926-5 (PMC4912721; doi:10.1186/s12967-016-0926-5)
Supplement: Supplementary file 1 — 10.1186/s12967-016-0926-5 Disease association of the lncRNAs of the SBI "Disease-related human lncRNA profiler" plate. Table S2: Sequences and gene alignment of the primers designed for validation. Table S3: Single nucleotide polymorphism (SNPs) analysis of CDKN2-AS1. Table S4: Differentially expressed protein coding genes neighboring the HF modulated lncRNAs. Table S5: Non end-stage HF LncRNAs signature in end-stage HF patients. Table S6: HF-modulated mRNAs correlating with HF-modulated lncRNAs. Table S7: Pathway enrichment analysis of HF-modulated mRNAs correlating with HF-modulated lncRNAs. Table S8: Significantly enriched pathways in common between LV and PBMC datasets in HF patients. [file 12967_2016_926_MOESM1_ESM.xlsx]

## Sheet: TAB S1
TABLE S1:DISEASE ASSOCIATION OF THE lncRNAs OF THE SBI "DISEASE-RELATED HUMAN lncRNA PROFILER" qPCR PLATE
lncRNA ID	DISEASE/FUNCTION	REF
21A	CANCER	(1)
aHIF	CANCER	(2)
AK023948	CANCER	(3)
CDKN2B-AS1	CORONARY ARTERY DISEASE	(4)
anti-NOS2A	CANCER	(5)
BC017743	CANCER	(6)
BCYRN1)	CANCER	(7)
BCMS (DLEU1)	CANCER	(8)
BIC (MIR155HG)	CANCER	(9)
CCND1 ANCR	CANCER	(10)
CMPD	GENETIC DISORDER	(11)
DD3 (PCA3)	CANCER	(12)
DGCR5	NEUROLOGICAL DISORDERS	(13)
DISC2	NEUROLOGICAL DISORDERS	(14)
DLG2AS (DLG2-AS1)	NEUROLOGICAL DISORDERS	(15)
EGO (EGOT)	CANCER	(16)
GAS5	CANCER	(17)
GOMAFU (MIAT)	MYOCARDIAL INFARCTION/EYE DISEASE	(18,19)
H19	CANCER/CORONARY ARTERY DISEASE	(20–22)
H19-AS	CANCER	(23)
HAR1A	NEUROLOGICAL DISORDERS	(24)
HAR1B	VASCULAR DISEASE	(25)
HOTAIR	CORONARY ARTERY DISEASE /CANCER	(26,27)
HOTAIRM1	CANCER	(28)
HOTTIP	CANCER	(29)
HOXA6AS (HOXA-AS2)	CANCER	(30)
HOXA11AS	CANCER	(31)
HULC	CANCER	(32)
IPW	GENETIC DISORDER	(33)
IGF2AS	CANCER	(34)
KRASP1	CANCER	(35)
L1PA16	CANCER	(36)
LIT (KCNQ1OT1)	MYOCARDIAL INFARCTION/CANCER	(37,38)
LOC285194 (TUSC7)	CANCER	(39)
LUST (JE 2)	CANCER	(40)
LincRNA-VLDLR	CANCER	(41)
MALAT1	DIABETIC CARDIOMYOPATHY/CANCER	(42,43)
MEG3	CANCER/VASCULAR DISEASE	(44,45)
MER11C	CANCER	(36)
NEAT1	CANCER	(46)
NCRMS (RMST)	NEUROGENESIS	(47)
NDM29	CANCER	(48)
PANDA (PANDAR)	SENESCENCE	(49)
PAR5	CANCER	(9)
PCAT-1	CANCER	(50)
PCAT-14	CANCER	(51)
PCAT-29	CANCER	(51)
PCGEM1	CANCER	(52)
PRINS	SKIN DISEASE	(53)
PSF inhibiting RNA	CANCER	(36)
PTENP1	CANCER	(35)
RMRP	GENETIC DISORDER	(54)
ROR	CANCER	(55)
SAF	ANTI-APOPTOTIC	(56)
SCA8	GENETIC DISORDER	(57)
Sox2OT	CANCER	(58)
SRA1	CANCER/MYOBLAST DIFFERENTIATION	(59,60)
ST7OT1	CANCER	(9)
Telomerase RNA (TERRA)	CANCER/SENESCENCE	(61,62)
TMEVPG1 (IFNG-AS1)	T CELL DEVELOPMENT	(63)
TUG1	CANCER	(64)
UCA1	CANCER	(65)
WT1-AS	CANCER	(66)
Y1	CAD	(67)
Y3	CAD	(67)
ZEB2NAT	CANCER	(68)
RN7SK	CARDIAC HYPERTROPHY	(69)

## Sheet: TAB S2
TABLE S2: SEQUENCES AND GENE ALLIGNMENT OF THE PRIMERS DESIGNED FOR VALIDATION
GENE ID	LEFT	RIGHT
7SK	GACATCTGTCACCCCATTGA	GCGCAGCTACTCGTATACCC
BCYRN1 (BC200)	CTGTCCATCCCTTTTCCTCA	ACACCATGAGGCCTGGTAAG
CDKN2B-AS1 (ANRIL)	GCCTCATTCTGATTCAACAGC	GATCTCCCCGGTTTTCTTCT
EGOT	CAGCCCTTCTCCTCCAGGCCAT	ACTGGAGGGTCTGGCCAGGTT
H19	AAGACGCCAGGTCCGGTGGA	CGCAGCCCCACCAGCCTAAG
HOTAIR	AGAGCTTCCAAAGGCTAGGG	GCCTTTCCCTGCTACTTGTG
HOXA11-AS	TCTCCTGGAGTCTCGCATTT	TCGGAAGTGACCATGAATGA
PCGEM1	CAGGGACAGCGGACCCTTTGG	AGTCCTCCACGTGCCTACCCT
RMRP	AAAGTCCCCGGACCTCGGGC	GGGAGCTGACGGATGACGCC
RMST (NCRMS)	CCTTTCCGTATGTGGCCTAA	GAAAATCAATAAAAATGAGCAGAGG
RNY5 (Y5)	GGTCCGAGTGTTGTGGGTTA	GGGGGAGACAATGTTAAATCAA
SOX2-OT	GGTCTTGGAGGCTGGTGTAA	CTCCCTGAGCCTCTTGTCAG
SRA1	TTACAGAGATTAGAACCACATT	CAACTCTTGTTCCCACAGCA
LOC285194 (TUSC7)	TGGCTTTGGCCTGTGCCTGTT	AGTCCCTCCTCCACCTCCCCAA

## Sheet: TAB S3
TABLE S3 SINGLE NUCLEOTIDE POLYMORPHISM (SNP) ANALYSIS OF CDKN2-AS1
ID	RS1333040	RS1333049	RS10757278	RS2383207
	C/C: WT C/T: ET T/T: MUT HapMap-CEU European C/C: 0.195 C/T: 0.496 T/T: 0.310 Exact Multinomial Test: p=0.1337	C/C: WT C/G: ET G/G: MUT HapMap-CEU European C/C: 0.204 C/G: 0.504 G/G: 0.292 Exact Multinomial Test: p=1	A/A: WT A/G: ET G/G: MUT HapMap-CEU European A/A: 0.236 A/G: 0.527 G/G: 0.236 Exact Multinomial Test: p=0.8543	G/G: WT A/A: MUT A/G: ET HapMap-CEU European A/A: 0.257 A/G: 0.522 G/G: 0.221 Exact Multinomial Test: p=0.1044
IDCM_LV_NES #1	n.a.	G/G	n.a.	G/G
IDCM_LV_NES #2	n.a.	n.a.	G/G	A/A
IDCM_LV_NES #3	C/C	G/G	A/A	G/G
IDCM_LV_NES #4	C/T	C/G	A/G	A/G
IDCM_LV_NES #5	C/T	C/C	G/G	G/G
IDCM_LV_NES #6	C/T	C/G	A/G	A/G
IDCM_LV_NES #7	C/T	C/G	A/G	A/G
IDCM_LV_NES #8	C/T	C/G	A/G	A/G
IDCM_LV_NES #9	n.a.	n.a.	A/A	n.a.
IDCM_LV_NES #10	C/C	C/C	A/G	A/G
IDCM_LV_NES #11	n.a.	n.a.	A/A	n.a.
IDCM_LV_NES #12	T/T	n.a.	n.a.	n.a.
IDCM_LV_NES #13	C/T	C/G	n.a.	n.a.
IDCM_LV_NES #14	C/C	G/G	A/A	G/G
IDCM_LV_NES #15	T/T	G/G	n.a.	n.a.
IDCM_LV_NES #16	T/T	n.a.	n.a.	n.a.
IDCM_LV_NES #17	C/C	n.a.	n.a.	n.a.
IDCM_LV_NES #18	C/T	G/G	n.a.	n.a.
IDCM_LV_NES #19	C/T	C/G	n.a.	n.a.
IDCM_LV_NES #20	C/C	C/G	A/G	A/G
IDCM_LV_NES #21	T/T	G/G	G/G	n.a.
IDCM_LV_NES #22	C/C	C/G	n.a.	n.a.
IDCM_LV_NES #23	C/T	C/G	A/G	G/G
IDCM_LV_NES #24	C/T	C/C	G/G	n.a.
IDCM_LV_NES #25	C/C	n.a.	n.a.	G/G
IDCM_LV_NES #26	C/T	C/G	A/G	n.a.
Abbreviations: IDCM_LV_NES=NON END-STAGE POST-ISCHEMIC DILATED CARDIOMYOPAHTY LEFT VENTRICLE; n.a.=not assayed

## Sheet: TAB S4
TABLE S4 DIFFERENTIALLY EXPRESSED PROTEIN CODING GENES ±300Kb UPSTREAM OR DOWNSTREAM THE HF MODULATED lncRNAs
HOTAIR
NEIGHBOURING GENE	SMUG1
FOLD CHANGE	0.86
p	0.00862
7SK
NEIGHBOURING GENE	GSTA4	GSTA5	ICK	FBXO9
FOLD CHANGE	1.42011	1.14	1.65519	0.82
p	0.0076412	0.0399	0.0071604	0.011
RMRP
NEIGHBOURING GENE	TESK1	RUSC2	TMEM8B
FOLD CHANGE	0.709562	0.71	1.16
p	0.0113383	0.00615	0.08
H19
NEIGHBOURING GENE	TNNT3	CTSD
FOLD CHANGE	1.40737	1.4
p	0.0355	0.00485
SRA1
NEIGHBOURING GENE	APBB3	WDR55	HARS	PCDHA7	PCDHA9
FOLD CHANGE	1.54649	0.82	0.71	0.37	0.7
p	0.0031885	0.0166	0.00124	1.9e-06	0.0162
BCYRN1
NEIGHBOURING GENE	EPCAM	MSH2
FOLD CHANGE	1.84	1.38
p	0.0131	0.0224
SOX2-OT
NEIGHBOURING GENE	DNAJC19	FXR1
FOLD CHANGE	1.39668	1.35
p	0.0504341	0.013

## Sheet: TAB S5
TABLE S5: Non-end stage HF LncRNAs signature in end-stage HF patients
lncRNA	FOLD CHANGE	SE	p
RNY5	11.0551	0.439395	**
SOX2-OT	10.1969	0.744993	***
H19	8.6	0.5	***
RMRP	7.64091	0.356415	***
SRA1	4.74587	0.54122	**
CDKN2B-AS1	3.00944	0.323333	*
HOXA11-AS	1.34438	0.876705	ns
7SK	1.17115	0.272386	ns
BCYRN1	-1.83651	0.811666	ns
PCGEM1	-3.01451	1.03997	ns
RMST	-4.08206	0.99226	*
HOTAIR	-9.54285	0.356084	**
LOC285194	-12.0717	1.05237	***
EGOT	-12.1452	0.55017	**

## Sheet: TAB S6
TABLE S6: HF-MODULATED mRNAs CORRELATING WITH HF-MODULATED lncRNAs
lnc-RNA ID	mRNA ID	SPEARMAN'S COEFFICIENT	p-VALUE
BC200	HAO2	1	0.003
BC200	NUP210L	1	0.003
BC200	STAMBPL1	1	0.003
BC200	CALCA	1	0.003
BC200	PPP1CA	1	0.003
BC200	CLEC6A	1	0.003
BC200	HSD17B6	1	0.003
BC200	CUX2	1	0.003
BC200	CDCA3	1	0.003
BC200	SMAGP	1	0.003
BC200	TDRD3	1	0.003
BC200	LRFN5	1	0.003
BC200	MT1H	1	0.003
BC200	OR1A2	1	0.003
BC200	MIF4GD	1	0.003
BC200	OR7C1	1	0.003
BC200	IGKC	1	0.003
BC200	SPINT4	1	0.003
BC200	OXTR	1	0.003
BC200	KIAA1024L	1	0.003
BC200	C6orf97	1	0.003
BC200	C9orf16	1	0.003
BC200	FLJ46836	1	0.003
BC200	SPACA5	1	0.003
NCRMS	RGS7	1	0
NCRMS	OR12D3	1	0
Y5	TMEM220	1	0.003
Y5	OR10H1	1	0.003
Y5	SGK493	1	0.003
Y5	FEZ2	1	0.003
Y5	CHGB	1	0.003
Y5	MRPS36	1	0.003
Y5	NDUFA2	1	0.003
Y5	ASF1A	1	0.003
Y5	C9orf130	1	0.003
Y5	FAM155B	1	0.003
Y5	MBNL3	1	0.003
Y5	VCY	1	0.003
BC200	LOC400804	0.986	0
BC200	ABCC2	0.986	0
BC200	KRTAP5-7	0.986	0
BC200	RPL41	0.986	0
BC200	C12orf12	0.986	0
BC200	NUTF2	0.986	0
BC200	FOXC2	0.986	0
BC200	BRIP1	0.986	0
BC200	CXCL17	0.986	0
BC200	LILRA5	0.986	0
BC200	ICOS	0.986	0
BC200	TYMP	0.986	0
BC200	RNF212	0.986	0
BC200	CYP3A4	0.986	0
NCRMS	CA6	0.986	0
NCRMS	LRRC7	0.986	0
NCRMS	C1orf150	0.986	0
NCRMS	ESPNP	0.986	0
NCRMS	OR6P1	0.986	0
NCRMS	OR6N2	0.986	0
NCRMS	F13B	0.986	0
NCRMS	PM20D1	0.986	0
NCRMS	OR1C1	0.986	0
NCRMS	C10orf90	0.986	0
NCRMS	OR52K1	0.986	0
NCRMS	OR51T1	0.986	0
NCRMS	OR52E4	0.986	0
NCRMS	SPRYD5	0.986	0
NCRMS	OR4C15	0.986	0
NCRMS	SLC22A10	0.986	0
NCRMS	P2RY2	0.986	0
NCRMS	OR10G8	0.986	0
NCRMS	SLC22A18AS	0.986	0
NCRMS	OR52N5	0.986	0
NCRMS	OR52N1	0.986	0
NCRMS	PTH	0.986	0
NCRMS	OR4C46	0.986	0
NCRMS	OR5M10	0.986	0
NCRMS	OR5B2	0.986	0
NCRMS	SPRYD5	0.986	0
NCRMS	CARD17	0.986	0
NCRMS	OR10D4P	0.986	0
NCRMS	OR8B3	0.986	0
NCRMS	MUC19	0.986	0
NCRMS	TMPRSS12	0.986	0
NCRMS	MUCL1	0.986	0
NCRMS	ALX1	0.986	0
NCRMS	C12orf37	0.986	0
NCRMS	GUCY2C	0.986	0
NCRMS	GPR84	0.986	0
NCRMS	HMGA2	0.986	0
NCRMS	LOC100131613	0.986	0
NCRMS	MGAT4C	0.986	0
NCRMS	CCDC38	0.986	0
NCRMS	PMCH	0.986	0
NCRMS	ATP8A2	0.986	0
NCRMS	OR11H4	0.986	0
NCRMS	PRO1768	0.986	0
NCRMS	BDKRB1	0.986	0
NCRMS	C15orf2	0.986	0
NCRMS	OR4F15	0.986	0
NCRMS	POTEB	0.986	0
NCRMS	LASS3	0.986	0
NCRMS	OTOA	0.986	0
NCRMS	AQP8	0.986	0
NCRMS	CNTNAP4	0.986	0
NCRMS	RPL3L	0.986	0
NCRMS	EIF3C	0.986	0
NCRMS	CTRB2	0.986	0
NCRMS	OTOP3	0.986	0
NCRMS	SOX15	0.986	0
NCRMS	HNF1B	0.986	0
NCRMS	CD300E	0.986	0
NCRMS	ASXL3	0.986	0
NCRMS	FLJ25715	0.986	0
NCRMS	C19orf52	0.986	0
NCRMS	OR10H4	0.986	0
NCRMS	ZNF527	0.986	0
NCRMS	BCL2L12	0.986	0
NCRMS	RFPL4A	0.986	0
NCRMS	PLAC2	0.986	0
NCRMS	NR2F6	0.986	0
NCRMS	GRIK5	0.986	0
NCRMS	CTNNA2	0.986	0
NCRMS	SCN2A	0.986	0
NCRMS	CPO	0.986	0
NCRMS	PTH2R	0.986	0
NCRMS	KIAA1486	0.986	0
NCRMS	UBTFL2	0.986	0
NCRMS	SCN1A	0.986	0
NCRMS	C2orf77	0.986	0
NCRMS	DEFB128	0.986	0
NCRMS	C21orf99	0.986	0
NCRMS	C21orf82	0.986	0
NCRMS	P704P	0.986	0
NCRMS	ARVCF	0.986	0
NCRMS	SMC1B	0.986	0
NCRMS	OR5H15	0.986	0
NCRMS	TM4SF4	0.986	0
NCRMS	TRAIP	0.986	0
NCRMS	PROK2	0.986	0
NCRMS	RBP1	0.986	0
NCRMS	CLRN1	0.986	0
NCRMS	ZBBX	0.986	0
NCRMS	LRRC31	0.986	0
NCRMS	RPL39L	0.986	0
NCRMS	CLRN2	0.986	0
NCRMS	UGT2A3	0.986	0
NCRMS	GDEP	0.986	0
NCRMS	ADAD1	0.986	0
NCRMS	ADAM29	0.986	0
NCRMS	UCP1	0.986	0
NCRMS	PDGFC	0.986	0
NCRMS	LOC391742	0.986	0
NCRMS	GPR98	0.986	0
NCRMS	ADAMTS6	0.986	0
NCRMS	LOC644714	0.986	0
NCRMS	OR2J1	0.986	0
NCRMS	MEP1A	0.986	0
NCRMS	C6orf57	0.986	0
NCRMS	KCNQ5	0.986	0
NCRMS	SPACA1	0.986	0
NCRMS	PRL	0.986	0
NCRMS	PKHD1	0.986	0
NCRMS	GSTA3	0.986	0
NCRMS	FAM54A	0.986	0
NCRMS	ABCA13	0.986	0
NCRMS	CFTR	0.986	0
NCRMS	AGAP3	0.986	0
NCRMS	RNF32	0.986	0
NCRMS	KIAA0087	0.986	0
NCRMS	ZPBP	0.986	0
NCRMS	SLC26A5	0.986	0
NCRMS	ADAM7	0.986	0
NCRMS	RP1	0.986	0
NCRMS	CHMP4C	0.986	0
NCRMS	CNBD1	0.986	0
NCRMS	PSCA	0.986	0
NCRMS	DEFB1	0.986	0
NCRMS	LOC442381	0.986	0
NCRMS	CALB1	0.986	0
NCRMS	FLJ43859	0.986	0
NCRMS	RP11-35N6.1	0.986	0
NCRMS	OR13D1	0.986	0
NCRMS	OR1Q1	0.986	0
NCRMS	FAM74A3	0.986	0
NCRMS	C9orf27	0.986	0
NCRMS	KIF4A	0.986	0
NCRMS	SLC6A14	0.986	0
NCRMS	HSFY2	0.986	0
NCRMS	PMCHL2	0.986	0
NCRMS	OR2B3	0.986	0
NCRMS	OR11A1	0.986	0
Y5	HDGF	0.986	0
Y5	FAM21C	0.986	0
Y5	C10orf118	0.986	0
Y5	FAM82A2	0.986	0
Y5	PSMC4	0.986	0
Y5	TMX4	0.986	0
Y5	C6orf211	0.986	0
Y5	GDPD2	0.986	0
Y5	ZNF185	0.986	0
BC200	GPR81	0.971	0.001
NCRMS	OR52N2	0.971	0.001
NCRMS	hCG_2020170	0.971	0.001
NCRMS	GSG2	0.971	0.001
NCRMS	HS3ST3A1	0.971	0.001
NCRMS	LOC100131170	0.971	0.001
NCRMS	SUV420H2	0.971	0.001
NCRMS	RUFY4	0.971	0.001
NCRMS	WNT10A	0.971	0.001
NCRMS	UNQ3029	0.971	0.001
NCRMS	FLJ32756	0.971	0.001
NCRMS	CHCHD6	0.971	0.001
NCRMS	FETUB	0.971	0.001
NCRMS	DIMT1L	0.971	0.001
NCRMS	OR9A4	0.971	0.001
NCRMS	ADAMDEC1	0.971	0.001
NCRMS	IFNA17	0.971	0.001
Y5	STMN1	0.971	0.001
NCRMS	MFSD2	0.956	0.003
NCRMS	COL11A1	0.956	0.003
NCRMS	P2RX2	0.956	0.003
NCRMS	OR4F15	0.956	0.003
NCRMS	GPCRLTM7	0.956	0.003
NCRMS	UTS2R	0.956	0.003
NCRMS	TTLL12	0.956	0.003
NCRMS	TRIM75	0.956	0.003
NCRMS	OR1L4	0.956	0.003
NCRMS	DSG4	0.955	0.003
HOTAIR	BEND3	0.944	0
BC200	FNDC7	0.943	0.017
BC200	OR6K6	0.943	0.017
BC200	MNDA	0.943	0.017
BC200	FCRLB	0.943	0.017
BC200	FMO6P	0.943	0.017
BC200	NENF	0.943	0.017
BC200	OR2G3	0.943	0.017
BC200	UBXN11	0.943	0.017
BC200	C1orf102	0.943	0.017
BC200	CD5L	0.943	0.017
BC200	PDC	0.943	0.017
BC200	SLC39A12	0.943	0.017
BC200	C10orf96	0.943	0.017
BC200	TUBAL3	0.943	0.017
BC200	C1QL3	0.943	0.017
BC200	LYZL2	0.943	0.017
BC200	RPL21	0.943	0.017
BC200	NLRP14	0.943	0.017
BC200	OR4B1	0.943	0.017
BC200	OR4S1	0.943	0.017
BC200	RAB39	0.943	0.017
BC200	KCNJ5	0.943	0.017
BC200	OR51B4	0.943	0.017
BC200	OR56A5	0.943	0.017
BC200	OR6A2	0.943	0.017
BC200	OR5T2	0.943	0.017
BC200	SLC22A8	0.943	0.017
BC200	MMP7	0.943	0.017
BC200	ACRV1	0.943	0.017
BC200	CLEC12A	0.943	0.017
BC200	OR2AP1	0.943	0.017
BC200	SLC15A5	0.943	0.017
BC200	LOC400061	0.943	0.017
BC200	USP44	0.943	0.017
BC200	MGC14436	0.943	0.017
BC200	C13orf26	0.943	0.017
BC200	OR4K17	0.943	0.017
BC200	MRPL52	0.943	0.017
BC200	GPR65	0.943	0.017
BC200	CRIP1	0.943	0.017
BC200	GPR135	0.943	0.017
BC200	C14orf148	0.943	0.017
BC200	CKMT1A	0.943	0.017
BC200	C15orf43	0.943	0.017
BC200	ADAM6	0.943	0.017
BC200	LYSMD2	0.943	0.017
BC200	TSPAN3	0.943	0.017
BC200	MT1L	0.943	0.017
BC200	THAP11	0.943	0.017
BC200	ZNF843	0.943	0.017
BC200	OR4D1	0.943	0.017
BC200	SCARNA16	0.943	0.017
BC200	KRTAP4-5	0.943	0.017
BC200	RPL7P48	0.943	0.017
BC200	TTR	0.943	0.017
BC200	hCG_1659830	0.943	0.017
BC200	ATP5D	0.943	0.017
BC200	OR7D2	0.943	0.017
BC200	ZNF578	0.943	0.017
BC200	RFPL4A	0.943	0.017
BC200	FCER2	0.943	0.017
BC200	ZNF737	0.943	0.017
BC200	CEACAM8	0.943	0.017
BC200	KLK6	0.943	0.017
BC200	DQX1	0.943	0.017
BC200	LRRTM4	0.943	0.017
BC200	LOC729898	0.943	0.017
BC200	SIRPG	0.943	0.017
BC200	POTED	0.943	0.017
BC200	C21orf2	0.943	0.017
BC200	KRTAP10-10	0.943	0.017
BC200	LOC284900	0.943	0.017
BC200	LIF	0.943	0.017
BC200	OR5AC2	0.943	0.017
BC200	ARGFX	0.943	0.017
BC200	SELT	0.943	0.017
BC200	RPL24	0.943	0.017
BC200	ATP13A5	0.943	0.017
BC200	HSP90AB2P	0.943	0.017
BC200	CHRNA9	0.943	0.017
BC200	UGT2B10	0.943	0.017
BC200	IL8	0.943	0.017
BC200	IL2	0.943	0.017
BC200	SFRP2	0.943	0.017
BC200	GLRA3	0.943	0.017
BC200	SPINK7	0.943	0.017
BC200	GABRG2	0.943	0.017
BC200	HIGD2A	0.943	0.017
BC200	OR4F16	0.943	0.017
BC200	HEATR7B2	0.943	0.017
BC200	DEPDC1B	0.943	0.017
BC200	TTK	0.943	0.017
BC200	OPRM1	0.943	0.017
BC200	OFCC1	0.943	0.017
BC200	C6orf1	0.943	0.017
BC200	SLC26A8	0.943	0.017
BC200	ELOVL4	0.943	0.017
BC200	TAAR3	0.943	0.017
BC200	PRR18	0.943	0.017
BC200	IDO2	0.943	0.017
BC200	DEFB4	0.943	0.017
BC200	RNF5P1	0.943	0.017
BC200	MLANA	0.943	0.017
BC200	TMEFF1	0.943	0.017
BC200	RPS2P35	0.943	0.017
BC200	OR13C3	0.943	0.017
BC200	TLR8	0.943	0.017
BC200	S100G	0.943	0.017
BC200	MAGEB6B	0.943	0.017
BC200	CXorf22	0.943	0.017
BC200	ZIC3	0.943	0.017
BC200	USP26	0.943	0.017
BC200	CT45A6	0.943	0.017
BC200	GABRA3	0.943	0.017
BC200	DNASE1L1	0.943	0.017
BC200	OR14J1	0.943	0.017
Y5	TINAGL1	0.943	0.017
Y5	IFI6	0.943	0.017
Y5	NEGR1	0.943	0.017
Y5	KCNA3	0.943	0.017
Y5	PYCR2	0.943	0.017
Y5	C1orf229	0.943	0.017
Y5	C10orf84	0.943	0.017
Y5	PRDM11	0.943	0.017
Y5	PACSIN3	0.943	0.017
Y5	DCUN1D5	0.943	0.017
Y5	TIMM8B	0.943	0.017
Y5	COPS7A	0.943	0.017
Y5	OS9	0.943	0.017
Y5	OAS1	0.943	0.017
Y5	BCL7A	0.943	0.017
Y5	C12orf65	0.943	0.017
Y5	M6PR	0.943	0.017
Y5	SAP18	0.943	0.017
Y5	WASF3	0.943	0.017
Y5	ABCC4	0.943	0.017
Y5	MIPOL1	0.943	0.017
Y5	GCH1	0.943	0.017
Y5	RPS6KL1	0.943	0.017
Y5	C15orf33	0.943	0.017
Y5	ARHGDIG	0.943	0.017
Y5	CYB5B	0.943	0.017
Y5	ZNF778	0.943	0.017
Y5	LYRM2	0.943	0.017
Y5	ACAP1	0.943	0.017
Y5	NKIRAS2	0.943	0.017
Y5	BAIAP2	0.943	0.017
Y5	CCDC43	0.943	0.017
Y5	ELAC1	0.943	0.017
Y5	FEM1A	0.943	0.017
Y5	VAV1	0.943	0.017
Y5	APLP1	0.943	0.017
Y5	PLEKHJ1	0.943	0.017
Y5	KCNIP3	0.943	0.017
Y5	C2orf68	0.943	0.017
Y5	MDH1B	0.943	0.017
Y5	MX2	0.943	0.017
Y5	MX1	0.943	0.017
Y5	C21orf105	0.943	0.017
Y5	SGSM3	0.943	0.017
Y5	ARL8B	0.943	0.017
Y5	TCTA	0.943	0.017
Y5	PARP15	0.943	0.017
Y5	PSMD6	0.943	0.017
Y5	EIF4E3	0.943	0.017
Y5	PFN2	0.943	0.017
Y5	MRPL1	0.943	0.017
Y5	TAPT1	0.943	0.017
Y5	RAB3C	0.943	0.017
Y5	AMACR	0.943	0.017
Y5	HARS	0.943	0.017
Y5	PRELID2	0.943	0.017
Y5	GMPR	0.943	0.017
Y5	PCMT1	0.943	0.017
Y5	NEDD9	0.943	0.017
Y5	ITGB8	0.943	0.017
Y5	TAX1BP1	0.943	0.017
Y5	MRPL32	0.943	0.017
Y5	INTS4L1	0.943	0.017
Y5	SHFM1	0.943	0.017
Y5	MUC3A	0.943	0.017
Y5	FLJ36840	0.943	0.017
Y5	CHCHD7	0.943	0.017
Y5	OTUD6B	0.943	0.017
Y5	METTL11A	0.943	0.017
Y5	AIF1L	0.943	0.017
Y5	IFNA21	0.943	0.017
Y5	ALDH1A1	0.943	0.017
Y5	CHIC1	0.943	0.017
Y5	ZNF275	0.943	0.017
Y5	PNPLA4	0.943	0.017
Y5	SYP	0.943	0.017
Y5	RING1	0.943	0.017
SOX2OT	SILV	0.942	0
BC200	RAVER1	0.941	0.005
BC200	CTNNAL1	0.941	0.005
NCRMS	HABP2	0.941	0.005
NCRMS	TBC1D3B	0.941	0.005
NCRMS	NEUROD1	0.941	0.005
NCRMS	TFF2	0.941	0.005
NCRMS	AFM	0.941	0.005
NCRMS	FGG	0.941	0.005
NCRMS	SCGB3A2	0.941	0.005
NCRMS	C6orf50	0.941	0.005
NCRMS	LOC93432	0.941	0.005
NCRMS	TRYX3	0.941	0.005
NCRMS	LOC100129876	0.941	0.005
Y5	CCDC115	0.941	0.005
H19	FLJ44635	0.93	0
SOX2OT	LTA	0.93	0
BC200	CD52	0.928	0.008
BC200	TESK2	0.928	0.008
BC200	YOD1	0.928	0.008
BC200	OR7E87P	0.928	0.008
BC200	DKFZp434E1119	0.928	0.008
BC200	ZMYM2	0.928	0.008
BC200	LOC100129884	0.928	0.008
BC200	GAMT	0.928	0.008
BC200	MFF	0.928	0.008
BC200	SPC25	0.928	0.008
BC200	DIMT1L	0.928	0.008
BC200	IL22RA2	0.928	0.008
BC200	NUB1	0.928	0.008
BC200	RNU12	0.928	0.008
NCRMS	PUSL1	0.928	0.008
NCRMS	TAS1R3	0.928	0.008
NCRMS	C1orf228	0.928	0.008
NCRMS	ZYG11A	0.928	0.008
NCRMS	PDZK1	0.928	0.008
NCRMS	C1orf230	0.928	0.008
NCRMS	RXFP4	0.928	0.008
NCRMS	FCRLB	0.928	0.008
NCRMS	C1orf129	0.928	0.008
NCRMS	RPS27A	0.928	0.008
NCRMS	IL20	0.928	0.008
NCRMS	FAM71A	0.928	0.008
NCRMS	OR2L2	0.928	0.008
NCRMS	OR2M5	0.928	0.008
NCRMS	OR2M4	0.928	0.008
NCRMS	PRAMEF5	0.928	0.008
NCRMS	SLFNL1	0.928	0.008
NCRMS	LOC128192	0.928	0.008
NCRMS	ABCA4	0.928	0.008
NCRMS	PPIAL4B	0.928	0.008
NCRMS	OR6K3	0.928	0.008
NCRMS	OR10J3	0.928	0.008
NCRMS	TEDDM1	0.928	0.008
NCRMS	DENND1B	0.928	0.008
NCRMS	HHIPL2	0.928	0.008
NCRMS	OR6F1	0.928	0.008
NCRMS	SLC39A12	0.928	0.008
NCRMS	GPR158	0.928	0.008
NCRMS	LIPJ	0.928	0.008
NCRMS	CYP2C9	0.928	0.008
NCRMS	LBX1	0.928	0.008
NCRMS	LOC387720	0.928	0.008
NCRMS	OR56A3	0.928	0.008
NCRMS	OR52W1	0.928	0.008
NCRMS	OR2D3	0.928	0.008
NCRMS	NLRP14	0.928	0.008
NCRMS	KCNC1	0.928	0.008
NCRMS	LDHAL6A	0.928	0.008
NCRMS	FSHB	0.928	0.008
NCRMS	FLJ41423	0.928	0.008
NCRMS	OR4A16	0.928	0.008
NCRMS	OR4C16	0.928	0.008
NCRMS	OR9G1	0.928	0.008
NCRMS	C11orf66	0.928	0.008
NCRMS	SPDYC	0.928	0.008
NCRMS	FOLR4	0.928	0.008
NCRMS	KCNJ5	0.928	0.008
NCRMS	IFITM5	0.928	0.008
NCRMS	OR52A4	0.928	0.008
NCRMS	OR52A1	0.928	0.008
NCRMS	OR51V1	0.928	0.008
NCRMS	HBG1	0.928	0.008
NCRMS	OR51B2	0.928	0.008
NCRMS	OR56A1	0.928	0.008
NCRMS	OR5R1	0.928	0.008
NCRMS	OR10W1	0.928	0.008
NCRMS	GIF	0.928	0.008
NCRMS	VWCE	0.928	0.008
NCRMS	SLC22A8	0.928	0.008
NCRMS	CCND1	0.928	0.008
NCRMS	RAB38	0.928	0.008
NCRMS	TRIM48	0.928	0.008
NCRMS	MMP10	0.928	0.008
NCRMS	MMP3	0.928	0.008
NCRMS	CASP5	0.928	0.008
NCRMS	BTG4	0.928	0.008
NCRMS	RAD51AP1	0.928	0.008
NCRMS	CD27	0.928	0.008
NCRMS	CLEC12A	0.928	0.008
NCRMS	KIF5A	0.928	0.008
NCRMS	PIWIL1	0.928	0.008
NCRMS	SPSB2	0.928	0.008
NCRMS	CD69	0.928	0.008
NCRMS	STYK1	0.928	0.008
NCRMS	C12orf67	0.928	0.008
NCRMS	RAPGEF3	0.928	0.008
NCRMS	ASB8	0.928	0.008
NCRMS	CELA1	0.928	0.008
NCRMS	KRT73	0.928	0.008
NCRMS	SP7	0.928	0.008
NCRMS	GTSF1	0.928	0.008
NCRMS	IL26	0.928	0.008
NCRMS	SLC6A15	0.928	0.008
NCRMS	MGC14436	0.928	0.008
NCRMS	TESC	0.928	0.008
NCRMS	PABPC3	0.928	0.008
NCRMS	CPB2	0.928	0.008
NCRMS	P704P	0.928	0.008
NCRMS	OR4L1	0.928	0.008
NCRMS	OR4K17	0.928	0.008
NCRMS	CPNE6	0.928	0.008
NCRMS	FOXG1	0.928	0.008
NCRMS	STELLAR	0.928	0.008
NCRMS	FLJ43390	0.928	0.008
NCRMS	C14orf50	0.928	0.008
NCRMS	TSHR	0.928	0.008
NCRMS	PPP4R4	0.928	0.008
NCRMS	OR4K14	0.928	0.008
NCRMS	RNASE9	0.928	0.008
NCRMS	NKX2-1	0.928	0.008
NCRMS	GPR135	0.928	0.008
NCRMS	C14orf148	0.928	0.008
NCRMS	CHST14	0.928	0.008
NCRMS	CKMT1A	0.928	0.008
NCRMS	SCG3	0.928	0.008
NCRMS	UNC13C	0.928	0.008
NCRMS	LDHAL6B	0.928	0.008
NCRMS	NR2E3	0.928	0.008
NCRMS	SH3GL3	0.928	0.008
NCRMS	GOLGA8G	0.928	0.008
NCRMS	RPL4	0.928	0.008
NCRMS	GOLGA8G	0.928	0.008
NCRMS	HSD17B2	0.928	0.008
NCRMS	IL17C	0.928	0.008
NCRMS	VN1R3	0.928	0.008
NCRMS	hCG_24312	0.928	0.008
NCRMS	C16orf85	0.928	0.008
NCRMS	PPP1R1B	0.928	0.008
NCRMS	KRTAP9-8	0.928	0.008
NCRMS	KRTAP9-4	0.928	0.008
NCRMS	MAP3K14	0.928	0.008
NCRMS	ABCC3	0.928	0.008
NCRMS	CACNG5	0.928	0.008
NCRMS	KCNJ16	0.928	0.008
NCRMS	GPR172B	0.928	0.008
NCRMS	SLC16A11	0.928	0.008
NCRMS	KRTAP4-5	0.928	0.008
NCRMS	GHDC	0.928	0.008
NCRMS	ATAD4	0.928	0.008
NCRMS	RNF213	0.928	0.008
NCRMS	TXNDC2	0.928	0.008
NCRMS	TTR	0.928	0.008
NCRMS	DCC	0.928	0.008
NCRMS	ZNF396	0.928	0.008
NCRMS	SERPINB3	0.928	0.008
NCRMS	C18orf62	0.928	0.008
NCRMS	MADCAM1	0.928	0.008
NCRMS	MBD3L2	0.928	0.008
NCRMS	C19orf59	0.928	0.008
NCRMS	OR7E24	0.928	0.008
NCRMS	CLEC17A	0.928	0.008
NCRMS	OR10H5	0.928	0.008
NCRMS	NCCRP1	0.928	0.008
NCRMS	GRIN2D	0.928	0.008
NCRMS	KLK3	0.928	0.008
NCRMS	VN1R2	0.928	0.008
NCRMS	RFPL4A	0.928	0.008
NCRMS	EMR4P	0.928	0.008
NCRMS	FCER2	0.928	0.008
NCRMS	OR7D4	0.928	0.008
NCRMS	OR7A2P	0.928	0.008
NCRMS	INSL3	0.928	0.008
NCRMS	CEACAM8	0.928	0.008
NCRMS	IRF3	0.928	0.008
NCRMS	KLK5	0.928	0.008
NCRMS	KLK6	0.928	0.008
NCRMS	KLK12	0.928	0.008
NCRMS	KIR2DS2	0.928	0.008
NCRMS	KIR2DS1	0.928	0.008
NCRMS	LOC650157	0.928	0.008
NCRMS	LOC388965	0.928	0.008
NCRMS	SH2D6	0.928	0.008
NCRMS	LOC440888	0.928	0.008
NCRMS	TMEM169	0.928	0.008
NCRMS	CCDC140	0.928	0.008
NCRMS	CHRND	0.928	0.008
NCRMS	LRRFIP1	0.928	0.008
NCRMS	SRD5A2	0.928	0.008
NCRMS	TSPYL6	0.928	0.008
NCRMS	DQX1	0.928	0.008
NCRMS	TRIM43	0.928	0.008
NCRMS	IL1F8	0.928	0.008
NCRMS	NXPH2	0.928	0.008
NCRMS	LRP2	0.928	0.008
NCRMS	CRYGD	0.928	0.008
NCRMS	ABCA12	0.928	0.008
NCRMS	MREG	0.928	0.008
NCRMS	SLC19A3	0.928	0.008
NCRMS	LOC729898	0.928	0.008
NCRMS	SNAP25	0.928	0.008
NCRMS	BANF2	0.928	0.008
NCRMS	CST8	0.928	0.008
NCRMS	LBP	0.928	0.008
NCRMS	LOC284751	0.928	0.008
NCRMS	SIRPG	0.928	0.008
NCRMS	SLPI	0.928	0.008
NCRMS	ZBP1	0.928	0.008
NCRMS	RP11-93B14.6	0.928	0.008
NCRMS	KRTAP13-1	0.928	0.008
NCRMS	KRTAP10-10	0.928	0.008
NCRMS	KRTAP12-3	0.928	0.008
NCRMS	C21orf57	0.928	0.008
NCRMS	KRTAP19-5	0.928	0.008
NCRMS	KRTAP19-6	0.928	0.008
NCRMS	DSCR4	0.928	0.008
NCRMS	FLJ26056	0.928	0.008
NCRMS	MEI1	0.928	0.008
NCRMS	MAPK8IP2	0.928	0.008
NCRMS	GAB4	0.928	0.008
NCRMS	C22orf31	0.928	0.008
NCRMS	CNTN6	0.928	0.008
NCRMS	GPR15	0.928	0.008
NCRMS	ZPLD1	0.928	0.008
NCRMS	C3orf15	0.928	0.008
NCRMS	ARGFX	0.928	0.008
NCRMS	C3orf47	0.928	0.008
NCRMS	SELT	0.928	0.008
NCRMS	C3orf48	0.928	0.008
NCRMS	C3orf39	0.928	0.008
NCRMS	KIAA1257	0.928	0.008
NCRMS	TMEM14E	0.928	0.008
NCRMS	SI	0.928	0.008
NCRMS	ZDHHC19	0.928	0.008
NCRMS	HSP90AB2P	0.928	0.008
NCRMS	UGT2B28	0.928	0.008
NCRMS	STATH	0.928	0.008
NCRMS	PROL1	0.928	0.008
NCRMS	AMBN	0.928	0.008
NCRMS	CXCL1	0.928	0.008
NCRMS	BMP3	0.928	0.008
NCRMS	IBSP	0.928	0.008
NCRMS	GRIA2	0.928	0.008
NCRMS	LOC728220	0.928	0.008
NCRMS	UGT2A3	0.928	0.008
NCRMS	C4orf11	0.928	0.008
NCRMS	IL2	0.928	0.008
NCRMS	C4orf49	0.928	0.008
NCRMS	ADAMTS16	0.928	0.008
NCRMS	HSPB3	0.928	0.008
NCRMS	C5orf27	0.928	0.008
NCRMS	SPINK6	0.928	0.008
NCRMS	HEATR7B2	0.928	0.008
NCRMS	ACTBL2	0.928	0.008
NCRMS	HINT1	0.928	0.008
NCRMS	LECT2	0.928	0.008
NCRMS	UNQ9374	0.928	0.008
NCRMS	DRD1	0.928	0.008
NCRMS	FAM26D	0.928	0.008
NCRMS	TAAR9	0.928	0.008
NCRMS	OPRM1	0.928	0.008
NCRMS	RP3-398D13.1	0.928	0.008
NCRMS	SLC17A1	0.928	0.008
NCRMS	SLC17A2	0.928	0.008
NCRMS	LOC439938	0.928	0.008
NCRMS	SLC26A8	0.928	0.008
NCRMS	C6orf138	0.928	0.008
NCRMS	RHAG	0.928	0.008
NCRMS	B3GAT2	0.928	0.008
NCRMS	IGFBP1	0.928	0.008
NCRMS	ZNF479	0.928	0.008
NCRMS	ZNF679	0.928	0.008
NCRMS	BHLHA15	0.928	0.008
NCRMS	SPDYE3	0.928	0.008
NCRMS	MACC1	0.928	0.008
NCRMS	AAA1	0.928	0.008
NCRMS	HEPACAM2	0.928	0.008
NCRMS	FLJ42280	0.928	0.008
NCRMS	ACHE	0.928	0.008
NCRMS	ASZ1	0.928	0.008
NCRMS	RNF133	0.928	0.008
NCRMS	LOC401410	0.928	0.008
NCRMS	ZNF705D	0.928	0.008
NCRMS	POTEA	0.928	0.008
NCRMS	HNF4G	0.928	0.008
NCRMS	GRHL2	0.928	0.008
NCRMS	RIMS2	0.928	0.008
NCRMS	TG	0.928	0.008
NCRMS	CSMD1	0.928	0.008
NCRMS	DEFB105A	0.928	0.008
NCRMS	DEF109P1B	0.928	0.008
NCRMS	CSMD3	0.928	0.008
NCRMS	C8orf78	0.928	0.008
NCRMS	OC90	0.928	0.008
NCRMS	INSL4	0.928	0.008
NCRMS	IL11RA	0.928	0.008
NCRMS	FOXB2	0.928	0.008
NCRMS	OR1L1	0.928	0.008
NCRMS	OR1K1	0.928	0.008
NCRMS	ADAMTS13	0.928	0.008
NCRMS	CER1	0.928	0.008
NCRMS	IFNA4	0.928	0.008
NCRMS	ENHO	0.928	0.008
NCRMS	RNF183	0.928	0.008
NCRMS	OR1L8	0.928	0.008
NCRMS	LOC440552	0.928	0.008
NCRMS	MAGEB6B	0.928	0.008
NCRMS	FLJ32742	0.928	0.008
NCRMS	CXorf22	0.928	0.008
NCRMS	OTUD6A	0.928	0.008
NCRMS	TNMD	0.928	0.008
NCRMS	BEND2	0.928	0.008
NCRMS	RP11-278E11.2	0.928	0.008
NCRMS	DNASE1L1	0.928	0.008
NCRMS	RBMY1E	0.928	0.008
NCRMS	RBMY1B	0.928	0.008
NCRMS	RBMY1A1	0.928	0.008
NCRMS	OR10C1	0.928	0.008
NCRMS	LY6G6C	0.928	0.008
SOX2OT	ROBO2	0.928	0
Y5	IL6R	0.928	0.008
Y5	PBLD	0.928	0.008
Y5	C11orf73	0.928	0.008
Y5	RNF141	0.928	0.008
Y5	ANKRD13A	0.928	0.008
Y5	ITPR2	0.928	0.008
Y5	GMPR2	0.928	0.008
Y5	SRR	0.928	0.008
Y5	MRPL4	0.928	0.008
Y5	DDA1	0.928	0.008
Y5	RPS9	0.928	0.008
Y5	ING5	0.928	0.008
Y5	ROCK2	0.928	0.008
Y5	RETSAT	0.928	0.008
Y5	APOBEC3D	0.928	0.008
Y5	DMC1	0.928	0.008
Y5	FAM92A3	0.928	0.008
Y5	CAPZA2	0.928	0.008
Y5	CDC26	0.928	0.008
Y5	HINT2	0.928	0.008
Y5	NGFRAP1	0.928	0.008
Y5	HDX	0.928	0.008
Y5	GAB3	0.928	0.008
LOC285194	SPINK4	0.927	0
HOXA11AS	ACAP1	0.926	0
NCRMS	CYP2C19	0.925	0.008
NCRMS	TMEM225	0.924	0.008
H19	WISP1	0.923	0
HOXA11AS	DRP2	0.923	0
SOX2OT	DKFZP434L187	0.916	0
SOX2OT	KCNG4	0.916	0
SOX2OT	ADH7	0.914	0
SOX2OT	OR2AE1	0.914	0
ANRIL	GNB4	0.912	0
BC200	TMEM44	0.912	0.011
H19	CDYL2	0.912	0
NCRMS	MMP23B	0.912	0.011
NCRMS	TSPAN1	0.912	0.011
NCRMS	SCGB2A1	0.912	0.011
NCRMS	OR11H6	0.912	0.011
NCRMS	MESDC1	0.912	0.011
NCRMS	C17orf59	0.912	0.011
NCRMS	KISS1R	0.912	0.011
NCRMS	LOC284297	0.912	0.011
NCRMS	KLK8	0.912	0.011
NCRMS	NCRNA00164	0.912	0.011
NCRMS	NIPAL4	0.912	0.011
NCRMS	HIST1H3G	0.912	0.011
NCRMS	WDR86	0.912	0.011
NCRMS	IFNA13	0.912	0.011
Y5	NDUFAF3	0.912	0.011
Y5	DNAJC21	0.912	0.011
SOX2OT	ADAM8	0.911	0
HOXA11AS	C20orf54	0.909	0
SOX2OT	IL12RB1	0.907	0
HOTAIR	SNORA42	0.906	0
HOTAIR	ACMSD	0.906	0
ANRIL	HIST2H3A	0.905	0
ANRIL	AIM1	0.903	0
H19	HMMR	0.902	0
SOX2OT	FAM12A	0.902	0
H19	GDPD5	0.9	0
SOX2OT	DBX2	0.9	0
BC200	MMP23B	0.899	0.015
BC200	CCNYL2	0.899	0.015
BC200	SCGB2A1	0.899	0.015
BC200	COTL1	0.899	0.015
BC200	C17orf59	0.899	0.015
BC200	LOC100130794	0.899	0.015
BC200	PTGER1	0.899	0.015
BC200	C2orf73	0.899	0.015
BC200	IL1B	0.899	0.015
BC200	NCRNA00164	0.899	0.015
BC200	TFF2	0.899	0.015
BC200	PRAME	0.899	0.015
BC200	RPS26	0.899	0.015
BC200	FGG	0.899	0.015
BC200	SCGB3A2	0.899	0.015
BC200	TRIM36	0.899	0.015
BC200	GSDMD	0.899	0.015
BC200	IFNA5	0.899	0.015
BC200	BAAT	0.899	0.015
NCRMS	CLCA2	0.899	0.015
NCRMS	OR10K1	0.899	0.015
NCRMS	OR10R2	0.899	0.015
NCRMS	OR6K6	0.899	0.015
NCRMS	TDRD5	0.899	0.015
NCRMS	C1orf120	0.899	0.015
NCRMS	OR2G3	0.899	0.015
NCRMS	OR2L8	0.899	0.015
NCRMS	PAP2D	0.899	0.015
NCRMS	CD5L	0.899	0.015
NCRMS	OR6Y1	0.899	0.015
NCRMS	PDC	0.899	0.015
NCRMS	OR14A16	0.899	0.015
NCRMS	OR2T12	0.899	0.015
NCRMS	TCEB1P3	0.899	0.015
NCRMS	DNTT	0.899	0.015
NCRMS	PNLIPRP3	0.899	0.015
NCRMS	EMX2	0.899	0.015
NCRMS	LOC100128356	0.899	0.015
NCRMS	TMEM26	0.899	0.015
NCRMS	OR51L1	0.899	0.015
NCRMS	HBG2	0.899	0.015
NCRMS	NELL1	0.899	0.015
NCRMS	OR4C46	0.899	0.015
NCRMS	OR5D13	0.899	0.015
NCRMS	OR5D16	0.899	0.015
NCRMS	ROM1	0.899	0.015
NCRMS	RAB39	0.899	0.015
NCRMS	OR10G9	0.899	0.015
NCRMS	POLR2L	0.899	0.015
NCRMS	OR51G1	0.899	0.015
NCRMS	OR51B4	0.899	0.015
NCRMS	OR5P2	0.899	0.015
NCRMS	BATF2	0.899	0.015
NCRMS	OR2AT4	0.899	0.015
NCRMS	MMP7	0.899	0.015
NCRMS	OR8B12	0.899	0.015
NCRMS	C12orf59	0.899	0.015
NCRMS	C12orf54	0.899	0.015
NCRMS	OR2AP1	0.899	0.015
NCRMS	SLC15A5	0.899	0.015
NCRMS	KCNC2	0.899	0.015
NCRMS	IL17D	0.899	0.015
NCRMS	MYO16	0.899	0.015
NCRMS	OR4N5	0.899	0.015
NCRMS	ACOT1	0.899	0.015
NCRMS	TGM1	0.899	0.015
NCRMS	FSCB	0.899	0.015
NCRMS	ADAM6	0.899	0.015
NCRMS	PSMD7	0.899	0.015
NCRMS	CTRB1	0.899	0.015
NCRMS	PLA2G10	0.899	0.015
NCRMS	OR1D4	0.899	0.015
NCRMS	LOC284033	0.899	0.015
NCRMS	EFCAB5	0.899	0.015
NCRMS	OR4D1	0.899	0.015
NCRMS	EFCAB3	0.899	0.015
NCRMS	SCARNA16	0.899	0.015
NCRMS	STAC2	0.899	0.015
NCRMS	KRT26	0.899	0.015
NCRMS	KRT12	0.899	0.015
NCRMS	KRT19	0.899	0.015
NCRMS	RPL7P48	0.899	0.015
NCRMS	STRA13	0.899	0.015
NCRMS	ST8SIA3	0.899	0.015
NCRMS	NOL4	0.899	0.015
NCRMS	FBXO15	0.899	0.015
NCRMS	ZNF69	0.899	0.015
NCRMS	LGALS14	0.899	0.015
NCRMS	ZNF737	0.899	0.015
NCRMS	KLK4	0.899	0.015
NCRMS	LOC554201	0.899	0.015
NCRMS	LOC339809	0.899	0.015
NCRMS	CAB39	0.899	0.015
NCRMS	LRRTM4	0.899	0.015
NCRMS	DIRC1	0.899	0.015
NCRMS	BOLL	0.899	0.015
NCRMS	C2orf83	0.899	0.015
NCRMS	ATP5E	0.899	0.015
NCRMS	POTED	0.899	0.015
NCRMS	KRTAP19-1	0.899	0.015
NCRMS	KRTAP19-2	0.899	0.015
NCRMS	C21orf84	0.899	0.015
NCRMS	LOC284900	0.899	0.015
NCRMS	LIF	0.899	0.015
NCRMS	MGC15705	0.899	0.015
NCRMS	GRM7	0.899	0.015
NCRMS	OR5AC2	0.899	0.015
NCRMS	IL12A	0.899	0.015
NCRMS	CCDC39	0.899	0.015
NCRMS	FGF12	0.899	0.015
NCRMS	CHRNA9	0.899	0.015
NCRMS	UGT2B10	0.899	0.015
NCRMS	IL8	0.899	0.015
NCRMS	LRAT	0.899	0.015
NCRMS	FAM184B	0.899	0.015
NCRMS	GABRA2	0.899	0.015
NCRMS	TMPRSS11D	0.899	0.015
NCRMS	TACR3	0.899	0.015
NCRMS	NDUFC1	0.899	0.015
NCRMS	GLRA3	0.899	0.015
NCRMS	MGC45800	0.899	0.015
NCRMS	NBPF22P	0.899	0.015
NCRMS	GABRG2	0.899	0.015
NCRMS	ANKRD31	0.899	0.015
NCRMS	DNAH8	0.899	0.015
NCRMS	TTK	0.899	0.015
NCRMS	ELOVL4	0.899	0.015
NCRMS	TAAR3	0.899	0.015
NCRMS	TAAR1	0.899	0.015
NCRMS	TAGAP	0.899	0.015
NCRMS	UNC93B1	0.899	0.015
NCRMS	SOSTDC1	0.899	0.015
NCRMS	ESRP1	0.899	0.015
NCRMS	OR7E125P	0.899	0.015
NCRMS	DEFB130	0.899	0.015
NCRMS	DOK2	0.899	0.015
NCRMS	GPR20	0.899	0.015
NCRMS	SLC28A3	0.899	0.015
NCRMS	RPS2P35	0.899	0.015
NCRMS	OR13C3	0.899	0.015
NCRMS	OR1N1	0.899	0.015
NCRMS	FAM163B	0.899	0.015
NCRMS	VIPR2	0.899	0.015
NCRMS	VCX3B	0.899	0.015
NCRMS	S100G	0.899	0.015
NCRMS	CCNB3	0.899	0.015
NCRMS	FRMPD3	0.899	0.015
NCRMS	TEX11	0.899	0.015
NCRMS	CXorf50B	0.899	0.015
NCRMS	USP26	0.899	0.015
NCRMS	CT45A6	0.899	0.015
NCRMS	GABRA3	0.899	0.015
NCRMS	OR14J1	0.899	0.015
NCRMS	OR2J3	0.899	0.015
NCRMS	DPCR1	0.899	0.015
Y5	DNAH14	0.899	0.015
Y5	CUTC	0.899	0.015
Y5	EPSTI1	0.899	0.015
Y5	NMRAL1	0.899	0.015
Y5	APOL2	0.899	0.015
Y5	NKIRAS1	0.899	0.015
Y5	NAPRT1	0.899	0.015
Y5	AK3	0.899	0.015
Y5	LOC401622	0.899	0.015
ANRIL	LXN	0.898	0
H19	SEMA6B	0.898	0
SOX2OT	OXCT2	0.898	0
NCRMS	PLCH2	0.897	0.015
NCRMS	C10orf4	0.897	0.015
NCRMS	MUC15	0.897	0.015
NCRMS	CCDC73	0.897	0.015
NCRMS	IFNG	0.897	0.015
NCRMS	FAM123A	0.897	0.015
NCRMS	EML5	0.897	0.015
NCRMS	KRTAP4-12	0.897	0.015
NCRMS	KRTAP4-11	0.897	0.015
NCRMS	ICOS	0.897	0.015
NCRMS	SIM2	0.897	0.015
NCRMS	MSX1	0.897	0.015
NCRMS	C7orf66	0.897	0.015
NCRMS	TEX15	0.897	0.015
NCRMS	SRY	0.897	0.015
RMRP	BARD1	0.896	0
H19	ESM1	0.895	0
7SK	KIF6	0.892	0
ANRIL	EPHB1	0.891	0
H19	HIST1H1B	0.89	0
SOX2OT	C11orf72	0.89	0
LOC285194	PADI6	0.889	0
HOTAIR	SNORA5C	0.887	0
BC200	CA6	0.886	0.033
BC200	PRAMEF17	0.886	0.033
BC200	BRDT	0.886	0.033
BC200	KMO	0.886	0.033
BC200	OR2AJ1	0.886	0.033
BC200	OR2L5	0.886	0.033
BC200	NPPA	0.886	0.033
BC200	HYI	0.886	0.033
BC200	FMO5	0.886	0.033
BC200	ILF2	0.886	0.033
BC200	TNFSF4	0.886	0.033
BC200	F13B	0.886	0.033
BC200	PM20D1	0.886	0.033
BC200	OR2T10	0.886	0.033
BC200	PTEN	0.886	0.033
BC200	GSTO1	0.886	0.033
BC200	tAKR	0.886	0.033
BC200	AKR1C2	0.886	0.033
BC200	CLRN3	0.886	0.033
BC200	OR52K1	0.886	0.033
BC200	AMPD3	0.886	0.033
BC200	OR8H3	0.886	0.033
BC200	SLC22A18AS	0.886	0.033
BC200	OR52A5	0.886	0.033
BC200	OR52N5	0.886	0.033
BC200	OR52N1	0.886	0.033
BC200	GNG10	0.886	0.033
BC200	E2F8	0.886	0.033
BC200	DCDC5	0.886	0.033
BC200	OR4C13	0.886	0.033
BC200	OR5M10	0.886	0.033
BC200	OR1S2	0.886	0.033
BC200	OR10G6	0.886	0.033
BC200	GPRC5A	0.886	0.033
BC200	SLCO1B1	0.886	0.033
BC200	KRT18	0.886	0.033
BC200	ALX1	0.886	0.033
BC200	EFCAB4B	0.886	0.033
BC200	TAS2R9	0.886	0.033
BC200	GUCY2C	0.886	0.033
BC200	LALBA	0.886	0.033
BC200	FAM186A	0.886	0.033
BC200	GPR84	0.886	0.033
BC200	PPFIA2	0.886	0.033
BC200	PMCH	0.886	0.033
BC200	ARL11	0.886	0.033
BC200	BDKRB1	0.886	0.033
BC200	LOC196913	0.886	0.033
BC200	C14orf38	0.886	0.033
BC200	SNRPN	0.886	0.033
BC200	TMCO5A	0.886	0.033
BC200	OR4F15	0.886	0.033
BC200	GABRB3	0.886	0.033
BC200	CAPNS2	0.886	0.033
BC200	RPL3L	0.886	0.033
BC200	CCL8	0.886	0.033
BC200	FLJ35848	0.886	0.033
BC200	RPL38	0.886	0.033
BC200	TBC1D3C	0.886	0.033
BC200	HNF1B	0.886	0.033
BC200	SOST	0.886	0.033
BC200	HOXB4	0.886	0.033
BC200	GH1	0.886	0.033
BC200	C17orf90	0.886	0.033
BC200	SERPINB13	0.886	0.033
BC200	HAMP	0.886	0.033
BC200	RFPL4A	0.886	0.033
BC200	C19orf56	0.886	0.033
BC200	OR7A5	0.886	0.033
BC200	RPS4P21	0.886	0.033
BC200	ZNF599	0.886	0.033
BC200	GRIK5	0.886	0.033
BC200	PSG2	0.886	0.033
BC200	ZNF296	0.886	0.033
BC200	AP2S1	0.886	0.033
BC200	SPDYA	0.886	0.033
BC200	KYNU	0.886	0.033
BC200	DHRS9	0.886	0.033
BC200	H3F3A	0.886	0.033
BC200	KIAA1486	0.886	0.033
BC200	SP140	0.886	0.033
BC200	CGREF1	0.886	0.033
BC200	ATP6V1E2	0.886	0.033
BC200	CAPG	0.886	0.033
BC200	SCN1A	0.886	0.033
BC200	C2orf77	0.886	0.033
BC200	CERKL	0.886	0.033
BC200	TM4SF20	0.886	0.033
BC200	SEMG2	0.886	0.033
BC200	DEFB128	0.886	0.033
BC200	SLC13A3	0.886	0.033
BC200	C21orf99	0.886	0.033
BC200	KRTAP20-1	0.886	0.033
BC200	C21orf82	0.886	0.033
BC200	C21orf81	0.886	0.033
BC200	C21orf87	0.886	0.033
BC200	SMC1B	0.886	0.033
BC200	CCR9	0.886	0.033
BC200	IL5RA	0.886	0.033
BC200	DAZL	0.886	0.033
BC200	TRAIP	0.886	0.033
BC200	DNAH12	0.886	0.033
BC200	LOC401070	0.886	0.033
BC200	P2RY12	0.886	0.033
BC200	ZBBX	0.886	0.033
BC200	LRRC31	0.886	0.033
BC200	RPL39L	0.886	0.033
BC200	CLRN2	0.886	0.033
BC200	LOC389203	0.886	0.033
BC200	LOC401127	0.886	0.033
BC200	UGT2B7	0.886	0.033
BC200	UGT2A3	0.886	0.033
BC200	FLJ20184	0.886	0.033
BC200	ADAD1	0.886	0.033
BC200	ADAM29	0.886	0.033
BC200	SPINK2	0.886	0.033
BC200	SULT1E1	0.886	0.033
BC200	UCP1	0.886	0.033
BC200	PDGFC	0.886	0.033
BC200	RPL7	0.886	0.033
BC200	GDF9	0.886	0.033
BC200	LOC644714	0.886	0.033
BC200	BTN2A2	0.886	0.033
BC200	HLA-DQA2	0.886	0.033
BC200	MEP1A	0.886	0.033
BC200	SPACA1	0.886	0.033
BC200	ESR1	0.886	0.033
BC200	C6orf105	0.886	0.033
BC200	SLC17A3	0.886	0.033
BC200	GSTA3	0.886	0.033
BC200	LOC442249	0.886	0.033
BC200	TSEPA	0.886	0.033
BC200	FAM54A	0.886	0.033
BC200	ABCB5	0.886	0.033
BC200	TXNDC3	0.886	0.033
BC200	POP7	0.886	0.033
BC200	CFTR	0.886	0.033
BC200	CTAGE4	0.886	0.033
BC200	RNF32	0.886	0.033
BC200	C7orf62	0.886	0.033
BC200	RABL5	0.886	0.033
BC200	PI15	0.886	0.033
BC200	ZNF572	0.886	0.033
BC200	OR4F21	0.886	0.033
BC200	LOC442381	0.886	0.033
BC200	SLC18A1	0.886	0.033
BC200	ADRB3	0.886	0.033
BC200	RPL7	0.886	0.033
BC200	OR13D1	0.886	0.033
BC200	OR1J4	0.886	0.033
BC200	OR1Q1	0.886	0.033
BC200	ZBTB34	0.886	0.033
BC200	CD72	0.886	0.033
BC200	OR13C4	0.886	0.033
BC200	ND6	0.886	0.033
BC200	EGFL6	0.886	0.033
BC200	MAGEH1	0.886	0.033
BC200	H3F3A	0.886	0.033
BC200	RP6-213H19.1	0.886	0.033
BC200	FAM104B	0.886	0.033
BC200	NHEDC1	0.886	0.033
BC200	HSFY2	0.886	0.033
BC200	PMCHL2	0.886	0.033
BC200	OR2B3	0.886	0.033
BC200	OR11A1	0.886	0.033
LOC285194	GRIN2A	0.886	0
SOX2OT	UNQ6167	0.886	0
SOX2OT	YSK4	0.886	0
SOX2OT	CDC14C	0.886	0
Y5	IFI44L	0.886	0.033
Y5	HFE2	0.886	0.033
Y5	APOA1BP	0.886	0.033
Y5	C1orf97	0.886	0.033
Y5	PPP2R5A	0.886	0.033
Y5	MIR34A	0.886	0.033
Y5	EIF1AX	0.886	0.033
Y5	RAP1GAP	0.886	0.033
Y5	FAM46B	0.886	0.033
Y5	PTP4A2	0.886	0.033
Y5	ZMYM6	0.886	0.033
Y5	ATPAF1	0.886	0.033
Y5	KIFAP3	0.886	0.033
Y5	SNORD75	0.886	0.033
Y5	LMOD1	0.886	0.033
Y5	SEPHS1	0.886	0.033
Y5	KIF5B	0.886	0.033
Y5	PSAP	0.886	0.033
Y5	TLL2	0.886	0.033
Y5	NDUFB8	0.886	0.033
Y5	ACTR1A	0.886	0.033
Y5	ATE1	0.886	0.033
Y5	CD151	0.886	0.033
Y5	MS4A7	0.886	0.033
Y5	TMEM109	0.886	0.033
Y5	CD59	0.886	0.033
Y5	SLC29A2	0.886	0.033
Y5	GEFT	0.886	0.033
Y5	SCYL2	0.886	0.033
Y5	SDSL	0.886	0.033
Y5	SPRYD3	0.886	0.033
Y5	ANAPC5	0.886	0.033
Y5	NUDT15	0.886	0.033
Y5	C14orf115	0.886	0.033
Y5	DHRS1	0.886	0.033
Y5	ASB2	0.886	0.033
Y5	IFI27L2	0.886	0.033
Y5	FRMD5	0.886	0.033
Y5	ANP32A	0.886	0.033
Y5	C15orf59	0.886	0.033
Y5	CIB2	0.886	0.033
Y5	HOMER2	0.886	0.033
Y5	NUBP1	0.886	0.033
Y5	MGC23284	0.886	0.033
Y5	MYH11	0.886	0.033
Y5	NOMO3	0.886	0.033
Y5	ITFG1	0.886	0.033
Y5	MRPL45	0.886	0.033
Y5	GDPD1	0.886	0.033
Y5	SDHC	0.886	0.033
Y5	PIGS	0.886	0.033
Y5	CDH20	0.886	0.033
Y5	AQP4	0.886	0.033
Y5	GPR32	0.886	0.033
Y5	KIAA1881	0.886	0.033
Y5	ZNF563	0.886	0.033
Y5	ERCC1	0.886	0.033
Y5	TPO	0.886	0.033
Y5	HPCAL1	0.886	0.033
Y5	SPR	0.886	0.033
Y5	NPAS2	0.886	0.033
Y5	TMEM182	0.886	0.033
Y5	EFHD1	0.886	0.033
Y5	FAM98A	0.886	0.033
Y5	REEP1	0.886	0.033
Y5	CHRNA1	0.886	0.033
Y5	C2orf52	0.886	0.033
Y5	MYLK2	0.886	0.033
Y5	ATP5J	0.886	0.033
Y5	CCT8	0.886	0.033
Y5	TCP10L	0.886	0.033
Y5	LIF	0.886	0.033
Y5	C3orf1	0.886	0.033
Y5	MRPS22	0.886	0.033
Y5	TIMP4	0.886	0.033
Y5	HIGD1A	0.886	0.033
Y5	HYAL1	0.886	0.033
Y5	ITIH4	0.886	0.033
Y5	SORCS2	0.886	0.033
Y5	LAP3	0.886	0.033
Y5	UCHL1	0.886	0.033
Y5	ARSJ	0.886	0.033
Y5	SDCCAG10	0.886	0.033
Y5	AGGF1	0.886	0.033
Y5	SGCD	0.886	0.033
Y5	EMB	0.886	0.033
Y5	NKAPL	0.886	0.033
Y5	NRN1	0.886	0.033
Y5	ZFP57	0.886	0.033
Y5	C6orf125	0.886	0.033
Y5	CCND3	0.886	0.033
Y5	DEFB113	0.886	0.033
Y5	KLHL31	0.886	0.033
Y5	ME1	0.886	0.033
Y5	TMEM106B	0.886	0.033
Y5	STEAP2	0.886	0.033
Y5	ASB4	0.886	0.033
Y5	ARMC10	0.886	0.033
Y5	C7orf53	0.886	0.033
Y5	ABP1	0.886	0.033
Y5	GGCT	0.886	0.033
Y5	LSM5	0.886	0.033
Y5	BCL7B	0.886	0.033
Y5	PDAP1	0.886	0.033
Y5	GATA4	0.886	0.033
Y5	RDH10	0.886	0.033
Y5	LRRCC1	0.886	0.033
Y5	NDUFB9	0.886	0.033
Y5	FRMPD1	0.886	0.033
Y5	STX17	0.886	0.033
Y5	C9orf46	0.886	0.033
Y5	PLAA	0.886	0.033
Y5	C9orf80	0.886	0.033
Y5	TRUB2	0.886	0.033
Y5	C9orf37	0.886	0.033
Y5	XG	0.886	0.033
Y5	RGN	0.886	0.033
Y5	ARMCX1	0.886	0.033
Y5	BCAP31	0.886	0.033
Y5	MPP1	0.886	0.033
Y5	CCHCR1	0.886	0.033
SOX2OT	ARHGEF16	0.885	0
SOX2OT	LIX1	0.884	0
SOX2OT	ARHGDIG	0.883	0
Y5	ZNF18	0.883	0.02
Y5	CCDC56	0.883	0.02
ANRIL	HIST2H2AB	0.882	0
NCRMS	MSTP9	0.882	0.02
NCRMS	CD164L2	0.882	0.02
NCRMS	OR6K2	0.882	0.02
NCRMS	MYO3A	0.882	0.02
NCRMS	CCNYL2	0.882	0.02
NCRMS	C11orf40	0.882	0.02
NCRMS	OR8D1	0.882	0.02
NCRMS	RPL41	0.882	0.02
NCRMS	IL23A	0.882	0.02
NCRMS	SIRT4	0.882	0.02
NCRMS	IQCD	0.882	0.02
NCRMS	SERP2	0.882	0.02
NCRMS	C15orf21	0.882	0.02
NCRMS	FOXF1	0.882	0.02
NCRMS	TUBB3	0.882	0.02
NCRMS	LOC100130794	0.882	0.02
NCRMS	FLJ45079	0.882	0.02
NCRMS	B3GNTL1	0.882	0.02
NCRMS	KRTAP1-5	0.882	0.02
NCRMS	MEIS3	0.882	0.02
NCRMS	EPCAM	0.882	0.02
NCRMS	SULT1C3	0.882	0.02
NCRMS	BMP10	0.882	0.02
NCRMS	KCNJ13	0.882	0.02
NCRMS	ANKRD62	0.882	0.02
NCRMS	CD200R1	0.882	0.02
NCRMS	TMPRSS11E	0.882	0.02
NCRMS	ANXA10	0.882	0.02
NCRMS	HCRTR2	0.882	0.02
NCRMS	PKIB	0.882	0.02
NCRMS	GPRC6A	0.882	0.02
NCRMS	TAAR2	0.882	0.02
NCRMS	IL22RA2	0.882	0.02
NCRMS	CYP3A4	0.882	0.02
NCRMS	NACAP1	0.882	0.02
NCRMS	GSDMD	0.882	0.02
NCRMS	IFNA14	0.882	0.02
NCRMS	PAGE2B	0.882	0.02
NCRMS	HMGB3	0.882	0.02
NCRMS	XKRX	0.882	0.02
NCRMS	OR2J2	0.882	0.02
ANRIL	C6orf123	0.881	0
SOX2OT	AMDHD1	0.881	0
SOX2OT	CXorf25	0.881	0
HOXA11AS	DEFB133	0.88	0
Y5	SAA1	0.88	0.021
H19	H19	0.879	0
HOXA11AS	CCL18	0.879	0
SOX2OT	DNAH14	0.879	0
SOX2OT	TM6SF2	0.879	0
ANRIL	HIST1H3B	0.877	0
ANRIL	HIST1H3I	0.877	0
HOTAIR	NCRNA00152	0.877	0
HOXA11AS	RESP18	0.877	0
HOXA11AS	RAB3C	0.877	0
LOC285194	OR7A10	0.877	0
ANRIL	HIST1H1A	0.875	0
RMRP	CKMT1A	0.874	0
SOX2OT	CA12	0.874	0
SOX2OT	LINGO1	0.874	0
SOX2OT	SPACA5	0.874	0
SOX2OT	P2RY4	0.874	0
ANRIL	SLC25A43	0.872	0
SOX2OT	ZNF385C	0.872	0
SOX2OT	AFF2	0.872	0
HOTAIR	MAGT1	0.871	0
LOC285194	NIACR1	0.871	0
7SK	OLIG3	0.87	0
BC200	APITD1	0.87	0.024
BC200	LIPC	0.87	0.024
BC200	NRG4	0.87	0.024
BC200	ZNF750	0.87	0.024
BC200	SLC12A5	0.87	0.024
BC200	CNTN4	0.87	0.024
BC200	TMEM42	0.87	0.024
BC200	C4orf16	0.87	0.024
NCRMS	C1orf187	0.87	0.024
NCRMS	SPRR1A	0.87	0.024
NCRMS	CR1	0.87	0.024
NCRMS	LOC148696	0.87	0.024
NCRMS	OR2T8	0.87	0.024
NCRMS	hCG_1647286	0.87	0.024
NCRMS	C1orf216	0.87	0.024
NCRMS	CYP4A11	0.87	0.024
NCRMS	PTGER3	0.87	0.024
NCRMS	OR10J5	0.87	0.024
NCRMS	C1orf14	0.87	0.024
NCRMS	GOLT1A	0.87	0.024
NCRMS	PIGR	0.87	0.024
NCRMS	OR2T34	0.87	0.024
NCRMS	SH3BP5L	0.87	0.024
NCRMS	SPAG6	0.87	0.024
NCRMS	LOC440888	0.87	0.024
NCRMS	KCNK18	0.87	0.024
NCRMS	CYP17A1	0.87	0.024
NCRMS	TSSC4	0.87	0.024
NCRMS	MS4A3	0.87	0.024
NCRMS	GNG3	0.87	0.024
NCRMS	TYR	0.87	0.024
NCRMS	OR8D4	0.87	0.024
NCRMS	OR51G2	0.87	0.024
NCRMS	OR52L2P	0.87	0.024
NCRMS	CCDC153	0.87	0.024
NCRMS	GSG1	0.87	0.024
NCRMS	DCD	0.87	0.024
NCRMS	MYO1A	0.87	0.024
NCRMS	TRIAP1	0.87	0.024
NCRMS	DAOA	0.87	0.024
NCRMS	C14orf100	0.87	0.024
NCRMS	PPIL5	0.87	0.024
NCRMS	SIX4	0.87	0.024
NCRMS	DYNLRB2	0.87	0.024
NCRMS	C16orf81	0.87	0.024
NCRMS	TBX6	0.87	0.024
NCRMS	TP53TG3	0.87	0.024
NCRMS	C16orf48	0.87	0.024
NCRMS	SLC13A2	0.87	0.024
NCRMS	C17orf53	0.87	0.024
NCRMS	SYNGR2	0.87	0.024
NCRMS	KRT24	0.87	0.024
NCRMS	KRT38	0.87	0.024
NCRMS	C17orf55	0.87	0.024
NCRMS	KRTAP1-1	0.87	0.024
NCRMS	FLJ45743	0.87	0.024
NCRMS	ICAM4	0.87	0.024
NCRMS	FXYD7	0.87	0.024
NCRMS	ZBTB32	0.87	0.024
NCRMS	FLJ40235	0.87	0.024
NCRMS	IL28B	0.87	0.024
NCRMS	CEACAM7	0.87	0.024
NCRMS	CDC42EP5	0.87	0.024
NCRMS	NLRP11	0.87	0.024
NCRMS	FAM128B	0.87	0.024
NCRMS	SPP2	0.87	0.024
NCRMS	FAM132B	0.87	0.024
NCRMS	FSHR	0.87	0.024
NCRMS	SEPT10	0.87	0.024
NCRMS	PDE11A	0.87	0.024
NCRMS	TMEFF2	0.87	0.024
NCRMS	CCDC108	0.87	0.024
NCRMS	PDYN	0.87	0.024
NCRMS	HMGB3L1	0.87	0.024
NCRMS	TP53TG5	0.87	0.024
NCRMS	NEFH	0.87	0.024
NCRMS	UPK3A	0.87	0.024
NCRMS	PLA2G3	0.87	0.024
NCRMS	VILL	0.87	0.024
NCRMS	ZDHHC23	0.87	0.024
NCRMS	TRIM42	0.87	0.024
NCRMS	VN2R1P	0.87	0.024
NCRMS	CD80	0.87	0.024
NCRMS	SLC12A8	0.87	0.024
NCRMS	SLC2A2	0.87	0.024
NCRMS	NAT8L	0.87	0.024
NCRMS	LOC728220	0.87	0.024
NCRMS	DNAH5	0.87	0.024
NCRMS	KCNK16	0.87	0.024
NCRMS	DEFB110	0.87	0.024
NCRMS	IL17F	0.87	0.024
NCRMS	RAET1L	0.87	0.024
NCRMS	LPA	0.87	0.024
NCRMS	LOC100130988	0.87	0.024
NCRMS	WNT16	0.87	0.024
NCRMS	CLCN1	0.87	0.024
NCRMS	ARHGEF5	0.87	0.024
NCRMS	TDH	0.87	0.024
NCRMS	GINS4	0.87	0.024
NCRMS	RNU105C	0.87	0.024
NCRMS	DNAJC5B	0.87	0.024
NCRMS	GOT1L1	0.87	0.024
NCRMS	KCNV2	0.87	0.024
NCRMS	XAGE5	0.87	0.024
NCRMS	MORC4	0.87	0.024
NCRMS	MAGEA2	0.87	0.024
NCRMS	TTTY13	0.87	0.024
NCRMS	LY6G5C	0.87	0.024
SOX2OT	UBASH3B	0.87	0
Y5	RNF11	0.87	0.024
Y5	DAP3	0.87	0.024
Y5	CC2D1B	0.87	0.024
Y5	OR1S1	0.87	0.024
Y5	LOC253724	0.87	0.024
Y5	CSPG4	0.87	0.024
Y5	SPAG7	0.87	0.024
Y5	C3orf32	0.87	0.024
Y5	PDCL2	0.87	0.024
Y5	IL21	0.87	0.024
NCRMS	CD52	0.868	0.025
NCRMS	YOD1	0.868	0.025
NCRMS	DRGX	0.868	0.025
NCRMS	OR7E87P	0.868	0.025
NCRMS	CNTN5	0.868	0.025
NCRMS	LOC100129884	0.868	0.025
NCRMS	ARMC5	0.868	0.025
NCRMS	CCDC135	0.868	0.025
NCRMS	KRTAP9-2	0.868	0.025
NCRMS	ASNA1	0.868	0.025
NCRMS	ARPP-21	0.868	0.025
NCRMS	RAB41	0.868	0.025
ANRIL	FKBP1A	0.867	0
H19	C5orf13	0.867	0
SOX2OT	WBP2NL	0.867	0
HOTAIR	NLGN4Y	0.865	0
SOX2OT	FKBP1B	0.865	0
SOX2OT	TPD52L3	0.865	0
SOX2OT	LCN10	0.865	0
HOTAIR	EGLN3	0.864	0
LOC285194	LOC388915	0.864	0
ANRIL	MKI67	0.863	0
RMRP	DIRAS3	0.863	0
SOX2OT	SLC35F4	0.862	0
ANRIL	C5orf13	0.861	0
EGO	KIF21B	0.861	0
H19	SCARB1	0.86	0
HOTAIR	POTEF	0.86	0
SOX2OT	GCNT3	0.86	0.001
SOX2OT	PCDHB1	0.86	0.001
SOX2OT	LOC643763	0.86	0.001
HOXA11AS	SPINT2	0.859	0
RMRP	PPCS	0.859	0
SOX2OT	RBPJL	0.859	0
ANRIL	PTMA	0.858	0
H19	DTL	0.858	0
SOX2OT	ZP1	0.858	0
SOX2OT	UTS2R	0.858	0
SOX2OT	KCNK15	0.858	0
7SK	MGC16703	0.857	0
LOC285194	DKFZP547L112	0.857	0
SOX2OT	RP13-388O5.1	0.857	0
ANRIL	DTL	0.856	0
H19	APOE	0.856	0
H19	CCNJ	0.855	0
H19	LIG1	0.855	0
HOTAIR	NR1D1	0.855	0
SOX2OT	FAM57B	0.855	0
SOX2OT	PTK6	0.855	0
ANRIL	DOCK8	0.854	0
RMRP	RAN	0.854	0
SOX2OT	RXFP2	0.853	0.001
ANRIL	AOAH	0.851	0
H19	FAM70B	0.851	0
H19	CASC5	0.851	0
H19	MLC1	0.851	0
HOXA11AS	UCHL1	0.851	0
NCRMS	HKDC1	0.851	0.032
NCRMS	FEZF2	0.851	0.032
SOX2OT	EPHB2	0.851	0
SRA	GPR18	0.851	0
SRA	P2RX6	0.851	0
7SK	IFNA16	0.85	0
HOXA11AS	FHDC1	0.85	0
LOC285194	FLJ44838	0.85	0
ANRIL	CENPK	0.849	0
7SK	CLRN2	0.848	0
H19	GABRQ	0.848	0
HOXA11AS	RTN2	0.848	0
SOX2OT	CRHR2	0.848	0
SOX2OT	KIF27	0.848	0
SOX2OT	C6orf132	0.847	0.001
SOX2OT	ZC3H12A	0.846	0.001
SOX2OT	NPHS2	0.846	0.001
SOX2OT	CD3G	0.846	0.001
SOX2OT	ANKRD24	0.846	0.001
SOX2OT	RHBDD3	0.846	0.001
HOXA11AS	NRL	0.844	0.001
SOX2OT	SKCG-1	0.844	0.001
SOX2OT	IL31	0.844	0.001
SOX2OT	G6PC2	0.844	0.001
SOX2OT	ANKRD30B	0.844	0.001
SOX2OT	TCEAL5	0.844	0.001
ANRIL	ANXA2P2	0.842	0.001
EGO	FKBP6	0.842	0.001
H19	C14orf143	0.842	0.001
HOTAIR	C17orf47	0.842	0.001
BC200	PCP4L1	0.841	0.036
BC200	S100A4	0.841	0.036
BC200	TOR1AIP1	0.841	0.036
BC200	RGS7	0.841	0.036
BC200	TRIM64	0.841	0.036
BC200	C11orf34	0.841	0.036
BC200	ZCRB1	0.841	0.036
BC200	GSG2	0.841	0.036
BC200	OR1D5	0.841	0.036
BC200	MYH1	0.841	0.036
BC200	CABYR	0.841	0.036
BC200	DPP10	0.841	0.036
BC200	YWHAE	0.841	0.036
BC200	CHCHD6	0.841	0.036
BC200	UGT8	0.841	0.036
BC200	EPHA5	0.841	0.036
BC200	CCDC158	0.841	0.036
BC200	GABRA6	0.841	0.036
BC200	OR9A4	0.841	0.036
BC200	ADAMDEC1	0.841	0.036
BC200	SHARPIN	0.841	0.036
BC200	OR12D3	0.841	0.036
EGO	KRTAP1-1	0.841	0.001
NCRMS	C1orf211	0.841	0.036
NCRMS	PARK7	0.841	0.036
NCRMS	TMEM82	0.841	0.036
NCRMS	CDKN2C	0.841	0.036
NCRMS	TYW3	0.841	0.036
NCRMS	HAO2	0.841	0.036
NCRMS	PDE4DIP	0.841	0.036
NCRMS	S100A1	0.841	0.036
NCRMS	HAPLN2	0.841	0.036
NCRMS	NOS1AP	0.841	0.036
NCRMS	TBX19	0.841	0.036
NCRMS	DNM3	0.841	0.036
NCRMS	KCNK2	0.841	0.036
NCRMS	VN1R5	0.841	0.036
NCRMS	OR2G6	0.841	0.036
NCRMS	PRAMEF5	0.841	0.036
NCRMS	EPHA10	0.841	0.036
NCRMS	INSL5	0.841	0.036
NCRMS	NUP210L	0.841	0.036
NCRMS	OR6K3	0.841	0.036
NCRMS	TNR	0.841	0.036
NCRMS	SLC30A10	0.841	0.036
NCRMS	MRPL55	0.841	0.036
NCRMS	TRIM17	0.841	0.036
NCRMS	PGBD5	0.841	0.036
NCRMS	OR11L1	0.841	0.036
NCRMS	OR2T35	0.841	0.036
NCRMS	ANKRD30A	0.841	0.036
NCRMS	STAMBPL1	0.841	0.036
NCRMS	TECTB	0.841	0.036
NCRMS	C10orf81	0.841	0.036
NCRMS	BTBD16	0.841	0.036
NCRMS	ACBD7	0.841	0.036
NCRMS	TRIM22	0.841	0.036
NCRMS	LOC100129827	0.841	0.036
NCRMS	SLC17A6	0.841	0.036
NCRMS	ANO3	0.841	0.036
NCRMS	OR5D3P	0.841	0.036
NCRMS	OR5J2	0.841	0.036
NCRMS	P2RY6	0.841	0.036
NCRMS	OR4D5	0.841	0.036
NCRMS	CALCA	0.841	0.036
NCRMS	OR4C45	0.841	0.036
NCRMS	OR5I1	0.841	0.036
NCRMS	OR5F1	0.841	0.036
NCRMS	OR8H1	0.841	0.036
NCRMS	OR5M8	0.841	0.036
NCRMS	PPP1CA	0.841	0.036
NCRMS	MRGPRD	0.841	0.036
NCRMS	TRIM49	0.841	0.036
NCRMS	KIRREL3	0.841	0.036
NCRMS	CLEC6A	0.841	0.036
NCRMS	HSD17B6	0.841	0.036
NCRMS	C12orf64	0.841	0.036
NCRMS	LRRIQ1	0.841	0.036
NCRMS	CUX2	0.841	0.036
NCRMS	GLT1D1	0.841	0.036
NCRMS	LOC338797	0.841	0.036
NCRMS	CDCA3	0.841	0.036
NCRMS	PRB4	0.841	0.036
NCRMS	RERGL	0.841	0.036
NCRMS	OVCH1	0.841	0.036
NCRMS	SMAGP	0.841	0.036
NCRMS	AVIL	0.841	0.036
NCRMS	KERA	0.841	0.036
NCRMS	SLC25A15	0.841	0.036
NCRMS	TDRD3	0.841	0.036
NCRMS	LECT1	0.841	0.036
NCRMS	OR4M1	0.841	0.036
NCRMS	LRRC16B	0.841	0.036
NCRMS	TTC6	0.841	0.036
NCRMS	LRFN5	0.841	0.036
NCRMS	POTEG	0.841	0.036
NCRMS	MDGA2	0.841	0.036
NCRMS	RTN1	0.841	0.036
NCRMS	SERPINA6	0.841	0.036
NCRMS	LBXCOR1	0.841	0.036
NCRMS	BRUNOL6	0.841	0.036
NCRMS	SBK1	0.841	0.036
NCRMS	MT1H	0.841	0.036
NCRMS	FLJ46121	0.841	0.036
NCRMS	OR1A2	0.841	0.036
NCRMS	OR3A4	0.841	0.036
NCRMS	KCNJ12	0.841	0.036
NCRMS	GSDMA	0.841	0.036
NCRMS	CACNA1G	0.841	0.036
NCRMS	SLC43A2	0.841	0.036
NCRMS	KRT20	0.841	0.036
NCRMS	KRTAP4-4	0.841	0.036
NCRMS	KRTAP4-2	0.841	0.036
NCRMS	KRTAP4-1	0.841	0.036
NCRMS	HOXB1	0.841	0.036
NCRMS	TTLL6	0.841	0.036
NCRMS	TAC4	0.841	0.036
NCRMS	HSF5	0.841	0.036
NCRMS	RPL36AP46	0.841	0.036
NCRMS	MIF4GD	0.841	0.036
NCRMS	DNAH17	0.841	0.036
NCRMS	OR4K15	0.841	0.036
NCRMS	C18orf2	0.841	0.036
NCRMS	DLGAP1	0.841	0.036
NCRMS	RIT2	0.841	0.036
NCRMS	OR4F17	0.841	0.036
NCRMS	OR10H3	0.841	0.036
NCRMS	ZNF444	0.841	0.036
NCRMS	MBD3L2	0.841	0.036
NCRMS	OR7C1	0.841	0.036
NCRMS	NFKBID	0.841	0.036
NCRMS	CLDND2	0.841	0.036
NCRMS	KCNK3	0.841	0.036
NCRMS	ANKRD53	0.841	0.036
NCRMS	IGKC	0.841	0.036
NCRMS	GPR17	0.841	0.036
NCRMS	ARHGEF4	0.841	0.036
NCRMS	C2orf21	0.841	0.036
NCRMS	C2orf7	0.841	0.036
NCRMS	TEKT4	0.841	0.036
NCRMS	NGEF	0.841	0.036
NCRMS	OTOR	0.841	0.036
NCRMS	SPINT4	0.841	0.036
NCRMS	C20orf43	0.841	0.036
NCRMS	SRXN1	0.841	0.036
NCRMS	SOD1	0.841	0.036
NCRMS	KRTAP26-1	0.841	0.036
NCRMS	KRTAP13-2	0.841	0.036
NCRMS	KRTAP19-7	0.841	0.036
NCRMS	OR11H1	0.841	0.036
NCRMS	XKR3	0.841	0.036
NCRMS	PVALB	0.841	0.036
NCRMS	TNFRSF13C	0.841	0.036
NCRMS	APOA1	0.841	0.036
NCRMS	THAP4	0.841	0.036
NCRMS	STXBP5L	0.841	0.036
NCRMS	ADIPOQ	0.841	0.036
NCRMS	OXTR	0.841	0.036
NCRMS	CYP8B1	0.841	0.036
NCRMS	DNAH12	0.841	0.036
NCRMS	KIAA1524	0.841	0.036
NCRMS	WDR49	0.841	0.036
NCRMS	HTN1	0.841	0.036
NCRMS	GRID2	0.841	0.036
NCRMS	IL15	0.841	0.036
NCRMS	HHIP	0.841	0.036
NCRMS	FGFBP1	0.841	0.036
NCRMS	GABRG1	0.841	0.036
NCRMS	TMPRSS11B	0.841	0.036
NCRMS	UGT2A1	0.841	0.036
NCRMS	TRPC3	0.841	0.036
NCRMS	RNF175	0.841	0.036
NCRMS	HPGD	0.841	0.036
NCRMS	FRG2	0.841	0.036
NCRMS	ISL1	0.841	0.036
NCRMS	DDX4	0.841	0.036
NCRMS	BHMT2	0.841	0.036
NCRMS	POLR3G	0.841	0.036
NCRMS	KIAA1024L	0.841	0.036
NCRMS	CDH10	0.841	0.036
NCRMS	C5orf36	0.841	0.036
NCRMS	JAKMIP2	0.841	0.036
NCRMS	FAT2	0.841	0.036
NCRMS	TIMD4	0.841	0.036
NCRMS	TFAP2D	0.841	0.036
NCRMS	BEND6	0.841	0.036
NCRMS	DDX43	0.841	0.036
NCRMS	RLBP1L2	0.841	0.036
NCRMS	LRP11	0.841	0.036
NCRMS	C6orf97	0.841	0.036
NCRMS	ACAT2	0.841	0.036
NCRMS	KIAA0319	0.841	0.036
NCRMS	LGSN	0.841	0.036
NCRMS	HS3ST5	0.841	0.036
NCRMS	SAMD3	0.841	0.036
NCRMS	VNN3	0.841	0.036
NCRMS	TCTE3	0.841	0.036
NCRMS	NPSR1	0.841	0.036
NCRMS	C7orf57	0.841	0.036
NCRMS	C7orf59	0.841	0.036
NCRMS	SPAM1	0.841	0.036
NCRMS	OR2A12	0.841	0.036
NCRMS	OR2A1	0.841	0.036
NCRMS	LOC100129484	0.841	0.036
NCRMS	IL6	0.841	0.036
NCRMS	CALCR	0.841	0.036
NCRMS	ATP6V0D2	0.841	0.036
NCRMS	MAL2	0.841	0.036
NCRMS	OR7E125P	0.841	0.036
NCRMS	DEFB106A	0.841	0.036
NCRMS	LOC349196	0.841	0.036
NCRMS	SGCZ	0.841	0.036
NCRMS	ADAM2	0.841	0.036
NCRMS	REXO1L1	0.841	0.036
NCRMS	GDA	0.841	0.036
NCRMS	C9orf16	0.841	0.036
NCRMS	NOXA1	0.841	0.036
NCRMS	CCL27	0.841	0.036
NCRMS	LOC100132167	0.841	0.036
NCRMS	LOC100132785	0.841	0.036
NCRMS	FAM75C1	0.841	0.036
NCRMS	OR13C5	0.841	0.036
NCRMS	AMBP	0.841	0.036
NCRMS	FLJ46836	0.841	0.036
NCRMS	UIMC1	0.841	0.036
NCRMS	SPACA5	0.841	0.036
NCRMS	PCSK1N	0.841	0.036
NCRMS	HSFX1	0.841	0.036
NCRMS	DUX4	0.841	0.036
NCRMS	TTTY9A	0.841	0.036
NCRMS	RBMY1E	0.841	0.036
NCRMS	DAZ2	0.841	0.036
SOX2OT	MYH1	0.841	0.001
SOX2OT	ANKRD20A5	0.841	0.001
Y5	TEAD1	0.841	0.036
Y5	HMBS	0.841	0.036
Y5	MNAT1	0.841	0.036
Y5	KIAA1409	0.841	0.036
Y5	ASPG	0.841	0.036
Y5	MORF4L1	0.841	0.036
Y5	C22orf39	0.841	0.036
Y5	OPA1	0.841	0.036
Y5	LPHN3	0.841	0.036
Y5	PET112L	0.841	0.036
Y5	KLHL3	0.841	0.036
Y5	HIST1H2BA	0.841	0.036
Y5	SLC22A3	0.841	0.036
Y5	GSTK1	0.841	0.036
Y5	TAS2R41	0.841	0.036
Y5	TIGD5	0.841	0.036
Y5	LYPLA1	0.841	0.036
Y5	FRMD3	0.841	0.036
ANRIL	FAM86D	0.84	0.001
ANRIL	HIST1H2BF	0.84	0.001
ANRIL	HIST1H2BM	0.84	0.001
ANRIL	HIST2H3D	0.839	0.001
H19	PRND	0.839	0.001
HOXA11AS	C11orf72	0.839	0.001
SOX2OT	AGMAT	0.839	0.001
SOX2OT	BSX	0.839	0.001
SOX2OT	NIACR2	0.839	0.001
SOX2OT	NETO1	0.839	0.001
SOX2OT	NCR1	0.839	0.001
SOX2OT	hCG_1993592	0.839	0.001
SOX2OT	DZIP1L	0.839	0.001
SOX2OT	JAKMIP2	0.839	0.001
SOX2OT	UBE2DNL	0.839	0.001
SOX2OT	ITIH5L	0.839	0.001
EGO	KIAA0125	0.838	0.001
NCRMS	REG4	0.838	0.037
NCRMS	REN	0.838	0.037
NCRMS	OR5L2	0.838	0.037
NCRMS	OVCH2	0.838	0.037
NCRMS	ZMYM2	0.838	0.037
NCRMS	C14orf23	0.838	0.037
NCRMS	CLUL1	0.838	0.037
NCRMS	LAMA1	0.838	0.037
NCRMS	C22orf37	0.838	0.037
NCRMS	FAM116A	0.838	0.037
NCRMS	FABP7	0.838	0.037
NCRMS	C7orf30	0.838	0.037
NCRMS	TTPA	0.838	0.037
H19	MKI67	0.837	0.001
HOTAIR	GPR160	0.837	0.001
SOX2OT	SIGIRR	0.837	0.001
SOX2OT	GRK1	0.837	0.001
SOX2OT	IL11	0.837	0.001
LOC285194	GYG2	0.836	0.001
NCRMS	PSPH	0.836	0.038
SOX2OT	FBXL22	0.836	0.001
7SK	HRASLS	0.835	0.001
ANRIL	FSCN1	0.835	0.001
H19	C8orf73	0.835	0.001
HOXA11AS	GRK1	0.835	0.001
RMRP	SERPINB3	0.835	0.001
SOX2OT	hCG_2009921	0.835	0.001
SRA	LAD1	0.835	0.001
LOC285194	TGM3	0.834	0.001
SOX2OT	ENPP7	0.834	0.001
SOX2OT	NPY2R	0.834	0.001
SOX2OT	NKX3-2	0.834	0.001
7SK	SLC26A7	0.833	0.001
EGO	CRLF1	0.833	0.001
EGO	TMEM217	0.833	0.001
LOC285194	FLYWCH1	0.833	0.001
LOC285194	ACER1	0.833	0.001
SOX2OT	FAM24B	0.833	0.001
SRA	OR2T33	0.833	0.001
7SK	MGC72080	0.832	0.001
ANRIL	ZNF485	0.832	0.001
H19	PPYR1	0.832	0.001
H19	PAMR1	0.832	0.001
HOXA11AS	CHPF	0.832	0.001
LOC285194	OSTbeta	0.832	0.001
LOC285194	PMFBP1	0.832	0.001
NCRMS	PGR	0.832	0.04
NCRMS	RAVER1	0.832	0.04
NCRMS	SYT5	0.832	0.04
NCRMS	CTNNAL1	0.832	0.04
NCRMS	DACH2	0.832	0.04
SOX2OT	DMRTA2	0.832	0.001
SOX2OT	PAQR6	0.832	0.001
SOX2OT	CPLX3	0.832	0.001
SOX2OT	FBXO15	0.832	0.001
SOX2OT	NKX2-4	0.832	0.001
SOX2OT	LRP5L	0.832	0.001
SOX2OT	STMN2	0.832	0.001
EGO	RP11-37E23.4	0.831	0.001
EGO	ZFP42	0.831	0.001
H19	THY1	0.83	0.001
H19	GUCY1B3	0.83	0.001
SOX2OT	CC2D1B	0.83	0.001
SOX2OT	WDR24	0.83	0.001
SOX2OT	SPATC1	0.83	0.001
7SK	RNF32	0.828	0.001
ANRIL	PCNXL2	0.828	0.001
H19	EZH2	0.828	0.001
EGO	NMB	0.827	0.001
H19	FAM35A	0.827	0.001
HOXA11AS	PRKG2	0.827	0.001
SOX2OT	MCART6	0.827	0.001
EGO	GDF6	0.826	0.001
ANRIL	DOCK10	0.825	0.001
H19	SPIN4	0.825	0.001
HOXA11AS	C2	0.825	0.001
LOC285194	PRKCG	0.825	0.001
SOX2OT	C10orf53	0.825	0.002
SOX2OT	OR4N5	0.825	0.002
SOX2OT	GAFA1	0.825	0.002
SOX2OT	FBXL16	0.825	0.002
SOX2OT	LRP3	0.825	0.001
NCRMS	PCP4L1	0.824	0.044
NCRMS	S100A4	0.824	0.044
NCRMS	TOR1AIP1	0.824	0.044
NCRMS	OR5M3	0.824	0.044
NCRMS	MYH1	0.824	0.044
NCRMS	CABYR	0.824	0.044
NCRMS	C18orf34	0.824	0.044
NCRMS	YWHAE	0.824	0.044
NCRMS	OR5K4	0.824	0.044
NCRMS	UGT8	0.824	0.044
NCRMS	SLC26A4	0.824	0.044
NCRMS	SLC26A7	0.824	0.044
NCRMS	PSCA	0.824	0.044
7SK	ANKRD62	0.823	0.001
EGO	KRT71	0.823	0.001
EGO	COX6B2	0.823	0.001
EGO	KRTAP10-7	0.823	0.001
H19	BUB1	0.823	0.001
H19	LXN	0.823	0.001
H19	MICALL2	0.823	0.001
HOTAIR	C12orf42	0.823	0.001
SOX2OT	FLJ13224	0.823	0.001
SOX2OT	PRSS27	0.823	0.001
SOX2OT	C2orf51	0.823	0.001
SOX2OT	TXNDC8	0.823	0.001
SOX2OT	COL4A6	0.823	0.001
ANRIL	TBX20	0.822	0.001
EGO	SEC14L4	0.822	0.001
ANRIL	NR5A2	0.821	0.001
H19	GALNT6	0.821	0.001
SOX2OT	GLDC	0.821	0.001
SRA	DNER	0.821	0.001
7SK	C6orf203	0.82	0.001
H19	PPM1F	0.82	0.001
HOXA11AS	ARSJ	0.82	0.001
HOXA11AS	CTAGE6	0.82	0.001
HOXA11AS	FAM27E3	0.82	0.001
RMRP	SULT1A2	0.82	0.001
SOX2OT	DKFZp779M0652	0.82	0.001
SOX2OT	FOLR1	0.82	0.001
Y5	DHX37	0.82	0.046
Y5	RBM38	0.82	0.046
ANRIL	CDC42EP1	0.819	0.001
HOTAIR	SNORA55	0.819	0.001
SRA	SNX21	0.819	0.001
H19	AGAP1	0.818	0.001
HOTAIR	C7orf11	0.818	0.001
HOXA11AS	ANKRD62	0.818	0.001
SOX2OT	SPRR4	0.818	0.002
SOX2OT	P2RY6	0.818	0.002
SOX2OT	CMTM5	0.818	0.002
SOX2OT	BATF	0.818	0.002
SOX2OT	HEATR4	0.818	0.002
SOX2OT	CNP	0.818	0.002
SOX2OT	PPY	0.818	0.002
SOX2OT	SALL3	0.818	0.002
SOX2OT	LOC641367	0.818	0.002
SOX2OT	GPR32	0.818	0.002
SOX2OT	PSG7	0.818	0.002
SOX2OT	SIX3	0.818	0.001
SOX2OT	HS1BP3	0.818	0.001
SOX2OT	KCNH7	0.818	0.002
SOX2OT	AQP12A	0.818	0.002
SOX2OT	SCAND1	0.818	0.002
SOX2OT	SEPT5	0.818	0.002
SOX2OT	CACNA1I	0.818	0.001
SOX2OT	TMEM211	0.818	0.002
H19	FJX1	0.816	0.001
H19	SH2B3	0.816	0.001
H19	APLN	0.816	0.001
HOXA11AS	DLGAP1	0.816	0.001
SOX2OT	WDR64	0.816	0.001
[truncated: 17,111 more rows]

## Sheet: TAB S7
TABLE S7:PATHWAYS ENRICHMENT ANALYSIS OF HF-MODULATED mRNAs CORRELATING WITH HF-MODULATED lncRNAs
number of reference genes in the category (C), number of genes in the gene set and also in the category (O), expected number in the
category (E), Ratio of enrichment (R), p value from hypergeometric test (rawP), and p value adjusted by the multiple test adjustment (adjP).
CDKN2B-AS1
Pathway Commons pathway	Beta1 integrin cell surface interactions	DB_ID:1517
C=1351;O=134;E=40.79;R=3.29;rawP=8.24e-34;adjP=5.72e-31
KDR	NA	KDR	kinase insert domain receptor (a type III receptor tyrosine kinase)	3791	ENSG00000128052
EGF	NA	EGF	epidermal growth factor	1950	ENSG00000138798
ASAP2	NA	ASAP2	ArfGAP with SH3 domain, ankyrin repeat and PH domain 2	8853	ENSG00000151693
NPNT	NA	NPNT	nephronectin	255743	ENSG00000168743
ITSN1	NA	ITSN1	intersectin 1 (SH3 domain protein)	6453	ENSG00000205726
SP5	NA	SP5	Sp5 transcription factor	389058	ENSG00000204335
PDGFRB	NA	PDGFRB	platelet-derived growth factor receptor, beta polypeptide	5159	ENSG00000113721
PTPRK	NA	PTPRK	protein tyrosine phosphatase, receptor type, K	5796	ENSG00000152894
LAMA4	NA	LAMA4	laminin, alpha 4	3910	ENSG00000112769
USO1	NA	USO1	USO1 vesicle docking protein homolog (yeast)	8615	ENSG00000138768
RNF144B	NA	RNF144B	ring finger protein 144B	255488	ENSG00000137393
SESN1	NA	SESN1	sestrin 1	27244	ENSG00000080546
SH3GL1	NA	SH3GL1	SH3-domain GRB2-like 1	6455	ENSG00000141985
ITGB2	NA	ITGB2	integrin, beta 2 (complement component 3 receptor 3 and 4 subunit)	3689	ENSG00000160255
PTMA	NA	PTMA	prothymosin, alpha	5757	ENSG00000187514
GSK3B	NA	GSK3B	glycogen synthase kinase 3 beta	2932	ENSG00000082701
SMAD1	NA	SMAD1	SMAD family member 1	4086	ENSG00000170365
FN1	NA	FN1	fibronectin 1	2335	ENSG00000115414
EGR1	NA	EGR1	early growth response 1	1958	ENSG00000120738
LNPEP	NA	LNPEP	leucyl/cystinyl aminopeptidase	4012	ENSG00000113441
SDC2	NA	SDC2	syndecan 2	6383	ENSG00000169439
PPP3CB	NA	PPP3CB	protein phosphatase 3, catalytic subunit, beta isozyme	5532	ENSG00000107758
COL3A1	NA	COL3A1	collagen, type III, alpha 1	1281	ENSG00000168542
COL6A3	NA	COL6A3	collagen, type VI, alpha 3	1293	ENSG00000163359
JMY	NA	JMY	junction mediating and regulatory protein, p53 cofactor	133746	ENSG00000152409
CFLAR	NA	CFLAR	CASP8 and FADD-like apoptosis regulator	8837	ENSG00000003402
PRKCE	NA	PRKCE	protein kinase C, epsilon	5581	ENSG00000171132
JUN	NA	JUN	jun proto-oncogene	3725	ENSG00000177606
FKBP1A	NA	FKBP1A	FK506 binding protein 1A, 12kDa	2280	ENSG00000088832
VASP	NA	VASP	vasodilator-stimulated phosphoprotein	7408	ENSG00000125753
DAB2	NA	DAB2	disabled homolog 2, mitogen-responsive phosphoprotein (Drosophila)	1601	ENSG00000153071
TIMP1	NA	TIMP1	TIMP metallopeptidase inhibitor 1	7076	ENSG00000102265
GATA2	NA	GATA2	GATA binding protein 2	2624	ENSG00000179348
ARPC5	NA	ARPC5	actin related protein 2/3 complex, subunit 5, 16kDa	10092	ENSG00000162704
PRKG1	NA	PRKG1	protein kinase, cGMP-dependent, type I	5592	ENSG00000185532
GNAI2	NA	GNAI2	guanine nucleotide binding protein (G protein), alpha inhibiting activity polypeptide 2	2771	ENSG00000114353
KDELR1	NA	KDELR1	KDEL (Lys-Asp-Glu-Leu) endoplasmic reticulum protein retention receptor 1	10945	ENSG00000105438
IL17RD	NA	IL17RD	interleukin 17 receptor D	54756	ENSG00000144730
CDC25A	NA	CDC25A	cell division cycle 25 homolog A (S. pombe)	993	ENSG00000164045
LAMC1	NA	LAMC1	laminin, gamma 1 (formerly LAMB2)	3915	ENSG00000135862
RB1CC1	NA	RB1CC1	RB1-inducible coiled-coil 1	9821	ENSG00000023287
HMGCS2	NA	HMGCS2	3-hydroxy-3-methylglutaryl-CoA synthase 2 (mitochondrial)	3158	ENSG00000134240
PRDM1	NA	PRDM1	PR domain containing 1, with ZNF domain	639	ENSG00000057657
TGFBI	NA	TGFBI	transforming growth factor, beta-induced, 68kDa	7045	ENSG00000120708
TSC1	NA	TSC1	tuberous sclerosis 1	7248	ENSG00000165699
COL1A2	NA	COL1A2	collagen, type I, alpha 2	1278	ENSG00000164692
ARPC2	NA	ARPC2	actin related protein 2/3 complex, subunit 2, 34kDa	10109	ENSG00000163466
JAK3	NA	JAK3	Janus kinase 3	3718	ENSG00000105639
SUMO2	NA	SUMO2	SMT3 suppressor of mif two 3 homolog 2 (S. cerevisiae)	6613	ENSG00000188612
COL18A1	NA	COL18A1	collagen, type XVIII, alpha 1	80781	ENSG00000182871
PBX1	NA	PBX1	pre-B-cell leukemia homeobox 1	5087	ENSG00000185630
IL13RA1	NA	IL13RA1	interleukin 13 receptor, alpha 1	3597	ENSG00000131724
AIFM2	NA	AIFM2	apoptosis-inducing factor, mitochondrion-associated, 2	84883	ENSG00000042286
LYN	NA	LYN	v-yes-1 Yamaguchi sarcoma viral related oncogene homolog	4067	ENSG00000254087
HSPA1A	NA	HSPA1A	heat shock 70kDa protein 1A	3303	ENSG00000204389
TNC	NA	TNC	tenascin C	3371	ENSG00000041982
RPL11	NA	RPL11	ribosomal protein L11	6135	ENSG00000142676
CSDE1	NA	CSDE1	cold shock domain containing E1, RNA-binding	7812	ENSG00000009307
CCNA2	NA	CCNA2	cyclin A2	890	ENSG00000145386
SHC1	NA	SHC1	SHC (Src homology 2 domain containing) transforming protein 1	6464	ENSG00000160691
PLAU	NA	PLAU	plasminogen activator, urokinase	5328	ENSG00000122861
COL5A1	NA	COL5A1	collagen, type V, alpha 1	1289	ENSG00000130635
CASP8	NA	CASP8	caspase 8, apoptosis-related cysteine peptidase	841	ENSG00000064012
UBE2D1	NA	UBE2D1	ubiquitin-conjugating enzyme E2D 1	7321	ENSG00000072401
SNAI2	NA	SNAI2	snail homolog 2 (Drosophila)	6591	ENSG00000019549
COL6A2	NA	COL6A2	collagen, type VI, alpha 2	1292	ENSG00000142173
RIPK2	NA	RIPK2	receptor-interacting serine-threonine kinase 2	8767	ENSG00000104312
COL5A2	NA	COL5A2	collagen, type V, alpha 2	1290	ENSG00000204262
GJA1	NA	GJA1	gap junction protein, alpha 1, 43kDa	2697	ENSG00000152661
SAT1	NA	SAT1	spermidine/spermine N1-acetyltransferase 1	6303	ENSG00000130066
NCL	NA	NCL	nucleolin	4691	ENSG00000115053
IL10	NA	IL10	interleukin 10	3586	ENSG00000136634
CD14	NA	CD14	CD14 molecule	929	ENSG00000170458
SMYD2	NA	SMYD2	SET and MYND domain containing 2	56950	ENSG00000143499
MAP3K6	NA	MAP3K6	mitogen-activated protein kinase kinase kinase 6	9064	ENSG00000142733
PPP2CA	NA	PPP2CA	protein phosphatase 2, catalytic subunit, alpha isozyme	5515	ENSG00000113575
ADAM28	NA	ADAM28	ADAM metallopeptidase domain 28	10863	ENSG00000042980
RBL1	NA	RBL1	retinoblastoma-like 1 (p107)	5933	ENSG00000080839
KLF4	NA	KLF4	Kruppel-like factor 4 (gut)	9314	ENSG00000136826
LAMB1	NA	LAMB1	laminin, beta 1	3912	ENSG00000091136
NCK2	NA	NCK2	NCK adaptor protein 2	8440	ENSG00000071051
HGF	NA	HGF	hepatocyte growth factor (hepapoietin A; scatter factor)	3082	ENSG00000019991
RCAN2	NA	RCAN2	regulator of calcineurin 2	10231	ENSG00000172348
MAPK12	NA	MAPK12	mitogen-activated protein kinase 12	6300	ENSG00000188130
CTDSP1	NA	CTDSP1	CTD (carboxy-terminal domain, RNA polymerase II, polypeptide A) small phosphatase 1	58190	ENSG00000144579
TNIK	NA	TNIK	TRAF2 and NCK interacting kinase	23043	ENSG00000154310
TFF3	NA	TFF3	trefoil factor 3 (intestinal)	7033	ENSG00000160180
CCM2	NA	CCM2	cerebral cavernous malformation 2	83605	ENSG00000136280
TGFBR1	NA	TGFBR1	transforming growth factor, beta receptor 1	7046	ENSG00000106799
COL4A5	NA	COL4A5	collagen, type IV, alpha 5	1287	ENSG00000188153
MLH1	NA	MLH1	mutL homolog 1, colon cancer, nonpolyposis type 2 (E. coli)	4292	ENSG00000076242
ARF1	NA	ARF1	ADP-ribosylation factor 1	375	ENSG00000143761
ACTN2	NA	ACTN2	actinin, alpha 2	88	ENSG00000077522
SFXN3	NA	SFXN3	sideroflexin 3	81855	ENSG00000107819
BMP6	NA	BMP6	bone morphogenetic protein 6	654	ENSG00000153162
GDI1	NA	GDI1	GDP dissociation inhibitor 1	2664	ENSG00000203879
CAPN2	NA	CAPN2	calpain 2, (m/II) large subunit	824	ENSG00000162909
PTPN1	NA	PTPN1	protein tyrosine phosphatase, non-receptor type 1	5770	ENSG00000196396
HUWE1	NA	HUWE1	HECT, UBA and WWE domain containing 1, E3 ubiquitin protein ligase	10075	ENSG00000086758
SETD8	NA	SETD8	SET domain containing (lysine methyltransferase) 8	387893	ENSG00000183955
CCND3	NA	CCND3	cyclin D3	896	ENSG00000112576
BAX	NA	BAX	BCL2-associated X protein	581	ENSG00000087088
DCP1A	NA	DCP1A	DCP1 decapping enzyme homolog A (S. cerevisiae)	55802	NULL
ADAM15	NA	ADAM15	ADAM metallopeptidase domain 15	8751	ENSG00000143537
WWP1	NA	WWP1	WW domain containing E3 ubiquitin protein ligase 1	11059	ENSG00000123124
LSP1	NA	LSP1	lymphocyte-specific protein 1	4046	ENSG00000130592
CXCL12	NA	CXCL12	chemokine (C-X-C motif) ligand 12	6387	ENSG00000107562
NCOA2	NA	NCOA2	nuclear receptor coactivator 2	10499	ENSG00000140396
TGFB1	NA	TGFB1	transforming growth factor, beta 1	7040	ENSG00000105329
PPP3CA	NA	PPP3CA	protein phosphatase 3, catalytic subunit, alpha isozyme	5530	ENSG00000138814
HES1	NA	HES1	hairy and enhancer of split 1, (Drosophila)	3280	ENSG00000114315
RBBP7	NA	RBBP7	retinoblastoma binding protein 7	5931	ENSG00000102054
TNFAIP3	NA	TNFAIP3	tumor necrosis factor, alpha-induced protein 3	7128	ENSG00000118503
FOXO4	NA	FOXO4	forkhead box O4	4303	ENSG00000184481
THBS2	NA	THBS2	thrombospondin 2	7058	ENSG00000186340
PLAUR	NA	PLAUR	plasminogen activator, urokinase receptor	5329	ENSG00000011422
PIK3R1	NA	PIK3R1	phosphoinositide-3-kinase, regulatory subunit 1 (alpha)	5295	ENSG00000145675
SKP2	NA	SKP2	S-phase kinase-associated protein 2, E3 ubiquitin protein ligase	6502	ENSG00000145604
ADAM12	NA	ADAM12	ADAM metallopeptidase domain 12	8038	ENSG00000148848
HSPA1B	NA	HSPA1B	heat shock 70kDa protein 1B	3304	ENSG00000204388
BCL10	NA	BCL10	B-cell CLL/lymphoma 10	8915	ENSG00000142867
GPLD1	NA	GPLD1	glycosylphosphatidylinositol specific phospholipase D1	2822	ENSG00000112293
IFNA21	NA	IFNA21	interferon, alpha 21	3452	ENSG00000137080
GNA12	NA	GNA12	guanine nucleotide binding protein (G protein) alpha 12	2768	ENSG00000146535
CXCR4	NA	CXCR4	chemokine (C-X-C motif) receptor 4	7852	ENSG00000121966
ELMO1	NA	ELMO1	engulfment and cell motility 1	9844	ENSG00000155849
NCOA4	NA	NCOA4	nuclear receptor coactivator 4	8031	ENSG00000138293
PRDX3	NA	PRDX3	peroxiredoxin 3	10935	ENSG00000165672
AKT3	NA	AKT3	v-akt murine thymoma viral oncogene homolog 3 (protein kinase B, gamma)	10000	ENSG00000117020
CAMK2B	NA	CAMK2B	calcium/calmodulin-dependent protein kinase II beta	816	ENSG00000058404
TADA2B	NA	TADA2B	transcriptional adaptor 2B	93624	ENSG00000173011
SVIL	NA	SVIL	supervillin	6840	ENSG00000197321
ITGAV	NA	ITGAV	integrin, alpha V	3685	ENSG00000138448
BTRC	NA	BTRC	beta-transducin repeat containing E3 ubiquitin protein ligase	8945	ENSG00000166167
Pathway Commons pathway	Integrin family cell surface interactions	DB_ID:1499
C=1378;O=135;E=41.60;R=3.25;rawP=1.66e-33;adjP=5.76e-31
KDR	NA	KDR	kinase insert domain receptor (a type III receptor tyrosine kinase)	3791	ENSG00000128052
EGF	NA	EGF	epidermal growth factor	1950	ENSG00000138798
PLAT	NA	PLAT	plasminogen activator, tissue	5327	ENSG00000104368
ASAP2	NA	ASAP2	ArfGAP with SH3 domain, ankyrin repeat and PH domain 2	8853	ENSG00000151693
NPNT	NA	NPNT	nephronectin	255743	ENSG00000168743
ITSN1	NA	ITSN1	intersectin 1 (SH3 domain protein)	6453	ENSG00000205726
SP5	NA	SP5	Sp5 transcription factor	389058	ENSG00000204335
PDGFRB	NA	PDGFRB	platelet-derived growth factor receptor, beta polypeptide	5159	ENSG00000113721
PTPRK	NA	PTPRK	protein tyrosine phosphatase, receptor type, K	5796	ENSG00000152894
LAMA4	NA	LAMA4	laminin, alpha 4	3910	ENSG00000112769
USO1	NA	USO1	USO1 vesicle docking protein homolog (yeast)	8615	ENSG00000138768
RNF144B	NA	RNF144B	ring finger protein 144B	255488	ENSG00000137393
SESN1	NA	SESN1	sestrin 1	27244	ENSG00000080546
SH3GL1	NA	SH3GL1	SH3-domain GRB2-like 1	6455	ENSG00000141985
ITGB2	NA	ITGB2	integrin, beta 2 (complement component 3 receptor 3 and 4 subunit)	3689	ENSG00000160255
PTMA	NA	PTMA	prothymosin, alpha	5757	ENSG00000187514
GSK3B	NA	GSK3B	glycogen synthase kinase 3 beta	2932	ENSG00000082701
SMAD1	NA	SMAD1	SMAD family member 1	4086	ENSG00000170365
FN1	NA	FN1	fibronectin 1	2335	ENSG00000115414
EGR1	NA	EGR1	early growth response 1	1958	ENSG00000120738
LNPEP	NA	LNPEP	leucyl/cystinyl aminopeptidase	4012	ENSG00000113441
SDC2	NA	SDC2	syndecan 2	6383	ENSG00000169439
PPP3CB	NA	PPP3CB	protein phosphatase 3, catalytic subunit, beta isozyme	5532	ENSG00000107758
COL3A1	NA	COL3A1	collagen, type III, alpha 1	1281	ENSG00000168542
COL6A3	NA	COL6A3	collagen, type VI, alpha 3	1293	ENSG00000163359
JMY	NA	JMY	junction mediating and regulatory protein, p53 cofactor	133746	ENSG00000152409
CFLAR	NA	CFLAR	CASP8 and FADD-like apoptosis regulator	8837	ENSG00000003402
JUN	NA	JUN	jun proto-oncogene	3725	ENSG00000177606
FKBP1A	NA	FKBP1A	FK506 binding protein 1A, 12kDa	2280	ENSG00000088832
PRKCE	NA	PRKCE	protein kinase C, epsilon	5581	ENSG00000171132
VASP	NA	VASP	vasodilator-stimulated phosphoprotein	7408	ENSG00000125753
DAB2	NA	DAB2	disabled homolog 2, mitogen-responsive phosphoprotein (Drosophila)	1601	ENSG00000153071
TIMP1	NA	TIMP1	TIMP metallopeptidase inhibitor 1	7076	ENSG00000102265
GATA2	NA	GATA2	GATA binding protein 2	2624	ENSG00000179348
ARPC5	NA	ARPC5	actin related protein 2/3 complex, subunit 5, 16kDa	10092	ENSG00000162704
PRKG1	NA	PRKG1	protein kinase, cGMP-dependent, type I	5592	ENSG00000185532
GNAI2	NA	GNAI2	guanine nucleotide binding protein (G protein), alpha inhibiting activity polypeptide 2	2771	ENSG00000114353
KDELR1	NA	KDELR1	KDEL (Lys-Asp-Glu-Leu) endoplasmic reticulum protein retention receptor 1	10945	ENSG00000105438
IL17RD	NA	IL17RD	interleukin 17 receptor D	54756	ENSG00000144730
CDC25A	NA	CDC25A	cell division cycle 25 homolog A (S. pombe)	993	ENSG00000164045
LAMC1	NA	LAMC1	laminin, gamma 1 (formerly LAMB2)	3915	ENSG00000135862
RB1CC1	NA	RB1CC1	RB1-inducible coiled-coil 1	9821	ENSG00000023287
HMGCS2	NA	HMGCS2	3-hydroxy-3-methylglutaryl-CoA synthase 2 (mitochondrial)	3158	ENSG00000134240
PRDM1	NA	PRDM1	PR domain containing 1, with ZNF domain	639	ENSG00000057657
TGFBI	NA	TGFBI	transforming growth factor, beta-induced, 68kDa	7045	ENSG00000120708
TSC1	NA	TSC1	tuberous sclerosis 1	7248	ENSG00000165699
COL1A2	NA	COL1A2	collagen, type I, alpha 2	1278	ENSG00000164692
ARPC2	NA	ARPC2	actin related protein 2/3 complex, subunit 2, 34kDa	10109	ENSG00000163466
JAK3	NA	JAK3	Janus kinase 3	3718	ENSG00000105639
SUMO2	NA	SUMO2	SMT3 suppressor of mif two 3 homolog 2 (S. cerevisiae)	6613	ENSG00000188612
COL18A1	NA	COL18A1	collagen, type XVIII, alpha 1	80781	ENSG00000182871
PBX1	NA	PBX1	pre-B-cell leukemia homeobox 1	5087	ENSG00000185630
IL13RA1	NA	IL13RA1	interleukin 13 receptor, alpha 1	3597	ENSG00000131724
AIFM2	NA	AIFM2	apoptosis-inducing factor, mitochondrion-associated, 2	84883	ENSG00000042286
LYN	NA	LYN	v-yes-1 Yamaguchi sarcoma viral related oncogene homolog	4067	ENSG00000254087
HSPA1A	NA	HSPA1A	heat shock 70kDa protein 1A	3303	ENSG00000204389
TNC	NA	TNC	tenascin C	3371	ENSG00000041982
RPL11	NA	RPL11	ribosomal protein L11	6135	ENSG00000142676
CSDE1	NA	CSDE1	cold shock domain containing E1, RNA-binding	7812	ENSG00000009307
CCNA2	NA	CCNA2	cyclin A2	890	ENSG00000145386
SHC1	NA	SHC1	SHC (Src homology 2 domain containing) transforming protein 1	6464	ENSG00000160691
PLAU	NA	PLAU	plasminogen activator, urokinase	5328	ENSG00000122861
COL5A1	NA	COL5A1	collagen, type V, alpha 1	1289	ENSG00000130635
CASP8	NA	CASP8	caspase 8, apoptosis-related cysteine peptidase	841	ENSG00000064012
UBE2D1	NA	UBE2D1	ubiquitin-conjugating enzyme E2D 1	7321	ENSG00000072401
SNAI2	NA	SNAI2	snail homolog 2 (Drosophila)	6591	ENSG00000019549
COL6A2	NA	COL6A2	collagen, type VI, alpha 2	1292	ENSG00000142173
RIPK2	NA	RIPK2	receptor-interacting serine-threonine kinase 2	8767	ENSG00000104312
COL5A2	NA	COL5A2	collagen, type V, alpha 2	1290	ENSG00000204262
GJA1	NA	GJA1	gap junction protein, alpha 1, 43kDa	2697	ENSG00000152661
SAT1	NA	SAT1	spermidine/spermine N1-acetyltransferase 1	6303	ENSG00000130066
NCL	NA	NCL	nucleolin	4691	ENSG00000115053
IL10	NA	IL10	interleukin 10	3586	ENSG00000136634
CD14	NA	CD14	CD14 molecule	929	ENSG00000170458
SMYD2	NA	SMYD2	SET and MYND domain containing 2	56950	ENSG00000143499
MAP3K6	NA	MAP3K6	mitogen-activated protein kinase kinase kinase 6	9064	ENSG00000142733
PPP2CA	NA	PPP2CA	protein phosphatase 2, catalytic subunit, alpha isozyme	5515	ENSG00000113575
ADAM28	NA	ADAM28	ADAM metallopeptidase domain 28	10863	ENSG00000042980
RBL1	NA	RBL1	retinoblastoma-like 1 (p107)	5933	ENSG00000080839
KLF4	NA	KLF4	Kruppel-like factor 4 (gut)	9314	ENSG00000136826
LAMB1	NA	LAMB1	laminin, beta 1	3912	ENSG00000091136
NCK2	NA	NCK2	NCK adaptor protein 2	8440	ENSG00000071051
HGF	NA	HGF	hepatocyte growth factor (hepapoietin A; scatter factor)	3082	ENSG00000019991
RCAN2	NA	RCAN2	regulator of calcineurin 2	10231	ENSG00000172348
MAPK12	NA	MAPK12	mitogen-activated protein kinase 12	6300	ENSG00000188130
CTDSP1	NA	CTDSP1	CTD (carboxy-terminal domain, RNA polymerase II, polypeptide A) small phosphatase 1	58190	ENSG00000144579
TNIK	NA	TNIK	TRAF2 and NCK interacting kinase	23043	ENSG00000154310
TFF3	NA	TFF3	trefoil factor 3 (intestinal)	7033	ENSG00000160180
CCM2	NA	CCM2	cerebral cavernous malformation 2	83605	ENSG00000136280
TGFBR1	NA	TGFBR1	transforming growth factor, beta receptor 1	7046	ENSG00000106799
COL4A5	NA	COL4A5	collagen, type IV, alpha 5	1287	ENSG00000188153
MLH1	NA	MLH1	mutL homolog 1, colon cancer, nonpolyposis type 2 (E. coli)	4292	ENSG00000076242
ARF1	NA	ARF1	ADP-ribosylation factor 1	375	ENSG00000143761
ACTN2	NA	ACTN2	actinin, alpha 2	88	ENSG00000077522
SFXN3	NA	SFXN3	sideroflexin 3	81855	ENSG00000107819
BMP6	NA	BMP6	bone morphogenetic protein 6	654	ENSG00000153162
GDI1	NA	GDI1	GDP dissociation inhibitor 1	2664	ENSG00000203879
CAPN2	NA	CAPN2	calpain 2, (m/II) large subunit	824	ENSG00000162909
PTPN1	NA	PTPN1	protein tyrosine phosphatase, non-receptor type 1	5770	ENSG00000196396
HUWE1	NA	HUWE1	HECT, UBA and WWE domain containing 1, E3 ubiquitin protein ligase	10075	ENSG00000086758
SETD8	NA	SETD8	SET domain containing (lysine methyltransferase) 8	387893	ENSG00000183955
CCND3	NA	CCND3	cyclin D3	896	ENSG00000112576
BAX	NA	BAX	BCL2-associated X protein	581	ENSG00000087088
DCP1A	NA	DCP1A	DCP1 decapping enzyme homolog A (S. cerevisiae)	55802	NULL
ADAM15	NA	ADAM15	ADAM metallopeptidase domain 15	8751	ENSG00000143537
WWP1	NA	WWP1	WW domain containing E3 ubiquitin protein ligase 1	11059	ENSG00000123124
LSP1	NA	LSP1	lymphocyte-specific protein 1	4046	ENSG00000130592
CXCL12	NA	CXCL12	chemokine (C-X-C motif) ligand 12	6387	ENSG00000107562
NCOA2	NA	NCOA2	nuclear receptor coactivator 2	10499	ENSG00000140396
TGFB1	NA	TGFB1	transforming growth factor, beta 1	7040	ENSG00000105329
PPP3CA	NA	PPP3CA	protein phosphatase 3, catalytic subunit, alpha isozyme	5530	ENSG00000138814
HES1	NA	HES1	hairy and enhancer of split 1, (Drosophila)	3280	ENSG00000114315
RBBP7	NA	RBBP7	retinoblastoma binding protein 7	5931	ENSG00000102054
TNFAIP3	NA	TNFAIP3	tumor necrosis factor, alpha-induced protein 3	7128	ENSG00000118503
FOXO4	NA	FOXO4	forkhead box O4	4303	ENSG00000184481
THBS2	NA	THBS2	thrombospondin 2	7058	ENSG00000186340
PLAUR	NA	PLAUR	plasminogen activator, urokinase receptor	5329	ENSG00000011422
PIK3R1	NA	PIK3R1	phosphoinositide-3-kinase, regulatory subunit 1 (alpha)	5295	ENSG00000145675
SKP2	NA	SKP2	S-phase kinase-associated protein 2, E3 ubiquitin protein ligase	6502	ENSG00000145604
ADAM12	NA	ADAM12	ADAM metallopeptidase domain 12	8038	ENSG00000148848
HSPA1B	NA	HSPA1B	heat shock 70kDa protein 1B	3304	ENSG00000204388
BCL10	NA	BCL10	B-cell CLL/lymphoma 10	8915	ENSG00000142867
GPLD1	NA	GPLD1	glycosylphosphatidylinositol specific phospholipase D1	2822	ENSG00000112293
IFNA21	NA	IFNA21	interferon, alpha 21	3452	ENSG00000137080
GNA12	NA	GNA12	guanine nucleotide binding protein (G protein) alpha 12	2768	ENSG00000146535
CXCR4	NA	CXCR4	chemokine (C-X-C motif) receptor 4	7852	ENSG00000121966
ELMO1	NA	ELMO1	engulfment and cell motility 1	9844	ENSG00000155849
PRDX3	NA	PRDX3	peroxiredoxin 3	10935	ENSG00000165672
NCOA4	NA	NCOA4	nuclear receptor coactivator 4	8031	ENSG00000138293
AKT3	NA	AKT3	v-akt murine thymoma viral oncogene homolog 3 (protein kinase B, gamma)	10000	ENSG00000117020
CAMK2B	NA	CAMK2B	calcium/calmodulin-dependent protein kinase II beta	816	ENSG00000058404
TADA2B	NA	TADA2B	transcriptional adaptor 2B	93624	ENSG00000173011
SVIL	NA	SVIL	supervillin	6840	ENSG00000197321
ITGAV	NA	ITGAV	integrin, alpha V	3685	ENSG00000138448
BTRC	NA	BTRC	beta-transducin repeat containing E3 ubiquitin protein ligase	8945	ENSG00000166167
Pathway Commons pathway	Glypican pathway	DB_ID:1459
C=1338;O=124;E=40.39;R=3.07;rawP=1.53e-28;adjP=3.54e-26
KDR	NA	KDR	kinase insert domain receptor (a type III receptor tyrosine kinase)	3791	ENSG00000128052
SUMO2	NA	SUMO2	SMT3 suppressor of mif two 3 homolog 2 (S. cerevisiae)	6613	ENSG00000188612
EGF	NA	EGF	epidermal growth factor	1950	ENSG00000138798
PBX1	NA	PBX1	pre-B-cell leukemia homeobox 1	5087	ENSG00000185630
COL18A1	NA	COL18A1	collagen, type XVIII, alpha 1	80781	ENSG00000182871
IL13RA1	NA	IL13RA1	interleukin 13 receptor, alpha 1	3597	ENSG00000131724
LYN	NA	LYN	v-yes-1 Yamaguchi sarcoma viral related oncogene homolog	4067	ENSG00000254087
AIFM2	NA	AIFM2	apoptosis-inducing factor, mitochondrion-associated, 2	84883	ENSG00000042286
HSPA1A	NA	HSPA1A	heat shock 70kDa protein 1A	3303	ENSG00000204389
RPL11	NA	RPL11	ribosomal protein L11	6135	ENSG00000142676
CSDE1	NA	CSDE1	cold shock domain containing E1, RNA-binding	7812	ENSG00000009307
CCNA2	NA	CCNA2	cyclin A2	890	ENSG00000145386
ASAP2	NA	ASAP2	ArfGAP with SH3 domain, ankyrin repeat and PH domain 2	8853	ENSG00000151693
PLAU	NA	PLAU	plasminogen activator, urokinase	5328	ENSG00000122861
SHC1	NA	SHC1	SHC (Src homology 2 domain containing) transforming protein 1	6464	ENSG00000160691
UBE2D1	NA	UBE2D1	ubiquitin-conjugating enzyme E2D 1	7321	ENSG00000072401
CASP8	NA	CASP8	caspase 8, apoptosis-related cysteine peptidase	841	ENSG00000064012
SNAI2	NA	SNAI2	snail homolog 2 (Drosophila)	6591	ENSG00000019549
ITSN1	NA	ITSN1	intersectin 1 (SH3 domain protein)	6453	ENSG00000205726
SP5	NA	SP5	Sp5 transcription factor	389058	ENSG00000204335
PDGFRB	NA	PDGFRB	platelet-derived growth factor receptor, beta polypeptide	5159	ENSG00000113721
PTPRK	NA	PTPRK	protein tyrosine phosphatase, receptor type, K	5796	ENSG00000152894
FZD1	NA	FZD1	frizzled family receptor 1	8321	ENSG00000157240
USO1	NA	USO1	USO1 vesicle docking protein homolog (yeast)	8615	ENSG00000138768
GJA1	NA	GJA1	gap junction protein, alpha 1, 43kDa	2697	ENSG00000152661
RIPK2	NA	RIPK2	receptor-interacting serine-threonine kinase 2	8767	ENSG00000104312
RNF144B	NA	RNF144B	ring finger protein 144B	255488	ENSG00000137393
WNT7A	NA	WNT7A	wingless-type MMTV integration site family, member 7A	7476	ENSG00000154764
NCL	NA	NCL	nucleolin	4691	ENSG00000115053
IL10	NA	IL10	interleukin 10	3586	ENSG00000136634
SMYD2	NA	SMYD2	SET and MYND domain containing 2	56950	ENSG00000143499
SESN1	NA	SESN1	sestrin 1	27244	ENSG00000080546
MAP3K6	NA	MAP3K6	mitogen-activated protein kinase kinase kinase 6	9064	ENSG00000142733
SH3GL1	NA	SH3GL1	SH3-domain GRB2-like 1	6455	ENSG00000141985
ITGB2	NA	ITGB2	integrin, beta 2 (complement component 3 receptor 3 and 4 subunit)	3689	ENSG00000160255
PPP2CA	NA	PPP2CA	protein phosphatase 2, catalytic subunit, alpha isozyme	5515	ENSG00000113575
RBL1	NA	RBL1	retinoblastoma-like 1 (p107)	5933	ENSG00000080839
KLF4	NA	KLF4	Kruppel-like factor 4 (gut)	9314	ENSG00000136826
PTMA	NA	PTMA	prothymosin, alpha	5757	ENSG00000187514
NCK2	NA	NCK2	NCK adaptor protein 2	8440	ENSG00000071051
GSK3B	NA	GSK3B	glycogen synthase kinase 3 beta	2932	ENSG00000082701
RCAN2	NA	RCAN2	regulator of calcineurin 2	10231	ENSG00000172348
HGF	NA	HGF	hepatocyte growth factor (hepapoietin A; scatter factor)	3082	ENSG00000019991
SMAD1	NA	SMAD1	SMAD family member 1	4086	ENSG00000170365
CTDSP1	NA	CTDSP1	CTD (carboxy-terminal domain, RNA polymerase II, polypeptide A) small phosphatase 1	58190	ENSG00000144579
MAPK12	NA	MAPK12	mitogen-activated protein kinase 12	6300	ENSG00000188130
TNIK	NA	TNIK	TRAF2 and NCK interacting kinase	23043	ENSG00000154310
CTHRC1	NA	CTHRC1	collagen triple helix repeat containing 1	115908	ENSG00000164932
FN1	NA	FN1	fibronectin 1	2335	ENSG00000115414
EGR1	NA	EGR1	early growth response 1	1958	ENSG00000120738
TFF3	NA	TFF3	trefoil factor 3 (intestinal)	7033	ENSG00000160180
FZD8	NA	FZD8	frizzled family receptor 8	8325	ENSG00000177283
LNPEP	NA	LNPEP	leucyl/cystinyl aminopeptidase	4012	ENSG00000113441
CCM2	NA	CCM2	cerebral cavernous malformation 2	83605	ENSG00000136280
SDC2	NA	SDC2	syndecan 2	6383	ENSG00000169439
TGFBR1	NA	TGFBR1	transforming growth factor, beta receptor 1	7046	ENSG00000106799
ACTN2	NA	ACTN2	actinin, alpha 2	88	ENSG00000077522
ARF1	NA	ARF1	ADP-ribosylation factor 1	375	ENSG00000143761
PPP3CB	NA	PPP3CB	protein phosphatase 3, catalytic subunit, beta isozyme	5532	ENSG00000107758
MLH1	NA	MLH1	mutL homolog 1, colon cancer, nonpolyposis type 2 (E. coli)	4292	ENSG00000076242
SFXN3	NA	SFXN3	sideroflexin 3	81855	ENSG00000107819
BMP6	NA	BMP6	bone morphogenetic protein 6	654	ENSG00000153162
JMY	NA	JMY	junction mediating and regulatory protein, p53 cofactor	133746	ENSG00000152409
CFLAR	NA	CFLAR	CASP8 and FADD-like apoptosis regulator	8837	ENSG00000003402
GDI1	NA	GDI1	GDP dissociation inhibitor 1	2664	ENSG00000203879
PRKCE	NA	PRKCE	protein kinase C, epsilon	5581	ENSG00000171132
JUN	NA	JUN	jun proto-oncogene	3725	ENSG00000177606
FKBP1A	NA	FKBP1A	FK506 binding protein 1A, 12kDa	2280	ENSG00000088832
CAPN2	NA	CAPN2	calpain 2, (m/II) large subunit	824	ENSG00000162909
PTPN1	NA	PTPN1	protein tyrosine phosphatase, non-receptor type 1	5770	ENSG00000196396
VASP	NA	VASP	vasodilator-stimulated phosphoprotein	7408	ENSG00000125753
DAB2	NA	DAB2	disabled homolog 2, mitogen-responsive phosphoprotein (Drosophila)	1601	ENSG00000153071
TIMP1	NA	TIMP1	TIMP metallopeptidase inhibitor 1	7076	ENSG00000102265
GATA2	NA	GATA2	GATA binding protein 2	2624	ENSG00000179348
ARPC5	NA	ARPC5	actin related protein 2/3 complex, subunit 5, 16kDa	10092	ENSG00000162704
HUWE1	NA	HUWE1	HECT, UBA and WWE domain containing 1, E3 ubiquitin protein ligase	10075	ENSG00000086758
SETD8	NA	SETD8	SET domain containing (lysine methyltransferase) 8	387893	ENSG00000183955
GPC3	NA	GPC3	glypican 3	2719	ENSG00000147257
CCND3	NA	CCND3	cyclin D3	896	ENSG00000112576
PRKG1	NA	PRKG1	protein kinase, cGMP-dependent, type I	5592	ENSG00000185532
BAX	NA	BAX	BCL2-associated X protein	581	ENSG00000087088
DCP1A	NA	DCP1A	DCP1 decapping enzyme homolog A (S. cerevisiae)	55802	NULL
LSP1	NA	LSP1	lymphocyte-specific protein 1	4046	ENSG00000130592
WWP1	NA	WWP1	WW domain containing E3 ubiquitin protein ligase 1	11059	ENSG00000123124
CXCL12	NA	CXCL12	chemokine (C-X-C motif) ligand 12	6387	ENSG00000107562
GNAI2	NA	GNAI2	guanine nucleotide binding protein (G protein), alpha inhibiting activity polypeptide 2	2771	ENSG00000114353
NCOA2	NA	NCOA2	nuclear receptor coactivator 2	10499	ENSG00000140396
KDELR1	NA	KDELR1	KDEL (Lys-Asp-Glu-Leu) endoplasmic reticulum protein retention receptor 1	10945	ENSG00000105438
TGFB1	NA	TGFB1	transforming growth factor, beta 1	7040	ENSG00000105329
HES1	NA	HES1	hairy and enhancer of split 1, (Drosophila)	3280	ENSG00000114315
IL17RD	NA	IL17RD	interleukin 17 receptor D	54756	ENSG00000144730
CDC25A	NA	CDC25A	cell division cycle 25 homolog A (S. pombe)	993	ENSG00000164045
PPP3CA	NA	PPP3CA	protein phosphatase 3, catalytic subunit, alpha isozyme	5530	ENSG00000138814
FOXO4	NA	FOXO4	forkhead box O4	4303	ENSG00000184481
LAMC1	NA	LAMC1	laminin, gamma 1 (formerly LAMB2)	3915	ENSG00000135862
TNFAIP3	NA	TNFAIP3	tumor necrosis factor, alpha-induced protein 3	7128	ENSG00000118503
RBBP7	NA	RBBP7	retinoblastoma binding protein 7	5931	ENSG00000102054
RB1CC1	NA	RB1CC1	RB1-inducible coiled-coil 1	9821	ENSG00000023287
PLAUR	NA	PLAUR	plasminogen activator, urokinase receptor	5329	ENSG00000011422
PIK3R1	NA	PIK3R1	phosphoinositide-3-kinase, regulatory subunit 1 (alpha)	5295	ENSG00000145675
SKP2	NA	SKP2	S-phase kinase-associated protein 2, E3 ubiquitin protein ligase	6502	ENSG00000145604
HMGCS2	NA	HMGCS2	3-hydroxy-3-methylglutaryl-CoA synthase 2 (mitochondrial)	3158	ENSG00000134240
PRDM1	NA	PRDM1	PR domain containing 1, with ZNF domain	639	ENSG00000057657
HSPA1B	NA	HSPA1B	heat shock 70kDa protein 1B	3304	ENSG00000204388
BCL10	NA	BCL10	B-cell CLL/lymphoma 10	8915	ENSG00000142867
PI4K2A	NA	PI4K2A	phosphatidylinositol 4-kinase type 2 alpha	55361	ENSG00000155252,ENSG00000249967
GPLD1	NA	GPLD1	glycosylphosphatidylinositol specific phospholipase D1	2822	ENSG00000112293
IFNA21	NA	IFNA21	interferon, alpha 21	3452	ENSG00000137080
TSC1	NA	TSC1	tuberous sclerosis 1	7248	ENSG00000165699
GNA12	NA	GNA12	guanine nucleotide binding protein (G protein) alpha 12	2768	ENSG00000146535
CXCR4	NA	CXCR4	chemokine (C-X-C motif) receptor 4	7852	ENSG00000121966
GPC2	NA	GPC2	glypican 2	221914	ENSG00000213420
ELMO1	NA	ELMO1	engulfment and cell motility 1	9844	ENSG00000155849
PRDX3	NA	PRDX3	peroxiredoxin 3	10935	ENSG00000165672
NCOA4	NA	NCOA4	nuclear receptor coactivator 4	8031	ENSG00000138293
AKT3	NA	AKT3	v-akt murine thymoma viral oncogene homolog 3 (protein kinase B, gamma)	10000	ENSG00000117020
CAMK2B	NA	CAMK2B	calcium/calmodulin-dependent protein kinase II beta	816	ENSG00000058404
TADA2B	NA	TADA2B	transcriptional adaptor 2B	93624	ENSG00000173011
SVIL	NA	SVIL	supervillin	6840	ENSG00000197321
ITGAV	NA	ITGAV	integrin, alpha V	3685	ENSG00000138448
COL1A2	NA	COL1A2	collagen, type I, alpha 2	1278	ENSG00000164692
ARPC2	NA	ARPC2	actin related protein 2/3 complex, subunit 2, 34kDa	10109	ENSG00000163466
JAK3	NA	JAK3	Janus kinase 3	3718	ENSG00000105639
BTRC	NA	BTRC	beta-transducin repeat containing E3 ubiquitin protein ligase	8945	ENSG00000166167
Pathway Commons pathway	Proteoglycan syndecan-mediated signaling events	DB_ID:1637
C=1345;O=123;E=40.61;R=3.03;rawP=8.67e-28;adjP=1.11e-25
KDR	NA	KDR	kinase insert domain receptor (a type III receptor tyrosine kinase)	3791	ENSG00000128052
SUMO2	NA	SUMO2	SMT3 suppressor of mif two 3 homolog 2 (S. cerevisiae)	6613	ENSG00000188612
EGF	NA	EGF	epidermal growth factor	1950	ENSG00000138798
PBX1	NA	PBX1	pre-B-cell leukemia homeobox 1	5087	ENSG00000185630
COL18A1	NA	COL18A1	collagen, type XVIII, alpha 1	80781	ENSG00000182871
IL13RA1	NA	IL13RA1	interleukin 13 receptor, alpha 1	3597	ENSG00000131724
LYN	NA	LYN	v-yes-1 Yamaguchi sarcoma viral related oncogene homolog	4067	ENSG00000254087
AIFM2	NA	AIFM2	apoptosis-inducing factor, mitochondrion-associated, 2	84883	ENSG00000042286
TNC	NA	TNC	tenascin C	3371	ENSG00000041982
HSPA1A	NA	HSPA1A	heat shock 70kDa protein 1A	3303	ENSG00000204389
RPL11	NA	RPL11	ribosomal protein L11	6135	ENSG00000142676
CSDE1	NA	CSDE1	cold shock domain containing E1, RNA-binding	7812	ENSG00000009307
CCNA2	NA	CCNA2	cyclin A2	890	ENSG00000145386
ASAP2	NA	ASAP2	ArfGAP with SH3 domain, ankyrin repeat and PH domain 2	8853	ENSG00000151693
PLAU	NA	PLAU	plasminogen activator, urokinase	5328	ENSG00000122861
SHC1	NA	SHC1	SHC (Src homology 2 domain containing) transforming protein 1	6464	ENSG00000160691
UBE2D1	NA	UBE2D1	ubiquitin-conjugating enzyme E2D 1	7321	ENSG00000072401
CASP8	NA	CASP8	caspase 8, apoptosis-related cysteine peptidase	841	ENSG00000064012
SNAI2	NA	SNAI2	snail homolog 2 (Drosophila)	6591	ENSG00000019549
ITSN1	NA	ITSN1	intersectin 1 (SH3 domain protein)	6453	ENSG00000205726
SP5	NA	SP5	Sp5 transcription factor	389058	ENSG00000204335
PDGFRB	NA	PDGFRB	platelet-derived growth factor receptor, beta polypeptide	5159	ENSG00000113721
PTPRK	NA	PTPRK	protein tyrosine phosphatase, receptor type, K	5796	ENSG00000152894
USO1	NA	USO1	USO1 vesicle docking protein homolog (yeast)	8615	ENSG00000138768
GJA1	NA	GJA1	gap junction protein, alpha 1, 43kDa	2697	ENSG00000152661
RIPK2	NA	RIPK2	receptor-interacting serine-threonine kinase 2	8767	ENSG00000104312
RNF144B	NA	RNF144B	ring finger protein 144B	255488	ENSG00000137393
EZR	NA	EZR	ezrin	7430	ENSG00000092820
NCL	NA	NCL	nucleolin	4691	ENSG00000115053
IL10	NA	IL10	interleukin 10	3586	ENSG00000136634
SMYD2	NA	SMYD2	SET and MYND domain containing 2	56950	ENSG00000143499
SESN1	NA	SESN1	sestrin 1	27244	ENSG00000080546
MAP3K6	NA	MAP3K6	mitogen-activated protein kinase kinase kinase 6	9064	ENSG00000142733
SH3GL1	NA	SH3GL1	SH3-domain GRB2-like 1	6455	ENSG00000141985
ITGB2	NA	ITGB2	integrin, beta 2 (complement component 3 receptor 3 and 4 subunit)	3689	ENSG00000160255
PPP2CA	NA	PPP2CA	protein phosphatase 2, catalytic subunit, alpha isozyme	5515	ENSG00000113575
RBL1	NA	RBL1	retinoblastoma-like 1 (p107)	5933	ENSG00000080839
KLF4	NA	KLF4	Kruppel-like factor 4 (gut)	9314	ENSG00000136826
PTMA	NA	PTMA	prothymosin, alpha	5757	ENSG00000187514
NCK2	NA	NCK2	NCK adaptor protein 2	8440	ENSG00000071051
GSK3B	NA	GSK3B	glycogen synthase kinase 3 beta	2932	ENSG00000082701
RCAN2	NA	RCAN2	regulator of calcineurin 2	10231	ENSG00000172348
HGF	NA	HGF	hepatocyte growth factor (hepapoietin A; scatter factor)	3082	ENSG00000019991
SMAD1	NA	SMAD1	SMAD family member 1	4086	ENSG00000170365
PTN	NA	PTN	pleiotrophin	5764	ENSG00000105894
CTDSP1	NA	CTDSP1	CTD (carboxy-terminal domain, RNA polymerase II, polypeptide A) small phosphatase 1	58190	ENSG00000144579
MAPK12	NA	MAPK12	mitogen-activated protein kinase 12	6300	ENSG00000188130
TNIK	NA	TNIK	TRAF2 and NCK interacting kinase	23043	ENSG00000154310
CTHRC1	NA	CTHRC1	collagen triple helix repeat containing 1	115908	ENSG00000164932
FN1	NA	FN1	fibronectin 1	2335	ENSG00000115414
EGR1	NA	EGR1	early growth response 1	1958	ENSG00000120738
TFF3	NA	TFF3	trefoil factor 3 (intestinal)	7033	ENSG00000160180
LNPEP	NA	LNPEP	leucyl/cystinyl aminopeptidase	4012	ENSG00000113441
CCM2	NA	CCM2	cerebral cavernous malformation 2	83605	ENSG00000136280
SDC2	NA	SDC2	syndecan 2	6383	ENSG00000169439
TGFBR1	NA	TGFBR1	transforming growth factor, beta receptor 1	7046	ENSG00000106799
ACTN2	NA	ACTN2	actinin, alpha 2	88	ENSG00000077522
ARF1	NA	ARF1	ADP-ribosylation factor 1	375	ENSG00000143761
PPP3CB	NA	PPP3CB	protein phosphatase 3, catalytic subunit, beta isozyme	5532	ENSG00000107758
MLH1	NA	MLH1	mutL homolog 1, colon cancer, nonpolyposis type 2 (E. coli)	4292	ENSG00000076242
SFXN3	NA	SFXN3	sideroflexin 3	81855	ENSG00000107819
BMP6	NA	BMP6	bone morphogenetic protein 6	654	ENSG00000153162
JMY	NA	JMY	junction mediating and regulatory protein, p53 cofactor	133746	ENSG00000152409
CFLAR	NA	CFLAR	CASP8 and FADD-like apoptosis regulator	8837	ENSG00000003402
GDI1	NA	GDI1	GDP dissociation inhibitor 1	2664	ENSG00000203879
PRKCE	NA	PRKCE	protein kinase C, epsilon	5581	ENSG00000171132
JUN	NA	JUN	jun proto-oncogene	3725	ENSG00000177606
FKBP1A	NA	FKBP1A	FK506 binding protein 1A, 12kDa	2280	ENSG00000088832
CAPN2	NA	CAPN2	calpain 2, (m/II) large subunit	824	ENSG00000162909
PTPN1	NA	PTPN1	protein tyrosine phosphatase, non-receptor type 1	5770	ENSG00000196396
VASP	NA	VASP	vasodilator-stimulated phosphoprotein	7408	ENSG00000125753
DAB2	NA	DAB2	disabled homolog 2, mitogen-responsive phosphoprotein (Drosophila)	1601	ENSG00000153071
TIMP1	NA	TIMP1	TIMP metallopeptidase inhibitor 1	7076	ENSG00000102265
GATA2	NA	GATA2	GATA binding protein 2	2624	ENSG00000179348
ARPC5	NA	ARPC5	actin related protein 2/3 complex, subunit 5, 16kDa	10092	ENSG00000162704
HUWE1	NA	HUWE1	HECT, UBA and WWE domain containing 1, E3 ubiquitin protein ligase	10075	ENSG00000086758
SETD8	NA	SETD8	SET domain containing (lysine methyltransferase) 8	387893	ENSG00000183955
CCND3	NA	CCND3	cyclin D3	896	ENSG00000112576
PRKG1	NA	PRKG1	protein kinase, cGMP-dependent, type I	5592	ENSG00000185532
BAX	NA	BAX	BCL2-associated X protein	581	ENSG00000087088
DCP1A	NA	DCP1A	DCP1 decapping enzyme homolog A (S. cerevisiae)	55802	NULL
LSP1	NA	LSP1	lymphocyte-specific protein 1	4046	ENSG00000130592
WWP1	NA	WWP1	WW domain containing E3 ubiquitin protein ligase 1	11059	ENSG00000123124
CXCL12	NA	CXCL12	chemokine (C-X-C motif) ligand 12	6387	ENSG00000107562
GNAI2	NA	GNAI2	guanine nucleotide binding protein (G protein), alpha inhibiting activity polypeptide 2	2771	ENSG00000114353
NCOA2	NA	NCOA2	nuclear receptor coactivator 2	10499	ENSG00000140396
KDELR1	NA	KDELR1	KDEL (Lys-Asp-Glu-Leu) endoplasmic reticulum protein retention receptor 1	10945	ENSG00000105438
TGFB1	NA	TGFB1	transforming growth factor, beta 1	7040	ENSG00000105329
HES1	NA	HES1	hairy and enhancer of split 1, (Drosophila)	3280	ENSG00000114315
IL17RD	NA	IL17RD	interleukin 17 receptor D	54756	ENSG00000144730
CDC25A	NA	CDC25A	cell division cycle 25 homolog A (S. pombe)	993	ENSG00000164045
PPP3CA	NA	PPP3CA	protein phosphatase 3, catalytic subunit, alpha isozyme	5530	ENSG00000138814
FOXO4	NA	FOXO4	forkhead box O4	4303	ENSG00000184481
LAMC1	NA	LAMC1	laminin, gamma 1 (formerly LAMB2)	3915	ENSG00000135862
TNFAIP3	NA	TNFAIP3	tumor necrosis factor, alpha-induced protein 3	7128	ENSG00000118503
RBBP7	NA	RBBP7	retinoblastoma binding protein 7	5931	ENSG00000102054
RB1CC1	NA	RB1CC1	RB1-inducible coiled-coil 1	9821	ENSG00000023287
PLAUR	NA	PLAUR	plasminogen activator, urokinase receptor	5329	ENSG00000011422
PIK3R1	NA	PIK3R1	phosphoinositide-3-kinase, regulatory subunit 1 (alpha)	5295	ENSG00000145675
SKP2	NA	SKP2	S-phase kinase-associated protein 2, E3 ubiquitin protein ligase	6502	ENSG00000145604
HMGCS2	NA	HMGCS2	3-hydroxy-3-methylglutaryl-CoA synthase 2 (mitochondrial)	3158	ENSG00000134240
ADAM12	NA	ADAM12	ADAM metallopeptidase domain 12	8038	ENSG00000148848
PRDM1	NA	PRDM1	PR domain containing 1, with ZNF domain	639	ENSG00000057657
HSPA1B	NA	HSPA1B	heat shock 70kDa protein 1B	3304	ENSG00000204388
BCL10	NA	BCL10	B-cell CLL/lymphoma 10	8915	ENSG00000142867
PI4K2A	NA	PI4K2A	phosphatidylinositol 4-kinase type 2 alpha	55361	ENSG00000155252,ENSG00000249967
GPLD1	NA	GPLD1	glycosylphosphatidylinositol specific phospholipase D1	2822	ENSG00000112293
IFNA21	NA	IFNA21	interferon, alpha 21	3452	ENSG00000137080
TSC1	NA	TSC1	tuberous sclerosis 1	7248	ENSG00000165699
GNA12	NA	GNA12	guanine nucleotide binding protein (G protein) alpha 12	2768	ENSG00000146535
CXCR4	NA	CXCR4	chemokine (C-X-C motif) receptor 4	7852	ENSG00000121966
ELMO1	NA	ELMO1	engulfment and cell motility 1	9844	ENSG00000155849
PRDX3	NA	PRDX3	peroxiredoxin 3	10935	ENSG00000165672
NCOA4	NA	NCOA4	nuclear receptor coactivator 4	8031	ENSG00000138293
AKT3	NA	AKT3	v-akt murine thymoma viral oncogene homolog 3 (protein kinase B, gamma)	10000	ENSG00000117020
CAMK2B	NA	CAMK2B	calcium/calmodulin-dependent protein kinase II beta	816	ENSG00000058404
TADA2B	NA	TADA2B	transcriptional adaptor 2B	93624	ENSG00000173011
SVIL	NA	SVIL	supervillin	6840	ENSG00000197321
COL1A2	NA	COL1A2	collagen, type I, alpha 2	1278	ENSG00000164692
ITGAV	NA	ITGAV	integrin, alpha V	3685	ENSG00000138448
ARPC2	NA	ARPC2	actin related protein 2/3 complex, subunit 2, 34kDa	10109	ENSG00000163466
JAK3	NA	JAK3	Janus kinase 3	3718	ENSG00000105639
BTRC	NA	BTRC	beta-transducin repeat containing E3 ubiquitin protein ligase	8945	ENSG00000166167
Pathway Commons pathway	TRAIL signaling pathway	DB_ID:1480
C=1328;O=122;E=40.09;R=3.04;rawP=9.59e-28;adjP=1.11e-25
DFFB	NA	DFFB	DNA fragmentation factor, 40kDa, beta polypeptide (caspase-activated DNase)	1677	ENSG00000169598
KDR	NA	KDR	kinase insert domain receptor (a type III receptor tyrosine kinase)	3791	ENSG00000128052
SUMO2	NA	SUMO2	SMT3 suppressor of mif two 3 homolog 2 (S. cerevisiae)	6613	ENSG00000188612
EGF	NA	EGF	epidermal growth factor	1950	ENSG00000138798
PBX1	NA	PBX1	pre-B-cell leukemia homeobox 1	5087	ENSG00000185630
COL18A1	NA	COL18A1	collagen, type XVIII, alpha 1	80781	ENSG00000182871
IL13RA1	NA	IL13RA1	interleukin 13 receptor, alpha 1	3597	ENSG00000131724
LYN	NA	LYN	v-yes-1 Yamaguchi sarcoma viral related oncogene homolog	4067	ENSG00000254087
AIFM2	NA	AIFM2	apoptosis-inducing factor, mitochondrion-associated, 2	84883	ENSG00000042286
HSPA1A	NA	HSPA1A	heat shock 70kDa protein 1A	3303	ENSG00000204389
RPL11	NA	RPL11	ribosomal protein L11	6135	ENSG00000142676
CSDE1	NA	CSDE1	cold shock domain containing E1, RNA-binding	7812	ENSG00000009307
CCNA2	NA	CCNA2	cyclin A2	890	ENSG00000145386
ASAP2	NA	ASAP2	ArfGAP with SH3 domain, ankyrin repeat and PH domain 2	8853	ENSG00000151693
PLAU	NA	PLAU	plasminogen activator, urokinase	5328	ENSG00000122861
SHC1	NA	SHC1	SHC (Src homology 2 domain containing) transforming protein 1	6464	ENSG00000160691
UBE2D1	NA	UBE2D1	ubiquitin-conjugating enzyme E2D 1	7321	ENSG00000072401
CASP8	NA	CASP8	caspase 8, apoptosis-related cysteine peptidase	841	ENSG00000064012
SNAI2	NA	SNAI2	snail homolog 2 (Drosophila)	6591	ENSG00000019549
ITSN1	NA	ITSN1	intersectin 1 (SH3 domain protein)	6453	ENSG00000205726
SP5	NA	SP5	Sp5 transcription factor	389058	ENSG00000204335
PDGFRB	NA	PDGFRB	platelet-derived growth factor receptor, beta polypeptide	5159	ENSG00000113721
PTPRK	NA	PTPRK	protein tyrosine phosphatase, receptor type, K	5796	ENSG00000152894
USO1	NA	USO1	USO1 vesicle docking protein homolog (yeast)	8615	ENSG00000138768
GJA1	NA	GJA1	gap junction protein, alpha 1, 43kDa	2697	ENSG00000152661
RIPK2	NA	RIPK2	receptor-interacting serine-threonine kinase 2	8767	ENSG00000104312
RNF144B	NA	RNF144B	ring finger protein 144B	255488	ENSG00000137393
TNFSF10	NA	TNFSF10	tumor necrosis factor (ligand) superfamily, member 10	8743	ENSG00000121858
NCL	NA	NCL	nucleolin	4691	ENSG00000115053
VIM	NA	VIM	vimentin	7431	ENSG00000026025
IL10	NA	IL10	interleukin 10	3586	ENSG00000136634
SMYD2	NA	SMYD2	SET and MYND domain containing 2	56950	ENSG00000143499
SESN1	NA	SESN1	sestrin 1	27244	ENSG00000080546
MAP3K6	NA	MAP3K6	mitogen-activated protein kinase kinase kinase 6	9064	ENSG00000142733
SH3GL1	NA	SH3GL1	SH3-domain GRB2-like 1	6455	ENSG00000141985
ITGB2	NA	ITGB2	integrin, beta 2 (complement component 3 receptor 3 and 4 subunit)	3689	ENSG00000160255
PPP2CA	NA	PPP2CA	protein phosphatase 2, catalytic subunit, alpha isozyme	5515	ENSG00000113575
RBL1	NA	RBL1	retinoblastoma-like 1 (p107)	5933	ENSG00000080839
KLF4	NA	KLF4	Kruppel-like factor 4 (gut)	9314	ENSG00000136826
PTMA	NA	PTMA	prothymosin, alpha	5757	ENSG00000187514
NCK2	NA	NCK2	NCK adaptor protein 2	8440	ENSG00000071051
GSK3B	NA	GSK3B	glycogen synthase kinase 3 beta	2932	ENSG00000082701
RCAN2	NA	RCAN2	regulator of calcineurin 2	10231	ENSG00000172348
HGF	NA	HGF	hepatocyte growth factor (hepapoietin A; scatter factor)	3082	ENSG00000019991
SMAD1	NA	SMAD1	SMAD family member 1	4086	ENSG00000170365
CTDSP1	NA	CTDSP1	CTD (carboxy-terminal domain, RNA polymerase II, polypeptide A) small phosphatase 1	58190	ENSG00000144579
MAPK12	NA	MAPK12	mitogen-activated protein kinase 12	6300	ENSG00000188130
TNIK	NA	TNIK	TRAF2 and NCK interacting kinase	23043	ENSG00000154310
FN1	NA	FN1	fibronectin 1	2335	ENSG00000115414
EGR1	NA	EGR1	early growth response 1	1958	ENSG00000120738
TFF3	NA	TFF3	trefoil factor 3 (intestinal)	7033	ENSG00000160180
LNPEP	NA	LNPEP	leucyl/cystinyl aminopeptidase	4012	ENSG00000113441
CCM2	NA	CCM2	cerebral cavernous malformation 2	83605	ENSG00000136280
SDC2	NA	SDC2	syndecan 2	6383	ENSG00000169439
AIFM1	NA	AIFM1	apoptosis-inducing factor, mitochondrion-associated, 1	9131	ENSG00000156709
TGFBR1	NA	TGFBR1	transforming growth factor, beta receptor 1	7046	ENSG00000106799
ACTN2	NA	ACTN2	actinin, alpha 2	88	ENSG00000077522
ARF1	NA	ARF1	ADP-ribosylation factor 1	375	ENSG00000143761
PPP3CB	NA	PPP3CB	protein phosphatase 3, catalytic subunit, beta isozyme	5532	ENSG00000107758
MLH1	NA	MLH1	mutL homolog 1, colon cancer, nonpolyposis type 2 (E. coli)	4292	ENSG00000076242
SFXN3	NA	SFXN3	sideroflexin 3	81855	ENSG00000107819
BMP6	NA	BMP6	bone morphogenetic protein 6	654	ENSG00000153162
JMY	NA	JMY	junction mediating and regulatory protein, p53 cofactor	133746	ENSG00000152409
CFLAR	NA	CFLAR	CASP8 and FADD-like apoptosis regulator	8837	ENSG00000003402
GDI1	NA	GDI1	GDP dissociation inhibitor 1	2664	ENSG00000203879
PRKCE	NA	PRKCE	protein kinase C, epsilon	5581	ENSG00000171132
JUN	NA	JUN	jun proto-oncogene	3725	ENSG00000177606
FKBP1A	NA	FKBP1A	FK506 binding protein 1A, 12kDa	2280	ENSG00000088832
CAPN2	NA	CAPN2	calpain 2, (m/II) large subunit	824	ENSG00000162909
PTPN1	NA	PTPN1	protein tyrosine phosphatase, non-receptor type 1	5770	ENSG00000196396
VASP	NA	VASP	vasodilator-stimulated phosphoprotein	7408	ENSG00000125753
DAB2	NA	DAB2	disabled homolog 2, mitogen-responsive phosphoprotein (Drosophila)	1601	ENSG00000153071
TIMP1	NA	TIMP1	TIMP metallopeptidase inhibitor 1	7076	ENSG00000102265
GATA2	NA	GATA2	GATA binding protein 2	2624	ENSG00000179348
ARPC5	NA	ARPC5	actin related protein 2/3 complex, subunit 5, 16kDa	10092	ENSG00000162704
HUWE1	NA	HUWE1	HECT, UBA and WWE domain containing 1, E3 ubiquitin protein ligase	10075	ENSG00000086758
SETD8	NA	SETD8	SET domain containing (lysine methyltransferase) 8	387893	ENSG00000183955
CCND3	NA	CCND3	cyclin D3	896	ENSG00000112576
PRKG1	NA	PRKG1	protein kinase, cGMP-dependent, type I	5592	ENSG00000185532
BAX	NA	BAX	BCL2-associated X protein	581	ENSG00000087088
DCP1A	NA	DCP1A	DCP1 decapping enzyme homolog A (S. cerevisiae)	55802	NULL
LSP1	NA	LSP1	lymphocyte-specific protein 1	4046	ENSG00000130592
WWP1	NA	WWP1	WW domain containing E3 ubiquitin protein ligase 1	11059	ENSG00000123124
CXCL12	NA	CXCL12	chemokine (C-X-C motif) ligand 12	6387	ENSG00000107562
GNAI2	NA	GNAI2	guanine nucleotide binding protein (G protein), alpha inhibiting activity polypeptide 2	2771	ENSG00000114353
NCOA2	NA	NCOA2	nuclear receptor coactivator 2	10499	ENSG00000140396
KDELR1	NA	KDELR1	KDEL (Lys-Asp-Glu-Leu) endoplasmic reticulum protein retention receptor 1	10945	ENSG00000105438
TGFB1	NA	TGFB1	transforming growth factor, beta 1	7040	ENSG00000105329
HES1	NA	HES1	hairy and enhancer of split 1, (Drosophila)	3280	ENSG00000114315
IL17RD	NA	IL17RD	interleukin 17 receptor D	54756	ENSG00000144730
CDC25A	NA	CDC25A	cell division cycle 25 homolog A (S. pombe)	993	ENSG00000164045
PPP3CA	NA	PPP3CA	protein phosphatase 3, catalytic subunit, alpha isozyme	5530	ENSG00000138814
FOXO4	NA	FOXO4	forkhead box O4	4303	ENSG00000184481
LAMC1	NA	LAMC1	laminin, gamma 1 (formerly LAMB2)	3915	ENSG00000135862
TNFAIP3	NA	TNFAIP3	tumor necrosis factor, alpha-induced protein 3	7128	ENSG00000118503
RBBP7	NA	RBBP7	retinoblastoma binding protein 7	5931	ENSG00000102054
RB1CC1	NA	RB1CC1	RB1-inducible coiled-coil 1	9821	ENSG00000023287
PLAUR	NA	PLAUR	plasminogen activator, urokinase receptor	5329	ENSG00000011422
PIK3R1	NA	PIK3R1	phosphoinositide-3-kinase, regulatory subunit 1 (alpha)	5295	ENSG00000145675
SKP2	NA	SKP2	S-phase kinase-associated protein 2, E3 ubiquitin protein ligase	6502	ENSG00000145604
HMGCS2	NA	HMGCS2	3-hydroxy-3-methylglutaryl-CoA synthase 2 (mitochondrial)	3158	ENSG00000134240
PRDM1	NA	PRDM1	PR domain containing 1, with ZNF domain	639	ENSG00000057657
HSPA1B	NA	HSPA1B	heat shock 70kDa protein 1B	3304	ENSG00000204388
BCL10	NA	BCL10	B-cell CLL/lymphoma 10	8915	ENSG00000142867
GPLD1	NA	GPLD1	glycosylphosphatidylinositol specific phospholipase D1	2822	ENSG00000112293
IFNA21	NA	IFNA21	interferon, alpha 21	3452	ENSG00000137080
TSC1	NA	TSC1	tuberous sclerosis 1	7248	ENSG00000165699
GNA12	NA	GNA12	guanine nucleotide binding protein (G protein) alpha 12	2768	ENSG00000146535
CASP7	NA	CASP7	caspase 7, apoptosis-related cysteine peptidase	840	ENSG00000165806
CXCR4	NA	CXCR4	chemokine (C-X-C motif) receptor 4	7852	ENSG00000121966
ELMO1	NA	ELMO1	engulfment and cell motility 1	9844	ENSG00000155849
PRDX3	NA	PRDX3	peroxiredoxin 3	10935	ENSG00000165672
NCOA4	NA	NCOA4	nuclear receptor coactivator 4	8031	ENSG00000138293
AKT3	NA	AKT3	v-akt murine thymoma viral oncogene homolog 3 (protein kinase B, gamma)	10000	ENSG00000117020
CAMK2B	NA	CAMK2B	calcium/calmodulin-dependent protein kinase II beta	816	ENSG00000058404
TADA2B	NA	TADA2B	transcriptional adaptor 2B	93624	ENSG00000173011
SVIL	NA	SVIL	supervillin	6840	ENSG00000197321
COL1A2	NA	COL1A2	collagen, type I, alpha 2	1278	ENSG00000164692
ITGAV	NA	ITGAV	integrin, alpha V	3685	ENSG00000138448
ARPC2	NA	ARPC2	actin related protein 2/3 complex, subunit 2, 34kDa	10109	ENSG00000163466
JAK3	NA	JAK3	Janus kinase 3	3718	ENSG00000105639
BTRC	NA	BTRC	beta-transducin repeat containing E3 ubiquitin protein ligase	8945	ENSG00000166167
Pathway Commons pathway	Alpha9 beta1 integrin signaling events	DB_ID:1578
C=1305;O=121;E=39.40;R=3.07;rawP=6.99e-28;adjP=1.11e-25
KDR	NA	KDR	kinase insert domain receptor (a type III receptor tyrosine kinase)	3791	ENSG00000128052
SUMO2	NA	SUMO2	SMT3 suppressor of mif two 3 homolog 2 (S. cerevisiae)	6613	ENSG00000188612
EGF	NA	EGF	epidermal growth factor	1950	ENSG00000138798
PBX1	NA	PBX1	pre-B-cell leukemia homeobox 1	5087	ENSG00000185630
COL18A1	NA	COL18A1	collagen, type XVIII, alpha 1	80781	ENSG00000182871
IL13RA1	NA	IL13RA1	interleukin 13 receptor, alpha 1	3597	ENSG00000131724
LYN	NA	LYN	v-yes-1 Yamaguchi sarcoma viral related oncogene homolog	4067	ENSG00000254087
AIFM2	NA	AIFM2	apoptosis-inducing factor, mitochondrion-associated, 2	84883	ENSG00000042286
TNC	NA	TNC	tenascin C	3371	ENSG00000041982
HSPA1A	NA	HSPA1A	heat shock 70kDa protein 1A	3303	ENSG00000204389
RPL11	NA	RPL11	ribosomal protein L11	6135	ENSG00000142676
CSDE1	NA	CSDE1	cold shock domain containing E1, RNA-binding	7812	ENSG00000009307
CCNA2	NA	CCNA2	cyclin A2	890	ENSG00000145386
ASAP2	NA	ASAP2	ArfGAP with SH3 domain, ankyrin repeat and PH domain 2	8853	ENSG00000151693
PLAU	NA	PLAU	plasminogen activator, urokinase	5328	ENSG00000122861
SHC1	NA	SHC1	SHC (Src homology 2 domain containing) transforming protein 1	6464	ENSG00000160691
UBE2D1	NA	UBE2D1	ubiquitin-conjugating enzyme E2D 1	7321	ENSG00000072401
CASP8	NA	CASP8	caspase 8, apoptosis-related cysteine peptidase	841	ENSG00000064012
SNAI2	NA	SNAI2	snail homolog 2 (Drosophila)	6591	ENSG00000019549
ITSN1	NA	ITSN1	intersectin 1 (SH3 domain protein)	6453	ENSG00000205726
SP5	NA	SP5	Sp5 transcription factor	389058	ENSG00000204335
PDGFRB	NA	PDGFRB	platelet-derived growth factor receptor, beta polypeptide	5159	ENSG00000113721
PTPRK	NA	PTPRK	protein tyrosine phosphatase, receptor type, K	5796	ENSG00000152894
USO1	NA	USO1	USO1 vesicle docking protein homolog (yeast)	8615	ENSG00000138768
GJA1	NA	GJA1	gap junction protein, alpha 1, 43kDa	2697	ENSG00000152661
RIPK2	NA	RIPK2	receptor-interacting serine-threonine kinase 2	8767	ENSG00000104312
RNF144B	NA	RNF144B	ring finger protein 144B	255488	ENSG00000137393
SAT1	NA	SAT1	spermidine/spermine N1-acetyltransferase 1	6303	ENSG00000130066
NCL	NA	NCL	nucleolin	4691	ENSG00000115053
IL10	NA	IL10	interleukin 10	3586	ENSG00000136634
SMYD2	NA	SMYD2	SET and MYND domain containing 2	56950	ENSG00000143499
SESN1	NA	SESN1	sestrin 1	27244	ENSG00000080546
MAP3K6	NA	MAP3K6	mitogen-activated protein kinase kinase kinase 6	9064	ENSG00000142733
SH3GL1	NA	SH3GL1	SH3-domain GRB2-like 1	6455	ENSG00000141985
ITGB2	NA	ITGB2	integrin, beta 2 (complement component 3 receptor 3 and 4 subunit)	3689	ENSG00000160255
PPP2CA	NA	PPP2CA	protein phosphatase 2, catalytic subunit, alpha isozyme	5515	ENSG00000113575
RBL1	NA	RBL1	retinoblastoma-like 1 (p107)	5933	ENSG00000080839
KLF4	NA	KLF4	Kruppel-like factor 4 (gut)	9314	ENSG00000136826
PTMA	NA	PTMA	prothymosin, alpha	5757	ENSG00000187514
NCK2	NA	NCK2	NCK adaptor protein 2	8440	ENSG00000071051
GSK3B	NA	GSK3B	glycogen synthase kinase 3 beta	2932	ENSG00000082701
RCAN2	NA	RCAN2	regulator of calcineurin 2	10231	ENSG00000172348
HGF	NA	HGF	hepatocyte growth factor (hepapoietin A; scatter factor)	3082	ENSG00000019991
SMAD1	NA	SMAD1	SMAD family member 1	4086	ENSG00000170365
CTDSP1	NA	CTDSP1	CTD (carboxy-terminal domain, RNA polymerase II, polypeptide A) small phosphatase 1	58190	ENSG00000144579
MAPK12	NA	MAPK12	mitogen-activated protein kinase 12	6300	ENSG00000188130
TNIK	NA	TNIK	TRAF2 and NCK interacting kinase	23043	ENSG00000154310
FN1	NA	FN1	fibronectin 1	2335	ENSG00000115414
EGR1	NA	EGR1	early growth response 1	1958	ENSG00000120738
TFF3	NA	TFF3	trefoil factor 3 (intestinal)	7033	ENSG00000160180
LNPEP	NA	LNPEP	leucyl/cystinyl aminopeptidase	4012	ENSG00000113441
CCM2	NA	CCM2	cerebral cavernous malformation 2	83605	ENSG00000136280
SDC2	NA	SDC2	syndecan 2	6383	ENSG00000169439
TGFBR1	NA	TGFBR1	transforming growth factor, beta receptor 1	7046	ENSG00000106799
ACTN2	NA	ACTN2	actinin, alpha 2	88	ENSG00000077522
ARF1	NA	ARF1	ADP-ribosylation factor 1	375	ENSG00000143761
PPP3CB	NA	PPP3CB	protein phosphatase 3, catalytic subunit, beta isozyme	5532	ENSG00000107758
MLH1	NA	MLH1	mutL homolog 1, colon cancer, nonpolyposis type 2 (E. coli)	4292	ENSG00000076242
SFXN3	NA	SFXN3	sideroflexin 3	81855	ENSG00000107819
BMP6	NA	BMP6	bone morphogenetic protein 6	654	ENSG00000153162
JMY	NA	JMY	junction mediating and regulatory protein, p53 cofactor	133746	ENSG00000152409
CFLAR	NA	CFLAR	CASP8 and FADD-like apoptosis regulator	8837	ENSG00000003402
GDI1	NA	GDI1	GDP dissociation inhibitor 1	2664	ENSG00000203879
PRKCE	NA	PRKCE	protein kinase C, epsilon	5581	ENSG00000171132
JUN	NA	JUN	jun proto-oncogene	3725	ENSG00000177606
FKBP1A	NA	FKBP1A	FK506 binding protein 1A, 12kDa	2280	ENSG00000088832
CAPN2	NA	CAPN2	calpain 2, (m/II) large subunit	824	ENSG00000162909
PTPN1	NA	PTPN1	protein tyrosine phosphatase, non-receptor type 1	5770	ENSG00000196396
VASP	NA	VASP	vasodilator-stimulated phosphoprotein	7408	ENSG00000125753
DAB2	NA	DAB2	disabled homolog 2, mitogen-responsive phosphoprotein (Drosophila)	1601	ENSG00000153071
TIMP1	NA	TIMP1	TIMP metallopeptidase inhibitor 1	7076	ENSG00000102265
GATA2	NA	GATA2	GATA binding protein 2	2624	ENSG00000179348
ARPC5	NA	ARPC5	actin related protein 2/3 complex, subunit 5, 16kDa	10092	ENSG00000162704
HUWE1	NA	HUWE1	HECT, UBA and WWE domain containing 1, E3 ubiquitin protein ligase	10075	ENSG00000086758
SETD8	NA	SETD8	SET domain containing (lysine methyltransferase) 8	387893	ENSG00000183955
CCND3	NA	CCND3	cyclin D3	896	ENSG00000112576
PRKG1	NA	PRKG1	protein kinase, cGMP-dependent, type I	5592	ENSG00000185532
BAX	NA	BAX	BCL2-associated X protein	581	ENSG00000087088
ADAM15	NA	ADAM15	ADAM metallopeptidase domain 15	8751	ENSG00000143537
DCP1A	NA	DCP1A	DCP1 decapping enzyme homolog A (S. cerevisiae)	55802	NULL
LSP1	NA	LSP1	lymphocyte-specific protein 1	4046	ENSG00000130592
WWP1	NA	WWP1	WW domain containing E3 ubiquitin protein ligase 1	11059	ENSG00000123124
CXCL12	NA	CXCL12	chemokine (C-X-C motif) ligand 12	6387	ENSG00000107562
GNAI2	NA	GNAI2	guanine nucleotide binding protein (G protein), alpha inhibiting activity polypeptide 2	2771	ENSG00000114353
NCOA2	NA	NCOA2	nuclear receptor coactivator 2	10499	ENSG00000140396
KDELR1	NA	KDELR1	KDEL (Lys-Asp-Glu-Leu) endoplasmic reticulum protein retention receptor 1	10945	ENSG00000105438
TGFB1	NA	TGFB1	transforming growth factor, beta 1	7040	ENSG00000105329
HES1	NA	HES1	hairy and enhancer of split 1, (Drosophila)	3280	ENSG00000114315
IL17RD	NA	IL17RD	interleukin 17 receptor D	54756	ENSG00000144730
CDC25A	NA	CDC25A	cell division cycle 25 homolog A (S. pombe)	993	ENSG00000164045
PPP3CA	NA	PPP3CA	protein phosphatase 3, catalytic subunit, alpha isozyme	5530	ENSG00000138814
FOXO4	NA	FOXO4	forkhead box O4	4303	ENSG00000184481
LAMC1	NA	LAMC1	laminin, gamma 1 (formerly LAMB2)	3915	ENSG00000135862
TNFAIP3	NA	TNFAIP3	tumor necrosis factor, alpha-induced protein 3	7128	ENSG00000118503
RBBP7	NA	RBBP7	retinoblastoma binding protein 7	5931	ENSG00000102054
RB1CC1	NA	RB1CC1	RB1-inducible coiled-coil 1	9821	ENSG00000023287
PLAUR	NA	PLAUR	plasminogen activator, urokinase receptor	5329	ENSG00000011422
PIK3R1	NA	PIK3R1	phosphoinositide-3-kinase, regulatory subunit 1 (alpha)	5295	ENSG00000145675
SKP2	NA	SKP2	S-phase kinase-associated protein 2, E3 ubiquitin protein ligase	6502	ENSG00000145604
HMGCS2	NA	HMGCS2	3-hydroxy-3-methylglutaryl-CoA synthase 2 (mitochondrial)	3158	ENSG00000134240
ADAM12	NA	ADAM12	ADAM metallopeptidase domain 12	8038	ENSG00000148848
PRDM1	NA	PRDM1	PR domain containing 1, with ZNF domain	639	ENSG00000057657
HSPA1B	NA	HSPA1B	heat shock 70kDa protein 1B	3304	ENSG00000204388
BCL10	NA	BCL10	B-cell CLL/lymphoma 10	8915	ENSG00000142867
GPLD1	NA	GPLD1	glycosylphosphatidylinositol specific phospholipase D1	2822	ENSG00000112293
IFNA21	NA	IFNA21	interferon, alpha 21	3452	ENSG00000137080
TSC1	NA	TSC1	tuberous sclerosis 1	7248	ENSG00000165699
GNA12	NA	GNA12	guanine nucleotide binding protein (G protein) alpha 12	2768	ENSG00000146535
CXCR4	NA	CXCR4	chemokine (C-X-C motif) receptor 4	7852	ENSG00000121966
ELMO1	NA	ELMO1	engulfment and cell motility 1	9844	ENSG00000155849
PRDX3	NA	PRDX3	peroxiredoxin 3	10935	ENSG00000165672
NCOA4	NA	NCOA4	nuclear receptor coactivator 4	8031	ENSG00000138293
AKT3	NA	AKT3	v-akt murine thymoma viral oncogene homolog 3 (protein kinase B, gamma)	10000	ENSG00000117020
CAMK2B	NA	CAMK2B	calcium/calmodulin-dependent protein kinase II beta	816	ENSG00000058404
TADA2B	NA	TADA2B	transcriptional adaptor 2B	93624	ENSG00000173011
SVIL	NA	SVIL	supervillin	6840	ENSG00000197321
COL1A2	NA	COL1A2	collagen, type I, alpha 2	1278	ENSG00000164692
ITGAV	NA	ITGAV	integrin, alpha V	3685	ENSG00000138448
ARPC2	NA	ARPC2	actin related protein 2/3 complex, subunit 2, 34kDa	10109	ENSG00000163466
JAK3	NA	JAK3	Janus kinase 3	3718	ENSG00000105639
BTRC	NA	BTRC	beta-transducin repeat containing E3 ubiquitin protein ligase	8945	ENSG00000166167
Pathway Commons pathway	IL3-mediated signaling events	DB_ID:1564
C=1295;O=119;E=39.10;R=3.04;rawP=4.37e-27;adjP=4.33e-25
KDR	NA	KDR	kinase insert domain receptor (a type III receptor tyrosine kinase)	3791	ENSG00000128052
SUMO2	NA	SUMO2	SMT3 suppressor of mif two 3 homolog 2 (S. cerevisiae)	6613	ENSG00000188612
EGF	NA	EGF	epidermal growth factor	1950	ENSG00000138798
PBX1	NA	PBX1	pre-B-cell leukemia homeobox 1	5087	ENSG00000185630
COL18A1	NA	COL18A1	collagen, type XVIII, alpha 1	80781	ENSG00000182871
IL13RA1	NA	IL13RA1	interleukin 13 receptor, alpha 1	3597	ENSG00000131724
LYN	NA	LYN	v-yes-1 Yamaguchi sarcoma viral related oncogene homolog	4067	ENSG00000254087
AIFM2	NA	AIFM2	apoptosis-inducing factor, mitochondrion-associated, 2	84883	ENSG00000042286
HSPA1A	NA	HSPA1A	heat shock 70kDa protein 1A	3303	ENSG00000204389
RPL11	NA	RPL11	ribosomal protein L11	6135	ENSG00000142676
CSDE1	NA	CSDE1	cold shock domain containing E1, RNA-binding	7812	ENSG00000009307
CCNA2	NA	CCNA2	cyclin A2	890	ENSG00000145386
ASAP2	NA	ASAP2	ArfGAP with SH3 domain, ankyrin repeat and PH domain 2	8853	ENSG00000151693
PLAU	NA	PLAU	plasminogen activator, urokinase	5328	ENSG00000122861
SHC1	NA	SHC1	SHC (Src homology 2 domain containing) transforming protein 1	6464	ENSG00000160691
UBE2D1	NA	UBE2D1	ubiquitin-conjugating enzyme E2D 1	7321	ENSG00000072401
CASP8	NA	CASP8	caspase 8, apoptosis-related cysteine peptidase	841	ENSG00000064012
SNAI2	NA	SNAI2	snail homolog 2 (Drosophila)	6591	ENSG00000019549
ITSN1	NA	ITSN1	intersectin 1 (SH3 domain protein)	6453	ENSG00000205726
SP5	NA	SP5	Sp5 transcription factor	389058	ENSG00000204335
PDGFRB	NA	PDGFRB	platelet-derived growth factor receptor, beta polypeptide	5159	ENSG00000113721
PTPRK	NA	PTPRK	protein tyrosine phosphatase, receptor type, K	5796	ENSG00000152894
USO1	NA	USO1	USO1 vesicle docking protein homolog (yeast)	8615	ENSG00000138768
GJA1	NA	GJA1	gap junction protein, alpha 1, 43kDa	2697	ENSG00000152661
RIPK2	NA	RIPK2	receptor-interacting serine-threonine kinase 2	8767	ENSG00000104312
RNF144B	NA	RNF144B	ring finger protein 144B	255488	ENSG00000137393
NCL	NA	NCL	nucleolin	4691	ENSG00000115053
IL10	NA	IL10	interleukin 10	3586	ENSG00000136634
SMYD2	NA	SMYD2	SET and MYND domain containing 2	56950	ENSG00000143499
SESN1	NA	SESN1	sestrin 1	27244	ENSG00000080546
MAP3K6	NA	MAP3K6	mitogen-activated protein kinase kinase kinase 6	9064	ENSG00000142733
IL3RA	NA	IL3RA	interleukin 3 receptor, alpha (low affinity)	3563	ENSG00000185291
SH3GL1	NA	SH3GL1	SH3-domain GRB2-like 1	6455	ENSG00000141985
ITGB2	NA	ITGB2	integrin, beta 2 (complement component 3 receptor 3 and 4 subunit)	3689	ENSG00000160255
PPP2CA	NA	PPP2CA	protein phosphatase 2, catalytic subunit, alpha isozyme	5515	ENSG00000113575
RBL1	NA	RBL1	retinoblastoma-like 1 (p107)	5933	ENSG00000080839
KLF4	NA	KLF4	Kruppel-like factor 4 (gut)	9314	ENSG00000136826
PTMA	NA	PTMA	prothymosin, alpha	5757	ENSG00000187514
NCK2	NA	NCK2	NCK adaptor protein 2	8440	ENSG00000071051
GSK3B	NA	GSK3B	glycogen synthase kinase 3 beta	2932	ENSG00000082701
RCAN2	NA	RCAN2	regulator of calcineurin 2	10231	ENSG00000172348
HGF	NA	HGF	hepatocyte growth factor (hepapoietin A; scatter factor)	3082	ENSG00000019991
SMAD1	NA	SMAD1	SMAD family member 1	4086	ENSG00000170365
CTDSP1	NA	CTDSP1	CTD (carboxy-terminal domain, RNA polymerase II, polypeptide A) small phosphatase 1	58190	ENSG00000144579
MAPK12	NA	MAPK12	mitogen-activated protein kinase 12	6300	ENSG00000188130
TNIK	NA	TNIK	TRAF2 and NCK interacting kinase	23043	ENSG00000154310
FN1	NA	FN1	fibronectin 1	2335	ENSG00000115414
EGR1	NA	EGR1	early growth response 1	1958	ENSG00000120738
TFF3	NA	TFF3	trefoil factor 3 (intestinal)	7033	ENSG00000160180
LNPEP	NA	LNPEP	leucyl/cystinyl aminopeptidase	4012	ENSG00000113441
CCM2	NA	CCM2	cerebral cavernous malformation 2	83605	ENSG00000136280
SDC2	NA	SDC2	syndecan 2	6383	ENSG00000169439
TGFBR1	NA	TGFBR1	transforming growth factor, beta receptor 1	7046	ENSG00000106799
ACTN2	NA	ACTN2	actinin, alpha 2	88	ENSG00000077522
ARF1	NA	ARF1	ADP-ribosylation factor 1	375	ENSG00000143761
PPP3CB	NA	PPP3CB	protein phosphatase 3, catalytic subunit, beta isozyme	5532	ENSG00000107758
MLH1	NA	MLH1	mutL homolog 1, colon cancer, nonpolyposis type 2 (E. coli)	4292	ENSG00000076242
SFXN3	NA	SFXN3	sideroflexin 3	81855	ENSG00000107819
BMP6	NA	BMP6	bone morphogenetic protein 6	654	ENSG00000153162
JMY	NA	JMY	junction mediating and regulatory protein, p53 cofactor	133746	ENSG00000152409
CFLAR	NA	CFLAR	CASP8 and FADD-like apoptosis regulator	8837	ENSG00000003402
GDI1	NA	GDI1	GDP dissociation inhibitor 1	2664	ENSG00000203879
PRKCE	NA	PRKCE	protein kinase C, epsilon	5581	ENSG00000171132
JUN	NA	JUN	jun proto-oncogene	3725	ENSG00000177606
FKBP1A	NA	FKBP1A	FK506 binding protein 1A, 12kDa	2280	ENSG00000088832
CAPN2	NA	CAPN2	calpain 2, (m/II) large subunit	824	ENSG00000162909
PTPN1	NA	PTPN1	protein tyrosine phosphatase, non-receptor type 1	5770	ENSG00000196396
VASP	NA	VASP	vasodilator-stimulated phosphoprotein	7408	ENSG00000125753
DAB2	NA	DAB2	disabled homolog 2, mitogen-responsive phosphoprotein (Drosophila)	1601	ENSG00000153071
TIMP1	NA	TIMP1	TIMP metallopeptidase inhibitor 1	7076	ENSG00000102265
GATA2	NA	GATA2	GATA binding protein 2	2624	ENSG00000179348
ARPC5	NA	ARPC5	actin related protein 2/3 complex, subunit 5, 16kDa	10092	ENSG00000162704
HUWE1	NA	HUWE1	HECT, UBA and WWE domain containing 1, E3 ubiquitin protein ligase	10075	ENSG00000086758
SETD8	NA	SETD8	SET domain containing (lysine methyltransferase) 8	387893	ENSG00000183955
CCND3	NA	CCND3	cyclin D3	896	ENSG00000112576
PRKG1	NA	PRKG1	protein kinase, cGMP-dependent, type I	5592	ENSG00000185532
BAX	NA	BAX	BCL2-associated X protein	581	ENSG00000087088
DCP1A	NA	DCP1A	DCP1 decapping enzyme homolog A (S. cerevisiae)	55802	NULL
LSP1	NA	LSP1	lymphocyte-specific protein 1	4046	ENSG00000130592
WWP1	NA	WWP1	WW domain containing E3 ubiquitin protein ligase 1	11059	ENSG00000123124
CXCL12	NA	CXCL12	chemokine (C-X-C motif) ligand 12	6387	ENSG00000107562
GNAI2	NA	GNAI2	guanine nucleotide binding protein (G protein), alpha inhibiting activity polypeptide 2	2771	ENSG00000114353
NCOA2	NA	NCOA2	nuclear receptor coactivator 2	10499	ENSG00000140396
KDELR1	NA	KDELR1	KDEL (Lys-Asp-Glu-Leu) endoplasmic reticulum protein retention receptor 1	10945	ENSG00000105438
TGFB1	NA	TGFB1	transforming growth factor, beta 1	7040	ENSG00000105329
HES1	NA	HES1	hairy and enhancer of split 1, (Drosophila)	3280	ENSG00000114315
IL17RD	NA	IL17RD	interleukin 17 receptor D	54756	ENSG00000144730
CDC25A	NA	CDC25A	cell division cycle 25 homolog A (S. pombe)	993	ENSG00000164045
PPP3CA	NA	PPP3CA	protein phosphatase 3, catalytic subunit, alpha isozyme	5530	ENSG00000138814
FOXO4	NA	FOXO4	forkhead box O4	4303	ENSG00000184481
LAMC1	NA	LAMC1	laminin, gamma 1 (formerly LAMB2)	3915	ENSG00000135862
TNFAIP3	NA	TNFAIP3	tumor necrosis factor, alpha-induced protein 3	7128	ENSG00000118503
RBBP7	NA	RBBP7	retinoblastoma binding protein 7	5931	ENSG00000102054
RB1CC1	NA	RB1CC1	RB1-inducible coiled-coil 1	9821	ENSG00000023287
PLAUR	NA	PLAUR	plasminogen activator, urokinase receptor	5329	ENSG00000011422
PIK3R1	NA	PIK3R1	phosphoinositide-3-kinase, regulatory subunit 1 (alpha)	5295	ENSG00000145675
SKP2	NA	SKP2	S-phase kinase-associated protein 2, E3 ubiquitin protein ligase	6502	ENSG00000145604
HMGCS2	NA	HMGCS2	3-hydroxy-3-methylglutaryl-CoA synthase 2 (mitochondrial)	3158	ENSG00000134240
PRDM1	NA	PRDM1	PR domain containing 1, with ZNF domain	639	ENSG00000057657
HSPA1B	NA	HSPA1B	heat shock 70kDa protein 1B	3304	ENSG00000204388
BCL10	NA	BCL10	B-cell CLL/lymphoma 10	8915	ENSG00000142867
GPLD1	NA	GPLD1	glycosylphosphatidylinositol specific phospholipase D1	2822	ENSG00000112293
SRP9	NA	SRP9	signal recognition particle 9kDa	6726	ENSG00000143742
IFNA21	NA	IFNA21	interferon, alpha 21	3452	ENSG00000137080
TSC1	NA	TSC1	tuberous sclerosis 1	7248	ENSG00000165699
GNA12	NA	GNA12	guanine nucleotide binding protein (G protein) alpha 12	2768	ENSG00000146535
CXCR4	NA	CXCR4	chemokine (C-X-C motif) receptor 4	7852	ENSG00000121966
ELMO1	NA	ELMO1	engulfment and cell motility 1	9844	ENSG00000155849
PRDX3	NA	PRDX3	peroxiredoxin 3	10935	ENSG00000165672
NCOA4	NA	NCOA4	nuclear receptor coactivator 4	8031	ENSG00000138293
AKT3	NA	AKT3	v-akt murine thymoma viral oncogene homolog 3 (protein kinase B, gamma)	10000	ENSG00000117020
CAMK2B	NA	CAMK2B	calcium/calmodulin-dependent protein kinase II beta	816	ENSG00000058404
TADA2B	NA	TADA2B	transcriptional adaptor 2B	93624	ENSG00000173011
SVIL	NA	SVIL	supervillin	6840	ENSG00000197321
COL1A2	NA	COL1A2	collagen, type I, alpha 2	1278	ENSG00000164692
ITGAV	NA	ITGAV	integrin, alpha V	3685	ENSG00000138448
ARPC2	NA	ARPC2	actin related protein 2/3 complex, subunit 2, 34kDa	10109	ENSG00000163466
JAK3	NA	JAK3	Janus kinase 3	3718	ENSG00000105639
BTRC	NA	BTRC	beta-transducin repeat containing E3 ubiquitin protein ligase	8945	ENSG00000166167
Pathway Commons pathway	Thrombin/protease-activated receptor (PAR) pathway	DB_ID:1552
C=1300;O=119;E=39.25;R=3.03;rawP=6.14e-27;adjP=4.73e-25
KDR	NA	KDR	kinase insert domain receptor (a type III receptor tyrosine kinase)	3791	ENSG00000128052
SUMO2	NA	SUMO2	SMT3 suppressor of mif two 3 homolog 2 (S. cerevisiae)	6613	ENSG00000188612
EGF	NA	EGF	epidermal growth factor	1950	ENSG00000138798
PBX1	NA	PBX1	pre-B-cell leukemia homeobox 1	5087	ENSG00000185630
COL18A1	NA	COL18A1	collagen, type XVIII, alpha 1	80781	ENSG00000182871
GNB1	NA	GNB1	guanine nucleotide binding protein (G protein), beta polypeptide 1	2782	ENSG00000078369
IL13RA1	NA	IL13RA1	interleukin 13 receptor, alpha 1	3597	ENSG00000131724
LYN	NA	LYN	v-yes-1 Yamaguchi sarcoma viral related oncogene homolog	4067	ENSG00000254087
AIFM2	NA	AIFM2	apoptosis-inducing factor, mitochondrion-associated, 2	84883	ENSG00000042286
HSPA1A	NA	HSPA1A	heat shock 70kDa protein 1A	3303	ENSG00000204389
RPL11	NA	RPL11	ribosomal protein L11	6135	ENSG00000142676
CSDE1	NA	CSDE1	cold shock domain containing E1, RNA-binding	7812	ENSG00000009307
CCNA2	NA	CCNA2	cyclin A2	890	ENSG00000145386
ASAP2	NA	ASAP2	ArfGAP with SH3 domain, ankyrin repeat and PH domain 2	8853	ENSG00000151693
PLAU	NA	PLAU	plasminogen activator, urokinase	5328	ENSG00000122861
SHC1	NA	SHC1	SHC (Src homology 2 domain containing) transforming protein 1	6464	ENSG00000160691
UBE2D1	NA	UBE2D1	ubiquitin-conjugating enzyme E2D 1	7321	ENSG00000072401
CASP8	NA	CASP8	caspase 8, apoptosis-related cysteine peptidase	841	ENSG00000064012
F2R	NA	F2R	coagulation factor II (thrombin) receptor	2149	ENSG00000181104
SNAI2	NA	SNAI2	snail homolog 2 (Drosophila)	6591	ENSG00000019549
ITSN1	NA	ITSN1	intersectin 1 (SH3 domain protein)	6453	ENSG00000205726
SP5	NA	SP5	Sp5 transcription factor	389058	ENSG00000204335
PDGFRB	NA	PDGFRB	platelet-derived growth factor receptor, beta polypeptide	5159	ENSG00000113721
PTPRK	NA	PTPRK	protein tyrosine phosphatase, receptor type, K	5796	ENSG00000152894
USO1	NA	USO1	USO1 vesicle docking protein homolog (yeast)	8615	ENSG00000138768
GJA1	NA	GJA1	gap junction protein, alpha 1, 43kDa	2697	ENSG00000152661
RIPK2	NA	RIPK2	receptor-interacting serine-threonine kinase 2	8767	ENSG00000104312
RNF144B	NA	RNF144B	ring finger protein 144B	255488	ENSG00000137393
NCL	NA	NCL	nucleolin	4691	ENSG00000115053
IL10	NA	IL10	interleukin 10	3586	ENSG00000136634
SMYD2	NA	SMYD2	SET and MYND domain containing 2	56950	ENSG00000143499
SESN1	NA	SESN1	sestrin 1	27244	ENSG00000080546
MAP3K6	NA	MAP3K6	mitogen-activated protein kinase kinase kinase 6	9064	ENSG00000142733
SH3GL1	NA	SH3GL1	SH3-domain GRB2-like 1	6455	ENSG00000141985
ITGB2	NA	ITGB2	integrin, beta 2 (complement component 3 receptor 3 and 4 subunit)	3689	ENSG00000160255
PPP2CA	NA	PPP2CA	protein phosphatase 2, catalytic subunit, alpha isozyme	5515	ENSG00000113575
RBL1	NA	RBL1	retinoblastoma-like 1 (p107)	5933	ENSG00000080839
KLF4	NA	KLF4	Kruppel-like factor 4 (gut)	9314	ENSG00000136826
PTMA	NA	PTMA	prothymosin, alpha	5757	ENSG00000187514
NCK2	NA	NCK2	NCK adaptor protein 2	8440	ENSG00000071051
GSK3B	NA	GSK3B	glycogen synthase kinase 3 beta	2932	ENSG00000082701
RCAN2	NA	RCAN2	regulator of calcineurin 2	10231	ENSG00000172348
HGF	NA	HGF	hepatocyte growth factor (hepapoietin A; scatter factor)	3082	ENSG00000019991
SMAD1	NA	SMAD1	SMAD family member 1	4086	ENSG00000170365
CTDSP1	NA	CTDSP1	CTD (carboxy-terminal domain, RNA polymerase II, polypeptide A) small phosphatase 1	58190	ENSG00000144579
MAPK12	NA	MAPK12	mitogen-activated protein kinase 12	6300	ENSG00000188130
TNIK	NA	TNIK	TRAF2 and NCK interacting kinase	23043	ENSG00000154310
FN1	NA	FN1	fibronectin 1	2335	ENSG00000115414
EGR1	NA	EGR1	early growth response 1	1958	ENSG00000120738
TFF3	NA	TFF3	trefoil factor 3 (intestinal)	7033	ENSG00000160180
LNPEP	NA	LNPEP	leucyl/cystinyl aminopeptidase	4012	ENSG00000113441
CCM2	NA	CCM2	cerebral cavernous malformation 2	83605	ENSG00000136280
SDC2	NA	SDC2	syndecan 2	6383	ENSG00000169439
TGFBR1	NA	TGFBR1	transforming growth factor, beta receptor 1	7046	ENSG00000106799
ACTN2	NA	ACTN2	actinin, alpha 2	88	ENSG00000077522
ARF1	NA	ARF1	ADP-ribosylation factor 1	375	ENSG00000143761
PPP3CB	NA	PPP3CB	protein phosphatase 3, catalytic subunit, beta isozyme	5532	ENSG00000107758
MLH1	NA	MLH1	mutL homolog 1, colon cancer, nonpolyposis type 2 (E. coli)	4292	ENSG00000076242
SFXN3	NA	SFXN3	sideroflexin 3	81855	ENSG00000107819
BMP6	NA	BMP6	bone morphogenetic protein 6	654	ENSG00000153162
JMY	NA	JMY	junction mediating and regulatory protein, p53 cofactor	133746	ENSG00000152409
CFLAR	NA	CFLAR	CASP8 and FADD-like apoptosis regulator	8837	ENSG00000003402
GDI1	NA	GDI1	GDP dissociation inhibitor 1	2664	ENSG00000203879
PRKCE	NA	PRKCE	protein kinase C, epsilon	5581	ENSG00000171132
JUN	NA	JUN	jun proto-oncogene	3725	ENSG00000177606
FKBP1A	NA	FKBP1A	FK506 binding protein 1A, 12kDa	2280	ENSG00000088832
CAPN2	NA	CAPN2	calpain 2, (m/II) large subunit	824	ENSG00000162909
PTPN1	NA	PTPN1	protein tyrosine phosphatase, non-receptor type 1	5770	ENSG00000196396
VASP	NA	VASP	vasodilator-stimulated phosphoprotein	7408	ENSG00000125753
DAB2	NA	DAB2	disabled homolog 2, mitogen-responsive phosphoprotein (Drosophila)	1601	ENSG00000153071
TIMP1	NA	TIMP1	TIMP metallopeptidase inhibitor 1	7076	ENSG00000102265
GATA2	NA	GATA2	GATA binding protein 2	2624	ENSG00000179348
ARPC5	NA	ARPC5	actin related protein 2/3 complex, subunit 5, 16kDa	10092	ENSG00000162704
HUWE1	NA	HUWE1	HECT, UBA and WWE domain containing 1, E3 ubiquitin protein ligase	10075	ENSG00000086758
SETD8	NA	SETD8	SET domain containing (lysine methyltransferase) 8	387893	ENSG00000183955
CCND3	NA	CCND3	cyclin D3	896	ENSG00000112576
PRKG1	NA	PRKG1	protein kinase, cGMP-dependent, type I	5592	ENSG00000185532
BAX	NA	BAX	BCL2-associated X protein	581	ENSG00000087088
DCP1A	NA	DCP1A	DCP1 decapping enzyme homolog A (S. cerevisiae)	55802	NULL
LSP1	NA	LSP1	lymphocyte-specific protein 1	4046	ENSG00000130592
WWP1	NA	WWP1	WW domain containing E3 ubiquitin protein ligase 1	11059	ENSG00000123124
CXCL12	NA	CXCL12	chemokine (C-X-C motif) ligand 12	6387	ENSG00000107562
GNAI2	NA	GNAI2	guanine nucleotide binding protein (G protein), alpha inhibiting activity polypeptide 2	2771	ENSG00000114353
NCOA2	NA	NCOA2	nuclear receptor coactivator 2	10499	ENSG00000140396
KDELR1	NA	KDELR1	KDEL (Lys-Asp-Glu-Leu) endoplasmic reticulum protein retention receptor 1	10945	ENSG00000105438
TGFB1	NA	TGFB1	transforming growth factor, beta 1	7040	ENSG00000105329
HES1	NA	HES1	hairy and enhancer of split 1, (Drosophila)	3280	ENSG00000114315
IL17RD	NA	IL17RD	interleukin 17 receptor D	54756	ENSG00000144730
CDC25A	NA	CDC25A	cell division cycle 25 homolog A (S. pombe)	993	ENSG00000164045
PPP3CA	NA	PPP3CA	protein phosphatase 3, catalytic subunit, alpha isozyme	5530	ENSG00000138814
FOXO4	NA	FOXO4	forkhead box O4	4303	ENSG00000184481
LAMC1	NA	LAMC1	laminin, gamma 1 (formerly LAMB2)	3915	ENSG00000135862
TNFAIP3	NA	TNFAIP3	tumor necrosis factor, alpha-induced protein 3	7128	ENSG00000118503
RBBP7	NA	RBBP7	retinoblastoma binding protein 7	5931	ENSG00000102054
RB1CC1	NA	RB1CC1	RB1-inducible coiled-coil 1	9821	ENSG00000023287
PLAUR	NA	PLAUR	plasminogen activator, urokinase receptor	5329	ENSG00000011422
PIK3R1	NA	PIK3R1	phosphoinositide-3-kinase, regulatory subunit 1 (alpha)	5295	ENSG00000145675
SKP2	NA	SKP2	S-phase kinase-associated protein 2, E3 ubiquitin protein ligase	6502	ENSG00000145604
HMGCS2	NA	HMGCS2	3-hydroxy-3-methylglutaryl-CoA synthase 2 (mitochondrial)	3158	ENSG00000134240
PRDM1	NA	PRDM1	PR domain containing 1, with ZNF domain	639	ENSG00000057657
HSPA1B	NA	HSPA1B	heat shock 70kDa protein 1B	3304	ENSG00000204388
BCL10	NA	BCL10	B-cell CLL/lymphoma 10	8915	ENSG00000142867
GPLD1	NA	GPLD1	glycosylphosphatidylinositol specific phospholipase D1	2822	ENSG00000112293
IFNA21	NA	IFNA21	interferon, alpha 21	3452	ENSG00000137080
TSC1	NA	TSC1	tuberous sclerosis 1	7248	ENSG00000165699
GNA12	NA	GNA12	guanine nucleotide binding protein (G protein) alpha 12	2768	ENSG00000146535
CXCR4	NA	CXCR4	chemokine (C-X-C motif) receptor 4	7852	ENSG00000121966
ELMO1	NA	ELMO1	engulfment and cell motility 1	9844	ENSG00000155849
PRDX3	NA	PRDX3	peroxiredoxin 3	10935	ENSG00000165672
NCOA4	NA	NCOA4	nuclear receptor coactivator 4	8031	ENSG00000138293
AKT3	NA	AKT3	v-akt murine thymoma viral oncogene homolog 3 (protein kinase B, gamma)	10000	ENSG00000117020
CAMK2B	NA	CAMK2B	calcium/calmodulin-dependent protein kinase II beta	816	ENSG00000058404
TADA2B	NA	TADA2B	transcriptional adaptor 2B	93624	ENSG00000173011
SVIL	NA	SVIL	supervillin	6840	ENSG00000197321
COL1A2	NA	COL1A2	collagen, type I, alpha 2	1278	ENSG00000164692
ITGAV	NA	ITGAV	integrin, alpha V	3685	ENSG00000138448
ARPC2	NA	ARPC2	actin related protein 2/3 complex, subunit 2, 34kDa	10109	ENSG00000163466
JAK3	NA	JAK3	Janus kinase 3	3718	ENSG00000105639
BTRC	NA	BTRC	beta-transducin repeat containing E3 ubiquitin protein ligase	8945	ENSG00000166167
Pathway Commons pathway	PAR1-mediated thrombin signaling events	DB_ID:1531
C=1299;O=119;E=39.22;R=3.03;rawP=5.74e-27;adjP=4.73e-25
KDR	NA	KDR	kinase insert domain receptor (a type III receptor tyrosine kinase)	3791	ENSG00000128052
SUMO2	NA	SUMO2	SMT3 suppressor of mif two 3 homolog 2 (S. cerevisiae)	6613	ENSG00000188612
EGF	NA	EGF	epidermal growth factor	1950	ENSG00000138798
PBX1	NA	PBX1	pre-B-cell leukemia homeobox 1	5087	ENSG00000185630
COL18A1	NA	COL18A1	collagen, type XVIII, alpha 1	80781	ENSG00000182871
GNB1	NA	GNB1	guanine nucleotide binding protein (G protein), beta polypeptide 1	2782	ENSG00000078369
IL13RA1	NA	IL13RA1	interleukin 13 receptor, alpha 1	3597	ENSG00000131724
LYN	NA	LYN	v-yes-1 Yamaguchi sarcoma viral related oncogene homolog	4067	ENSG00000254087
AIFM2	NA	AIFM2	apoptosis-inducing factor, mitochondrion-associated, 2	84883	ENSG00000042286
HSPA1A	NA	HSPA1A	heat shock 70kDa protein 1A	3303	ENSG00000204389
RPL11	NA	RPL11	ribosomal protein L11	6135	ENSG00000142676
CSDE1	NA	CSDE1	cold shock domain containing E1, RNA-binding	7812	ENSG00000009307
CCNA2	NA	CCNA2	cyclin A2	890	ENSG00000145386
ASAP2	NA	ASAP2	ArfGAP with SH3 domain, ankyrin repeat and PH domain 2	8853	ENSG00000151693
PLAU	NA	PLAU	plasminogen activator, urokinase	5328	ENSG00000122861
SHC1	NA	SHC1	SHC (Src homology 2 domain containing) transforming protein 1	6464	ENSG00000160691
UBE2D1	NA	UBE2D1	ubiquitin-conjugating enzyme E2D 1	7321	ENSG00000072401
CASP8	NA	CASP8	caspase 8, apoptosis-related cysteine peptidase	841	ENSG00000064012
F2R	NA	F2R	coagulation factor II (thrombin) receptor	2149	ENSG00000181104
SNAI2	NA	SNAI2	snail homolog 2 (Drosophila)	6591	ENSG00000019549
ITSN1	NA	ITSN1	intersectin 1 (SH3 domain protein)	6453	ENSG00000205726
SP5	NA	SP5	Sp5 transcription factor	389058	ENSG00000204335
PDGFRB	NA	PDGFRB	platelet-derived growth factor receptor, beta polypeptide	5159	ENSG00000113721
PTPRK	NA	PTPRK	protein tyrosine phosphatase, receptor type, K	5796	ENSG00000152894
USO1	NA	USO1	USO1 vesicle docking protein homolog (yeast)	8615	ENSG00000138768
GJA1	NA	GJA1	gap junction protein, alpha 1, 43kDa	2697	ENSG00000152661
RIPK2	NA	RIPK2	receptor-interacting serine-threonine kinase 2	8767	ENSG00000104312
RNF144B	NA	RNF144B	ring finger protein 144B	255488	ENSG00000137393
NCL	NA	NCL	nucleolin	4691	ENSG00000115053
IL10	NA	IL10	interleukin 10	3586	ENSG00000136634
SMYD2	NA	SMYD2	SET and MYND domain containing 2	56950	ENSG00000143499
SESN1	NA	SESN1	sestrin 1	27244	ENSG00000080546
MAP3K6	NA	MAP3K6	mitogen-activated protein kinase kinase kinase 6	9064	ENSG00000142733
SH3GL1	NA	SH3GL1	SH3-domain GRB2-like 1	6455	ENSG00000141985
ITGB2	NA	ITGB2	integrin, beta 2 (complement component 3 receptor 3 and 4 subunit)	3689	ENSG00000160255
PPP2CA	NA	PPP2CA	protein phosphatase 2, catalytic subunit, alpha isozyme	5515	ENSG00000113575
RBL1	NA	RBL1	retinoblastoma-like 1 (p107)	5933	ENSG00000080839
KLF4	NA	KLF4	Kruppel-like factor 4 (gut)	9314	ENSG00000136826
PTMA	NA	PTMA	prothymosin, alpha	5757	ENSG00000187514
NCK2	NA	NCK2	NCK adaptor protein 2	8440	ENSG00000071051
GSK3B	NA	GSK3B	glycogen synthase kinase 3 beta	2932	ENSG00000082701
RCAN2	NA	RCAN2	regulator of calcineurin 2	10231	ENSG00000172348
HGF	NA	HGF	hepatocyte growth factor (hepapoietin A; scatter factor)	3082	ENSG00000019991
SMAD1	NA	SMAD1	SMAD family member 1	4086	ENSG00000170365
CTDSP1	NA	CTDSP1	CTD (carboxy-terminal domain, RNA polymerase II, polypeptide A) small phosphatase 1	58190	ENSG00000144579
MAPK12	NA	MAPK12	mitogen-activated protein kinase 12	6300	ENSG00000188130
TNIK	NA	TNIK	TRAF2 and NCK interacting kinase	23043	ENSG00000154310
FN1	NA	FN1	fibronectin 1	2335	ENSG00000115414
EGR1	NA	EGR1	early growth response 1	1958	ENSG00000120738
TFF3	NA	TFF3	trefoil factor 3 (intestinal)	7033	ENSG00000160180
LNPEP	NA	LNPEP	leucyl/cystinyl aminopeptidase	4012	ENSG00000113441
CCM2	NA	CCM2	cerebral cavernous malformation 2	83605	ENSG00000136280
SDC2	NA	SDC2	syndecan 2	6383	ENSG00000169439
TGFBR1	NA	TGFBR1	transforming growth factor, beta receptor 1	7046	ENSG00000106799
ACTN2	NA	ACTN2	actinin, alpha 2	88	ENSG00000077522
ARF1	NA	ARF1	ADP-ribosylation factor 1	375	ENSG00000143761
PPP3CB	NA	PPP3CB	protein phosphatase 3, catalytic subunit, beta isozyme	5532	ENSG00000107758
MLH1	NA	MLH1	mutL homolog 1, colon cancer, nonpolyposis type 2 (E. coli)	4292	ENSG00000076242
SFXN3	NA	SFXN3	sideroflexin 3	81855	ENSG00000107819
BMP6	NA	BMP6	bone morphogenetic protein 6	654	ENSG00000153162
JMY	NA	JMY	junction mediating and regulatory protein, p53 cofactor	133746	ENSG00000152409
CFLAR	NA	CFLAR	CASP8 and FADD-like apoptosis regulator	8837	ENSG00000003402
GDI1	NA	GDI1	GDP dissociation inhibitor 1	2664	ENSG00000203879
PRKCE	NA	PRKCE	protein kinase C, epsilon	5581	ENSG00000171132
JUN	NA	JUN	jun proto-oncogene	3725	ENSG00000177606
FKBP1A	NA	FKBP1A	FK506 binding protein 1A, 12kDa	2280	ENSG00000088832
CAPN2	NA	CAPN2	calpain 2, (m/II) large subunit	824	ENSG00000162909
PTPN1	NA	PTPN1	protein tyrosine phosphatase, non-receptor type 1	5770	ENSG00000196396
VASP	NA	VASP	vasodilator-stimulated phosphoprotein	7408	ENSG00000125753
DAB2	NA	DAB2	disabled homolog 2, mitogen-responsive phosphoprotein (Drosophila)	1601	ENSG00000153071
TIMP1	NA	TIMP1	TIMP metallopeptidase inhibitor 1	7076	ENSG00000102265
GATA2	NA	GATA2	GATA binding protein 2	2624	ENSG00000179348
ARPC5	NA	ARPC5	actin related protein 2/3 complex, subunit 5, 16kDa	10092	ENSG00000162704
HUWE1	NA	HUWE1	HECT, UBA and WWE domain containing 1, E3 ubiquitin protein ligase	10075	ENSG00000086758
SETD8	NA	SETD8	SET domain containing (lysine methyltransferase) 8	387893	ENSG00000183955
CCND3	NA	CCND3	cyclin D3	896	ENSG00000112576
PRKG1	NA	PRKG1	protein kinase, cGMP-dependent, type I	5592	ENSG00000185532
BAX	NA	BAX	BCL2-associated X protein	581	ENSG00000087088
DCP1A	NA	DCP1A	DCP1 decapping enzyme homolog A (S. cerevisiae)	55802	NULL
LSP1	NA	LSP1	lymphocyte-specific protein 1	4046	ENSG00000130592
WWP1	NA	WWP1	WW domain containing E3 ubiquitin protein ligase 1	11059	ENSG00000123124
CXCL12	NA	CXCL12	chemokine (C-X-C motif) ligand 12	6387	ENSG00000107562
GNAI2	NA	GNAI2	guanine nucleotide binding protein (G protein), alpha inhibiting activity polypeptide 2	2771	ENSG00000114353
NCOA2	NA	NCOA2	nuclear receptor coactivator 2	10499	ENSG00000140396
KDELR1	NA	KDELR1	KDEL (Lys-Asp-Glu-Leu) endoplasmic reticulum protein retention receptor 1	10945	ENSG00000105438
TGFB1	NA	TGFB1	transforming growth factor, beta 1	7040	ENSG00000105329
HES1	NA	HES1	hairy and enhancer of split 1, (Drosophila)	3280	ENSG00000114315
IL17RD	NA	IL17RD	interleukin 17 receptor D	54756	ENSG00000144730
CDC25A	NA	CDC25A	cell division cycle 25 homolog A (S. pombe)	993	ENSG00000164045
PPP3CA	NA	PPP3CA	protein phosphatase 3, catalytic subunit, alpha isozyme	5530	ENSG00000138814
FOXO4	NA	FOXO4	forkhead box O4	4303	ENSG00000184481
LAMC1	NA	LAMC1	laminin, gamma 1 (formerly LAMB2)	3915	ENSG00000135862
TNFAIP3	NA	TNFAIP3	tumor necrosis factor, alpha-induced protein 3	7128	ENSG00000118503
RBBP7	NA	RBBP7	retinoblastoma binding protein 7	5931	ENSG00000102054
RB1CC1	NA	RB1CC1	RB1-inducible coiled-coil 1	9821	ENSG00000023287
PLAUR	NA	PLAUR	plasminogen activator, urokinase receptor	5329	ENSG00000011422
PIK3R1	NA	PIK3R1	phosphoinositide-3-kinase, regulatory subunit 1 (alpha)	5295	ENSG00000145675
SKP2	NA	SKP2	S-phase kinase-associated protein 2, E3 ubiquitin protein ligase	6502	ENSG00000145604
HMGCS2	NA	HMGCS2	3-hydroxy-3-methylglutaryl-CoA synthase 2 (mitochondrial)	3158	ENSG00000134240
PRDM1	NA	PRDM1	PR domain containing 1, with ZNF domain	639	ENSG00000057657
HSPA1B	NA	HSPA1B	heat shock 70kDa protein 1B	3304	ENSG00000204388
BCL10	NA	BCL10	B-cell CLL/lymphoma 10	8915	ENSG00000142867
GPLD1	NA	GPLD1	glycosylphosphatidylinositol specific phospholipase D1	2822	ENSG00000112293
IFNA21	NA	IFNA21	interferon, alpha 21	3452	ENSG00000137080
TSC1	NA	TSC1	tuberous sclerosis 1	7248	ENSG00000165699
GNA12	NA	GNA12	guanine nucleotide binding protein (G protein) alpha 12	2768	ENSG00000146535
CXCR4	NA	CXCR4	chemokine (C-X-C motif) receptor 4	7852	ENSG00000121966
ELMO1	NA	ELMO1	engulfment and cell motility 1	9844	ENSG00000155849
PRDX3	NA	PRDX3	peroxiredoxin 3	10935	ENSG00000165672
NCOA4	NA	NCOA4	nuclear receptor coactivator 4	8031	ENSG00000138293
AKT3	NA	AKT3	v-akt murine thymoma viral oncogene homolog 3 (protein kinase B, gamma)	10000	ENSG00000117020
CAMK2B	NA	CAMK2B	calcium/calmodulin-dependent protein kinase II beta	816	ENSG00000058404
TADA2B	NA	TADA2B	transcriptional adaptor 2B	93624	ENSG00000173011
SVIL	NA	SVIL	supervillin	6840	ENSG00000197321
COL1A2	NA	COL1A2	collagen, type I, alpha 2	1278	ENSG00000164692
ITGAV	NA	ITGAV	integrin, alpha V	3685	ENSG00000138448
ARPC2	NA	ARPC2	actin related protein 2/3 complex, subunit 2, 34kDa	10109	ENSG00000163466
JAK3	NA	JAK3	Janus kinase 3	3718	ENSG00000105639
BTRC	NA	BTRC	beta-transducin repeat containing E3 ubiquitin protein ligase	8945	ENSG00000166167
Pathway Commons pathway	VEGF and VEGFR signaling network	DB_ID:1575
C=1304;O=119;E=39.37;R=3.02;rawP=8.04e-27;adjP=5.58e-25
KDR	NA	KDR	kinase insert domain receptor (a type III receptor tyrosine kinase)	3791	ENSG00000128052
SUMO2	NA	SUMO2	SMT3 suppressor of mif two 3 homolog 2 (S. cerevisiae)	6613	ENSG00000188612
EGF	NA	EGF	epidermal growth factor	1950	ENSG00000138798
PBX1	NA	PBX1	pre-B-cell leukemia homeobox 1	5087	ENSG00000185630
COL18A1	NA	COL18A1	collagen, type XVIII, alpha 1	80781	ENSG00000182871
IL13RA1	NA	IL13RA1	interleukin 13 receptor, alpha 1	3597	ENSG00000131724
LYN	NA	LYN	v-yes-1 Yamaguchi sarcoma viral related oncogene homolog	4067	ENSG00000254087
AIFM2	NA	AIFM2	apoptosis-inducing factor, mitochondrion-associated, 2	84883	ENSG00000042286
HSPA1A	NA	HSPA1A	heat shock 70kDa protein 1A	3303	ENSG00000204389
RPL11	NA	RPL11	ribosomal protein L11	6135	ENSG00000142676
CSDE1	NA	CSDE1	cold shock domain containing E1, RNA-binding	7812	ENSG00000009307
CCNA2	NA	CCNA2	cyclin A2	890	ENSG00000145386
ASAP2	NA	ASAP2	ArfGAP with SH3 domain, ankyrin repeat and PH domain 2	8853	ENSG00000151693
PLAU	NA	PLAU	plasminogen activator, urokinase	5328	ENSG00000122861
SHC1	NA	SHC1	SHC (Src homology 2 domain containing) transforming protein 1	6464	ENSG00000160691
UBE2D1	NA	UBE2D1	ubiquitin-conjugating enzyme E2D 1	7321	ENSG00000072401
CASP8	NA	CASP8	caspase 8, apoptosis-related cysteine peptidase	841	ENSG00000064012
SNAI2	NA	SNAI2	snail homolog 2 (Drosophila)	6591	ENSG00000019549
ITSN1	NA	ITSN1	intersectin 1 (SH3 domain protein)	6453	ENSG00000205726
SP5	NA	SP5	Sp5 transcription factor	389058	ENSG00000204335
PDGFRB	NA	PDGFRB	platelet-derived growth factor receptor, beta polypeptide	5159	ENSG00000113721
PTPRK	NA	PTPRK	protein tyrosine phosphatase, receptor type, K	5796	ENSG00000152894
USO1	NA	USO1	USO1 vesicle docking protein homolog (yeast)	8615	ENSG00000138768
GJA1	NA	GJA1	gap junction protein, alpha 1, 43kDa	2697	ENSG00000152661
RIPK2	NA	RIPK2	receptor-interacting serine-threonine kinase 2	8767	ENSG00000104312
RNF144B	NA	RNF144B	ring finger protein 144B	255488	ENSG00000137393
HSP90AB1	NA	HSP90AB1	heat shock protein 90kDa alpha (cytosolic), class B member 1	3326	ENSG00000096384
NCL	NA	NCL	nucleolin	4691	ENSG00000115053
IL10	NA	IL10	interleukin 10	3586	ENSG00000136634
SMYD2	NA	SMYD2	SET and MYND domain containing 2	56950	ENSG00000143499
SESN1	NA	SESN1	sestrin 1	27244	ENSG00000080546
MAP3K6	NA	MAP3K6	mitogen-activated protein kinase kinase kinase 6	9064	ENSG00000142733
SH3GL1	NA	SH3GL1	SH3-domain GRB2-like 1	6455	ENSG00000141985
ITGB2	NA	ITGB2	integrin, beta 2 (complement component 3 receptor 3 and 4 subunit)	3689	ENSG00000160255
PPP2CA	NA	PPP2CA	protein phosphatase 2, catalytic subunit, alpha isozyme	5515	ENSG00000113575
RBL1	NA	RBL1	retinoblastoma-like 1 (p107)	5933	ENSG00000080839
KLF4	NA	KLF4	Kruppel-like factor 4 (gut)	9314	ENSG00000136826
PTMA	NA	PTMA	prothymosin, alpha	5757	ENSG00000187514
NCK2	NA	NCK2	NCK adaptor protein 2	8440	ENSG00000071051
GSK3B	NA	GSK3B	glycogen synthase kinase 3 beta	2932	ENSG00000082701
RCAN2	NA	RCAN2	regulator of calcineurin 2	10231	ENSG00000172348
HGF	NA	HGF	hepatocyte growth factor (hepapoietin A; scatter factor)	3082	ENSG00000019991
SMAD1	NA	SMAD1	SMAD family member 1	4086	ENSG00000170365
CTDSP1	NA	CTDSP1	CTD (carboxy-terminal domain, RNA polymerase II, polypeptide A) small phosphatase 1	58190	ENSG00000144579
MAPK12	NA	MAPK12	mitogen-activated protein kinase 12	6300	ENSG00000188130
TNIK	NA	TNIK	TRAF2 and NCK interacting kinase	23043	ENSG00000154310
FN1	NA	FN1	fibronectin 1	2335	ENSG00000115414
EGR1	NA	EGR1	early growth response 1	1958	ENSG00000120738
TFF3	NA	TFF3	trefoil factor 3 (intestinal)	7033	ENSG00000160180
LNPEP	NA	LNPEP	leucyl/cystinyl aminopeptidase	4012	ENSG00000113441
CCM2	NA	CCM2	cerebral cavernous malformation 2	83605	ENSG00000136280
SDC2	NA	SDC2	syndecan 2	6383	ENSG00000169439
TGFBR1	NA	TGFBR1	transforming growth factor, beta receptor 1	7046	ENSG00000106799
ACTN2	NA	ACTN2	actinin, alpha 2	88	ENSG00000077522
ARF1	NA	ARF1	ADP-ribosylation factor 1	375	ENSG00000143761
PPP3CB	NA	PPP3CB	protein phosphatase 3, catalytic subunit, beta isozyme	5532	ENSG00000107758
MLH1	NA	MLH1	mutL homolog 1, colon cancer, nonpolyposis type 2 (E. coli)	4292	ENSG00000076242
SFXN3	NA	SFXN3	sideroflexin 3	81855	ENSG00000107819
BMP6	NA	BMP6	bone morphogenetic protein 6	654	ENSG00000153162
NRP2	NA	NRP2	neuropilin 2	8828	ENSG00000118257
JMY	NA	JMY	junction mediating and regulatory protein, p53 cofactor	133746	ENSG00000152409
CFLAR	NA	CFLAR	CASP8 and FADD-like apoptosis regulator	8837	ENSG00000003402
GDI1	NA	GDI1	GDP dissociation inhibitor 1	2664	ENSG00000203879
PRKCE	NA	PRKCE	protein kinase C, epsilon	5581	ENSG00000171132
JUN	NA	JUN	jun proto-oncogene	3725	ENSG00000177606
FKBP1A	NA	FKBP1A	FK506 binding protein 1A, 12kDa	2280	ENSG00000088832
CAPN2	NA	CAPN2	calpain 2, (m/II) large subunit	824	ENSG00000162909
PTPN1	NA	PTPN1	protein tyrosine phosphatase, non-receptor type 1	5770	ENSG00000196396
VASP	NA	VASP	vasodilator-stimulated phosphoprotein	7408	ENSG00000125753
DAB2	NA	DAB2	disabled homolog 2, mitogen-responsive phosphoprotein (Drosophila)	1601	ENSG00000153071
TIMP1	NA	TIMP1	TIMP metallopeptidase inhibitor 1	7076	ENSG00000102265
GATA2	NA	GATA2	GATA binding protein 2	2624	ENSG00000179348
ARPC5	NA	ARPC5	actin related protein 2/3 complex, subunit 5, 16kDa	10092	ENSG00000162704
HUWE1	NA	HUWE1	HECT, UBA and WWE domain containing 1, E3 ubiquitin protein ligase	10075	ENSG00000086758
SETD8	NA	SETD8	SET domain containing (lysine methyltransferase) 8	387893	ENSG00000183955
CCND3	NA	CCND3	cyclin D3	896	ENSG00000112576
PRKG1	NA	PRKG1	protein kinase, cGMP-dependent, type I	5592	ENSG00000185532
BAX	NA	BAX	BCL2-associated X protein	581	ENSG00000087088
DCP1A	NA	DCP1A	DCP1 decapping enzyme homolog A (S. cerevisiae)	55802	NULL
LSP1	NA	LSP1	lymphocyte-specific protein 1	4046	ENSG00000130592
WWP1	NA	WWP1	WW domain containing E3 ubiquitin protein ligase 1	11059	ENSG00000123124
CXCL12	NA	CXCL12	chemokine (C-X-C motif) ligand 12	6387	ENSG00000107562
GNAI2	NA	GNAI2	guanine nucleotide binding protein (G protein), alpha inhibiting activity polypeptide 2	2771	ENSG00000114353
NCOA2	NA	NCOA2	nuclear receptor coactivator 2	10499	ENSG00000140396
KDELR1	NA	KDELR1	KDEL (Lys-Asp-Glu-Leu) endoplasmic reticulum protein retention receptor 1	10945	ENSG00000105438
TGFB1	NA	TGFB1	transforming growth factor, beta 1	7040	ENSG00000105329
HES1	NA	HES1	hairy and enhancer of split 1, (Drosophila)	3280	ENSG00000114315
IL17RD	NA	IL17RD	interleukin 17 receptor D	54756	ENSG00000144730
CDC25A	NA	CDC25A	cell division cycle 25 homolog A (S. pombe)	993	ENSG00000164045
PPP3CA	NA	PPP3CA	protein phosphatase 3, catalytic subunit, alpha isozyme	5530	ENSG00000138814
FOXO4	NA	FOXO4	forkhead box O4	4303	ENSG00000184481
LAMC1	NA	LAMC1	laminin, gamma 1 (formerly LAMB2)	3915	ENSG00000135862
TNFAIP3	NA	TNFAIP3	tumor necrosis factor, alpha-induced protein 3	7128	ENSG00000118503
RBBP7	NA	RBBP7	retinoblastoma binding protein 7	5931	ENSG00000102054
RB1CC1	NA	RB1CC1	RB1-inducible coiled-coil 1	9821	ENSG00000023287
PLAUR	NA	PLAUR	plasminogen activator, urokinase receptor	5329	ENSG00000011422
PIK3R1	NA	PIK3R1	phosphoinositide-3-kinase, regulatory subunit 1 (alpha)	5295	ENSG00000145675
SKP2	NA	SKP2	S-phase kinase-associated protein 2, E3 ubiquitin protein ligase	6502	ENSG00000145604
HMGCS2	NA	HMGCS2	3-hydroxy-3-methylglutaryl-CoA synthase 2 (mitochondrial)	3158	ENSG00000134240
PRDM1	NA	PRDM1	PR domain containing 1, with ZNF domain	639	ENSG00000057657
HSPA1B	NA	HSPA1B	heat shock 70kDa protein 1B	3304	ENSG00000204388
BCL10	NA	BCL10	B-cell CLL/lymphoma 10	8915	ENSG00000142867
GPLD1	NA	GPLD1	glycosylphosphatidylinositol specific phospholipase D1	2822	ENSG00000112293
IFNA21	NA	IFNA21	interferon, alpha 21	3452	ENSG00000137080
TSC1	NA	TSC1	tuberous sclerosis 1	7248	ENSG00000165699
GNA12	NA	GNA12	guanine nucleotide binding protein (G protein) alpha 12	2768	ENSG00000146535
CXCR4	NA	CXCR4	chemokine (C-X-C motif) receptor 4	7852	ENSG00000121966
ELMO1	NA	ELMO1	engulfment and cell motility 1	9844	ENSG00000155849
PRDX3	NA	PRDX3	peroxiredoxin 3	10935	ENSG00000165672
NCOA4	NA	NCOA4	nuclear receptor coactivator 4	8031	ENSG00000138293
AKT3	NA	AKT3	v-akt murine thymoma viral oncogene homolog 3 (protein kinase B, gamma)	10000	ENSG00000117020
CAMK2B	NA	CAMK2B	calcium/calmodulin-dependent protein kinase II beta	816	ENSG00000058404
TADA2B	NA	TADA2B	transcriptional adaptor 2B	93624	ENSG00000173011
SVIL	NA	SVIL	supervillin	6840	ENSG00000197321
COL1A2	NA	COL1A2	collagen, type I, alpha 2	1278	ENSG00000164692
ITGAV	NA	ITGAV	integrin, alpha V	3685	ENSG00000138448
ARPC2	NA	ARPC2	actin related protein 2/3 complex, subunit 2, 34kDa	10109	ENSG00000163466
JAK3	NA	JAK3	Janus kinase 3	3718	ENSG00000105639
BTRC	NA	BTRC	beta-transducin repeat containing E3 ubiquitin protein ligase	8945	ENSG00000166167
Pathway Commons pathway	Endothelins	DB_ID:1619
C=1307;O=119;E=39.46;R=3.02;rawP=9.84e-27;adjP=6.07e-25
KDR	NA	KDR	kinase insert domain receptor (a type III receptor tyrosine kinase)	3791	ENSG00000128052
SUMO2	NA	SUMO2	SMT3 suppressor of mif two 3 homolog 2 (S. cerevisiae)	6613	ENSG00000188612
EGF	NA	EGF	epidermal growth factor	1950	ENSG00000138798
PBX1	NA	PBX1	pre-B-cell leukemia homeobox 1	5087	ENSG00000185630
COL18A1	NA	COL18A1	collagen, type XVIII, alpha 1	80781	ENSG00000182871
IL13RA1	NA	IL13RA1	interleukin 13 receptor, alpha 1	3597	ENSG00000131724
LYN	NA	LYN	v-yes-1 Yamaguchi sarcoma viral related oncogene homolog	4067	ENSG00000254087
AIFM2	NA	AIFM2	apoptosis-inducing factor, mitochondrion-associated, 2	84883	ENSG00000042286
HSPA1A	NA	HSPA1A	heat shock 70kDa protein 1A	3303	ENSG00000204389
RPL11	NA	RPL11	ribosomal protein L11	6135	ENSG00000142676
CSDE1	NA	CSDE1	cold shock domain containing E1, RNA-binding	7812	ENSG00000009307
CCNA2	NA	CCNA2	cyclin A2	890	ENSG00000145386
ASAP2	NA	ASAP2	ArfGAP with SH3 domain, ankyrin repeat and PH domain 2	8853	ENSG00000151693
PLAU	NA	PLAU	plasminogen activator, urokinase	5328	ENSG00000122861
SHC1	NA	SHC1	SHC (Src homology 2 domain containing) transforming protein 1	6464	ENSG00000160691
ADCY3	NA	ADCY3	adenylate cyclase 3	109	ENSG00000138031
UBE2D1	NA	UBE2D1	ubiquitin-conjugating enzyme E2D 1	7321	ENSG00000072401
CASP8	NA	CASP8	caspase 8, apoptosis-related cysteine peptidase	841	ENSG00000064012
SNAI2	NA	SNAI2	snail homolog 2 (Drosophila)	6591	ENSG00000019549
ITSN1	NA	ITSN1	intersectin 1 (SH3 domain protein)	6453	ENSG00000205726
SP5	NA	SP5	Sp5 transcription factor	389058	ENSG00000204335
PDGFRB	NA	PDGFRB	platelet-derived growth factor receptor, beta polypeptide	5159	ENSG00000113721
PTPRK	NA	PTPRK	protein tyrosine phosphatase, receptor type, K	5796	ENSG00000152894
USO1	NA	USO1	USO1 vesicle docking protein homolog (yeast)	8615	ENSG00000138768
GJA1	NA	GJA1	gap junction protein, alpha 1, 43kDa	2697	ENSG00000152661
RIPK2	NA	RIPK2	receptor-interacting serine-threonine kinase 2	8767	ENSG00000104312
RNF144B	NA	RNF144B	ring finger protein 144B	255488	ENSG00000137393
NCL	NA	NCL	nucleolin	4691	ENSG00000115053
IL10	NA	IL10	interleukin 10	3586	ENSG00000136634
SMYD2	NA	SMYD2	SET and MYND domain containing 2	56950	ENSG00000143499
SESN1	NA	SESN1	sestrin 1	27244	ENSG00000080546
MAP3K6	NA	MAP3K6	mitogen-activated protein kinase kinase kinase 6	9064	ENSG00000142733
SH3GL1	NA	SH3GL1	SH3-domain GRB2-like 1	6455	ENSG00000141985
ITGB2	NA	ITGB2	integrin, beta 2 (complement component 3 receptor 3 and 4 subunit)	3689	ENSG00000160255
PPP2CA	NA	PPP2CA	protein phosphatase 2, catalytic subunit, alpha isozyme	5515	ENSG00000113575
RBL1	NA	RBL1	retinoblastoma-like 1 (p107)	5933	ENSG00000080839
KLF4	NA	KLF4	Kruppel-like factor 4 (gut)	9314	ENSG00000136826
PTMA	NA	PTMA	prothymosin, alpha	5757	ENSG00000187514
NCK2	NA	NCK2	NCK adaptor protein 2	8440	ENSG00000071051
GSK3B	NA	GSK3B	glycogen synthase kinase 3 beta	2932	ENSG00000082701
RCAN2	NA	RCAN2	regulator of calcineurin 2	10231	ENSG00000172348
HGF	NA	HGF	hepatocyte growth factor (hepapoietin A; scatter factor)	3082	ENSG00000019991
SMAD1	NA	SMAD1	SMAD family member 1	4086	ENSG00000170365
CTDSP1	NA	CTDSP1	CTD (carboxy-terminal domain, RNA polymerase II, polypeptide A) small phosphatase 1	58190	ENSG00000144579
MAPK12	NA	MAPK12	mitogen-activated protein kinase 12	6300	ENSG00000188130
TNIK	NA	TNIK	TRAF2 and NCK interacting kinase	23043	ENSG00000154310
FN1	NA	FN1	fibronectin 1	2335	ENSG00000115414
EGR1	NA	EGR1	early growth response 1	1958	ENSG00000120738
TFF3	NA	TFF3	trefoil factor 3 (intestinal)	7033	ENSG00000160180
LNPEP	NA	LNPEP	leucyl/cystinyl aminopeptidase	4012	ENSG00000113441
CCM2	NA	CCM2	cerebral cavernous malformation 2	83605	ENSG00000136280
SDC2	NA	SDC2	syndecan 2	6383	ENSG00000169439
TGFBR1	NA	TGFBR1	transforming growth factor, beta receptor 1	7046	ENSG00000106799
ACTN2	NA	ACTN2	actinin, alpha 2	88	ENSG00000077522
ARF1	NA	ARF1	ADP-ribosylation factor 1	375	ENSG00000143761
PPP3CB	NA	PPP3CB	protein phosphatase 3, catalytic subunit, beta isozyme	5532	ENSG00000107758
MLH1	NA	MLH1	mutL homolog 1, colon cancer, nonpolyposis type 2 (E. coli)	4292	ENSG00000076242
SFXN3	NA	SFXN3	sideroflexin 3	81855	ENSG00000107819
BMP6	NA	BMP6	bone morphogenetic protein 6	654	ENSG00000153162
COL3A1	NA	COL3A1	collagen, type III, alpha 1	1281	ENSG00000168542
JMY	NA	JMY	junction mediating and regulatory protein, p53 cofactor	133746	ENSG00000152409
CFLAR	NA	CFLAR	CASP8 and FADD-like apoptosis regulator	8837	ENSG00000003402
GDI1	NA	GDI1	GDP dissociation inhibitor 1	2664	ENSG00000203879
PRKCE	NA	PRKCE	protein kinase C, epsilon	5581	ENSG00000171132
JUN	NA	JUN	jun proto-oncogene	3725	ENSG00000177606
FKBP1A	NA	FKBP1A	FK506 binding protein 1A, 12kDa	2280	ENSG00000088832
CAPN2	NA	CAPN2	calpain 2, (m/II) large subunit	824	ENSG00000162909
PTPN1	NA	PTPN1	protein tyrosine phosphatase, non-receptor type 1	5770	ENSG00000196396
VASP	NA	VASP	vasodilator-stimulated phosphoprotein	7408	ENSG00000125753
DAB2	NA	DAB2	disabled homolog 2, mitogen-responsive phosphoprotein (Drosophila)	1601	ENSG00000153071
TIMP1	NA	TIMP1	TIMP metallopeptidase inhibitor 1	7076	ENSG00000102265
GATA2	NA	GATA2	GATA binding protein 2	2624	ENSG00000179348
ARPC5	NA	ARPC5	actin related protein 2/3 complex, subunit 5, 16kDa	10092	ENSG00000162704
HUWE1	NA	HUWE1	HECT, UBA and WWE domain containing 1, E3 ubiquitin protein ligase	10075	ENSG00000086758
SETD8	NA	SETD8	SET domain containing (lysine methyltransferase) 8	387893	ENSG00000183955
CCND3	NA	CCND3	cyclin D3	896	ENSG00000112576
PRKG1	NA	PRKG1	protein kinase, cGMP-dependent, type I	5592	ENSG00000185532
BAX	NA	BAX	BCL2-associated X protein	581	ENSG00000087088
DCP1A	NA	DCP1A	DCP1 decapping enzyme homolog A (S. cerevisiae)	55802	NULL
LSP1	NA	LSP1	lymphocyte-specific protein 1	4046	ENSG00000130592
WWP1	NA	WWP1	WW domain containing E3 ubiquitin protein ligase 1	11059	ENSG00000123124
CXCL12	NA	CXCL12	chemokine (C-X-C motif) ligand 12	6387	ENSG00000107562
GNAI2	NA	GNAI2	guanine nucleotide binding protein (G protein), alpha inhibiting activity polypeptide 2	2771	ENSG00000114353
NCOA2	NA	NCOA2	nuclear receptor coactivator 2	10499	ENSG00000140396
KDELR1	NA	KDELR1	KDEL (Lys-Asp-Glu-Leu) endoplasmic reticulum protein retention receptor 1	10945	ENSG00000105438
TGFB1	NA	TGFB1	transforming growth factor, beta 1	7040	ENSG00000105329
HES1	NA	HES1	hairy and enhancer of split 1, (Drosophila)	3280	ENSG00000114315
IL17RD	NA	IL17RD	interleukin 17 receptor D	54756	ENSG00000144730
CDC25A	NA	CDC25A	cell division cycle 25 homolog A (S. pombe)	993	ENSG00000164045
PPP3CA	NA	PPP3CA	protein phosphatase 3, catalytic subunit, alpha isozyme	5530	ENSG00000138814
FOXO4	NA	FOXO4	forkhead box O4	4303	ENSG00000184481
LAMC1	NA	LAMC1	laminin, gamma 1 (formerly LAMB2)	3915	ENSG00000135862
TNFAIP3	NA	TNFAIP3	tumor necrosis factor, alpha-induced protein 3	7128	ENSG00000118503
RBBP7	NA	RBBP7	retinoblastoma binding protein 7	5931	ENSG00000102054
RB1CC1	NA	RB1CC1	RB1-inducible coiled-coil 1	9821	ENSG00000023287
PLAUR	NA	PLAUR	plasminogen activator, urokinase receptor	5329	ENSG00000011422
PIK3R1	NA	PIK3R1	phosphoinositide-3-kinase, regulatory subunit 1 (alpha)	5295	ENSG00000145675
SKP2	NA	SKP2	S-phase kinase-associated protein 2, E3 ubiquitin protein ligase	6502	ENSG00000145604
HMGCS2	NA	HMGCS2	3-hydroxy-3-methylglutaryl-CoA synthase 2 (mitochondrial)	3158	ENSG00000134240
PRDM1	NA	PRDM1	PR domain containing 1, with ZNF domain	639	ENSG00000057657
HSPA1B	NA	HSPA1B	heat shock 70kDa protein 1B	3304	ENSG00000204388
BCL10	NA	BCL10	B-cell CLL/lymphoma 10	8915	ENSG00000142867
GPLD1	NA	GPLD1	glycosylphosphatidylinositol specific phospholipase D1	2822	ENSG00000112293
IFNA21	NA	IFNA21	interferon, alpha 21	3452	ENSG00000137080
TSC1	NA	TSC1	tuberous sclerosis 1	7248	ENSG00000165699
GNA12	NA	GNA12	guanine nucleotide binding protein (G protein) alpha 12	2768	ENSG00000146535
CXCR4	NA	CXCR4	chemokine (C-X-C motif) receptor 4	7852	ENSG00000121966
ELMO1	NA	ELMO1	engulfment and cell motility 1	9844	ENSG00000155849
PRDX3	NA	PRDX3	peroxiredoxin 3	10935	ENSG00000165672
NCOA4	NA	NCOA4	nuclear receptor coactivator 4	8031	ENSG00000138293
AKT3	NA	AKT3	v-akt murine thymoma viral oncogene homolog 3 (protein kinase B, gamma)	10000	ENSG00000117020
CAMK2B	NA	CAMK2B	calcium/calmodulin-dependent protein kinase II beta	816	ENSG00000058404
TADA2B	NA	TADA2B	transcriptional adaptor 2B	93624	ENSG00000173011
SVIL	NA	SVIL	supervillin	6840	ENSG00000197321
COL1A2	NA	COL1A2	collagen, type I, alpha 2	1278	ENSG00000164692
ITGAV	NA	ITGAV	integrin, alpha V	3685	ENSG00000138448
ARPC2	NA	ARPC2	actin related protein 2/3 complex, subunit 2, 34kDa	10109	ENSG00000163466
JAK3	NA	JAK3	Janus kinase 3	3718	ENSG00000105639
BTRC	NA	BTRC	beta-transducin repeat containing E3 ubiquitin protein ligase	8945	ENSG00000166167
Pathway Commons pathway	LKB1 signaling events	DB_ID:1649
C=1308;O=119;E=39.49;R=3.01;rawP=1.05e-26;adjP=6.07e-25
KDR	NA	KDR	kinase insert domain receptor (a type III receptor tyrosine kinase)	3791	ENSG00000128052
SUMO2	NA	SUMO2	SMT3 suppressor of mif two 3 homolog 2 (S. cerevisiae)	6613	ENSG00000188612
EGF	NA	EGF	epidermal growth factor	1950	ENSG00000138798
PBX1	NA	PBX1	pre-B-cell leukemia homeobox 1	5087	ENSG00000185630
COL18A1	NA	COL18A1	collagen, type XVIII, alpha 1	80781	ENSG00000182871
IL13RA1	NA	IL13RA1	interleukin 13 receptor, alpha 1	3597	ENSG00000131724
LYN	NA	LYN	v-yes-1 Yamaguchi sarcoma viral related oncogene homolog	4067	ENSG00000254087
AIFM2	NA	AIFM2	apoptosis-inducing factor, mitochondrion-associated, 2	84883	ENSG00000042286
HSPA1A	NA	HSPA1A	heat shock 70kDa protein 1A	3303	ENSG00000204389
RPL11	NA	RPL11	ribosomal protein L11	6135	ENSG00000142676
CSDE1	NA	CSDE1	cold shock domain containing E1, RNA-binding	7812	ENSG00000009307
CCNA2	NA	CCNA2	cyclin A2	890	ENSG00000145386
ASAP2	NA	ASAP2	ArfGAP with SH3 domain, ankyrin repeat and PH domain 2	8853	ENSG00000151693
PLAU	NA	PLAU	plasminogen activator, urokinase	5328	ENSG00000122861
SHC1	NA	SHC1	SHC (Src homology 2 domain containing) transforming protein 1	6464	ENSG00000160691
UBE2D1	NA	UBE2D1	ubiquitin-conjugating enzyme E2D 1	7321	ENSG00000072401
CASP8	NA	CASP8	caspase 8, apoptosis-related cysteine peptidase	841	ENSG00000064012
SNAI2	NA	SNAI2	snail homolog 2 (Drosophila)	6591	ENSG00000019549
ITSN1	NA	ITSN1	intersectin 1 (SH3 domain protein)	6453	ENSG00000205726
SP5	NA	SP5	Sp5 transcription factor	389058	ENSG00000204335
PDGFRB	NA	PDGFRB	platelet-derived growth factor receptor, beta polypeptide	5159	ENSG00000113721
PTPRK	NA	PTPRK	protein tyrosine phosphatase, receptor type, K	5796	ENSG00000152894
USO1	NA	USO1	USO1 vesicle docking protein homolog (yeast)	8615	ENSG00000138768
GJA1	NA	GJA1	gap junction protein, alpha 1, 43kDa	2697	ENSG00000152661
RIPK2	NA	RIPK2	receptor-interacting serine-threonine kinase 2	8767	ENSG00000104312
RNF144B	NA	RNF144B	ring finger protein 144B	255488	ENSG00000137393
EZR	NA	EZR	ezrin	7430	ENSG00000092820
NCL	NA	NCL	nucleolin	4691	ENSG00000115053
IL10	NA	IL10	interleukin 10	3586	ENSG00000136634
SMYD2	NA	SMYD2	SET and MYND domain containing 2	56950	ENSG00000143499
SESN1	NA	SESN1	sestrin 1	27244	ENSG00000080546
MAP3K6	NA	MAP3K6	mitogen-activated protein kinase kinase kinase 6	9064	ENSG00000142733
SH3GL1	NA	SH3GL1	SH3-domain GRB2-like 1	6455	ENSG00000141985
ITGB2	NA	ITGB2	integrin, beta 2 (complement component 3 receptor 3 and 4 subunit)	3689	ENSG00000160255
PPP2CA	NA	PPP2CA	protein phosphatase 2, catalytic subunit, alpha isozyme	5515	ENSG00000113575
RBL1	NA	RBL1	retinoblastoma-like 1 (p107)	5933	ENSG00000080839
KLF4	NA	KLF4	Kruppel-like factor 4 (gut)	9314	ENSG00000136826
PTMA	NA	PTMA	prothymosin, alpha	5757	ENSG00000187514
NCK2	NA	NCK2	NCK adaptor protein 2	8440	ENSG00000071051
GSK3B	NA	GSK3B	glycogen synthase kinase 3 beta	2932	ENSG00000082701
RCAN2	NA	RCAN2	regulator of calcineurin 2	10231	ENSG00000172348
HGF	NA	HGF	hepatocyte growth factor (hepapoietin A; scatter factor)	3082	ENSG00000019991
SMAD1	NA	SMAD1	SMAD family member 1	4086	ENSG00000170365
CTDSP1	NA	CTDSP1	CTD (carboxy-terminal domain, RNA polymerase II, polypeptide A) small phosphatase 1	58190	ENSG00000144579
MAPK12	NA	MAPK12	mitogen-activated protein kinase 12	6300	ENSG00000188130
TNIK	NA	TNIK	TRAF2 and NCK interacting kinase	23043	ENSG00000154310
FN1	NA	FN1	fibronectin 1	2335	ENSG00000115414
EGR1	NA	EGR1	early growth response 1	1958	ENSG00000120738
TFF3	NA	TFF3	trefoil factor 3 (intestinal)	7033	ENSG00000160180
LNPEP	NA	LNPEP	leucyl/cystinyl aminopeptidase	4012	ENSG00000113441
CCM2	NA	CCM2	cerebral cavernous malformation 2	83605	ENSG00000136280
SDC2	NA	SDC2	syndecan 2	6383	ENSG00000169439
TGFBR1	NA	TGFBR1	transforming growth factor, beta receptor 1	7046	ENSG00000106799
ACTN2	NA	ACTN2	actinin, alpha 2	88	ENSG00000077522
ARF1	NA	ARF1	ADP-ribosylation factor 1	375	ENSG00000143761
PPP3CB	NA	PPP3CB	protein phosphatase 3, catalytic subunit, beta isozyme	5532	ENSG00000107758
MLH1	NA	MLH1	mutL homolog 1, colon cancer, nonpolyposis type 2 (E. coli)	4292	ENSG00000076242
SFXN3	NA	SFXN3	sideroflexin 3	81855	ENSG00000107819
BMP6	NA	BMP6	bone morphogenetic protein 6	654	ENSG00000153162
JMY	NA	JMY	junction mediating and regulatory protein, p53 cofactor	133746	ENSG00000152409
CFLAR	NA	CFLAR	CASP8 and FADD-like apoptosis regulator	8837	ENSG00000003402
GDI1	NA	GDI1	GDP dissociation inhibitor 1	2664	ENSG00000203879
PRKCE	NA	PRKCE	protein kinase C, epsilon	5581	ENSG00000171132
JUN	NA	JUN	jun proto-oncogene	3725	ENSG00000177606
FKBP1A	NA	FKBP1A	FK506 binding protein 1A, 12kDa	2280	ENSG00000088832
CAPN2	NA	CAPN2	calpain 2, (m/II) large subunit	824	ENSG00000162909
PTPN1	NA	PTPN1	protein tyrosine phosphatase, non-receptor type 1	5770	ENSG00000196396
VASP	NA	VASP	vasodilator-stimulated phosphoprotein	7408	ENSG00000125753
DAB2	NA	DAB2	disabled homolog 2, mitogen-responsive phosphoprotein (Drosophila)	1601	ENSG00000153071
TIMP1	NA	TIMP1	TIMP metallopeptidase inhibitor 1	7076	ENSG00000102265
GATA2	NA	GATA2	GATA binding protein 2	2624	ENSG00000179348
ARPC5	NA	ARPC5	actin related protein 2/3 complex, subunit 5, 16kDa	10092	ENSG00000162704
HUWE1	NA	HUWE1	HECT, UBA and WWE domain containing 1, E3 ubiquitin protein ligase	10075	ENSG00000086758
SETD8	NA	SETD8	SET domain containing (lysine methyltransferase) 8	387893	ENSG00000183955
CCND3	NA	CCND3	cyclin D3	896	ENSG00000112576
PRKG1	NA	PRKG1	protein kinase, cGMP-dependent, type I	5592	ENSG00000185532
BAX	NA	BAX	BCL2-associated X protein	581	ENSG00000087088
DCP1A	NA	DCP1A	DCP1 decapping enzyme homolog A (S. cerevisiae)	55802	NULL
LSP1	NA	LSP1	lymphocyte-specific protein 1	4046	ENSG00000130592
WWP1	NA	WWP1	WW domain containing E3 ubiquitin protein ligase 1	11059	ENSG00000123124
CXCL12	NA	CXCL12	chemokine (C-X-C motif) ligand 12	6387	ENSG00000107562
GNAI2	NA	GNAI2	guanine nucleotide binding protein (G protein), alpha inhibiting activity polypeptide 2	2771	ENSG00000114353
NCOA2	NA	NCOA2	nuclear receptor coactivator 2	10499	ENSG00000140396
KDELR1	NA	KDELR1	KDEL (Lys-Asp-Glu-Leu) endoplasmic reticulum protein retention receptor 1	10945	ENSG00000105438
TGFB1	NA	TGFB1	transforming growth factor, beta 1	7040	ENSG00000105329
HES1	NA	HES1	hairy and enhancer of split 1, (Drosophila)	3280	ENSG00000114315
IL17RD	NA	IL17RD	interleukin 17 receptor D	54756	ENSG00000144730
CDC25A	NA	CDC25A	cell division cycle 25 homolog A (S. pombe)	993	ENSG00000164045
PPP3CA	NA	PPP3CA	protein phosphatase 3, catalytic subunit, alpha isozyme	5530	ENSG00000138814
FOXO4	NA	FOXO4	forkhead box O4	4303	ENSG00000184481
LAMC1	NA	LAMC1	laminin, gamma 1 (formerly LAMB2)	3915	ENSG00000135862
TNFAIP3	NA	TNFAIP3	tumor necrosis factor, alpha-induced protein 3	7128	ENSG00000118503
RBBP7	NA	RBBP7	retinoblastoma binding protein 7	5931	ENSG00000102054
RB1CC1	NA	RB1CC1	RB1-inducible coiled-coil 1	9821	ENSG00000023287
PLAUR	NA	PLAUR	plasminogen activator, urokinase receptor	5329	ENSG00000011422
PIK3R1	NA	PIK3R1	phosphoinositide-3-kinase, regulatory subunit 1 (alpha)	5295	ENSG00000145675
SKP2	NA	SKP2	S-phase kinase-associated protein 2, E3 ubiquitin protein ligase	6502	ENSG00000145604
HMGCS2	NA	HMGCS2	3-hydroxy-3-methylglutaryl-CoA synthase 2 (mitochondrial)	3158	ENSG00000134240
SMARCD3	NA	SMARCD3	SWI/SNF related, matrix associated, actin dependent regulator of chromatin, subfamily d, member 3	6604	ENSG00000082014
PRDM1	NA	PRDM1	PR domain containing 1, with ZNF domain	639	ENSG00000057657
HSPA1B	NA	HSPA1B	heat shock 70kDa protein 1B	3304	ENSG00000204388
BCL10	NA	BCL10	B-cell CLL/lymphoma 10	8915	ENSG00000142867
GPLD1	NA	GPLD1	glycosylphosphatidylinositol specific phospholipase D1	2822	ENSG00000112293
IFNA21	NA	IFNA21	interferon, alpha 21	3452	ENSG00000137080
TSC1	NA	TSC1	tuberous sclerosis 1	7248	ENSG00000165699
GNA12	NA	GNA12	guanine nucleotide binding protein (G protein) alpha 12	2768	ENSG00000146535
CXCR4	NA	CXCR4	chemokine (C-X-C motif) receptor 4	7852	ENSG00000121966
ELMO1	NA	ELMO1	engulfment and cell motility 1	9844	ENSG00000155849
PRDX3	NA	PRDX3	peroxiredoxin 3	10935	ENSG00000165672
NCOA4	NA	NCOA4	nuclear receptor coactivator 4	8031	ENSG00000138293
AKT3	NA	AKT3	v-akt murine thymoma viral oncogene homolog 3 (protein kinase B, gamma)	10000	ENSG00000117020
CAMK2B	NA	CAMK2B	calcium/calmodulin-dependent protein kinase II beta	816	ENSG00000058404
TADA2B	NA	TADA2B	transcriptional adaptor 2B	93624	ENSG00000173011
SVIL	NA	SVIL	supervillin	6840	ENSG00000197321
COL1A2	NA	COL1A2	collagen, type I, alpha 2	1278	ENSG00000164692
ITGAV	NA	ITGAV	integrin, alpha V	3685	ENSG00000138448
ARPC2	NA	ARPC2	actin related protein 2/3 complex, subunit 2, 34kDa	10109	ENSG00000163466
JAK3	NA	JAK3	Janus kinase 3	3718	ENSG00000105639
BTRC	NA	BTRC	beta-transducin repeat containing E3 ubiquitin protein ligase	8945	ENSG00000166167
Pathway Commons pathway	Sphingosine 1-phosphate (S1P) pathway	DB_ID:1635
C=1311;O=119;E=39.58;R=3.01;rawP=1.29e-26;adjP=6.79e-25
KDR	NA	KDR	kinase insert domain receptor (a type III receptor tyrosine kinase)	3791	ENSG00000128052
SUMO2	NA	SUMO2	SMT3 suppressor of mif two 3 homolog 2 (S. cerevisiae)	6613	ENSG00000188612
EGF	NA	EGF	epidermal growth factor	1950	ENSG00000138798
PBX1	NA	PBX1	pre-B-cell leukemia homeobox 1	5087	ENSG00000185630
COL18A1	NA	COL18A1	collagen, type XVIII, alpha 1	80781	ENSG00000182871
IL13RA1	NA	IL13RA1	interleukin 13 receptor, alpha 1	3597	ENSG00000131724
LYN	NA	LYN	v-yes-1 Yamaguchi sarcoma viral related oncogene homolog	4067	ENSG00000254087
AIFM2	NA	AIFM2	apoptosis-inducing factor, mitochondrion-associated, 2	84883	ENSG00000042286
HSPA1A	NA	HSPA1A	heat shock 70kDa protein 1A	3303	ENSG00000204389
RPL11	NA	RPL11	ribosomal protein L11	6135	ENSG00000142676
CSDE1	NA	CSDE1	cold shock domain containing E1, RNA-binding	7812	ENSG00000009307
CCNA2	NA	CCNA2	cyclin A2	890	ENSG00000145386
ASAP2	NA	ASAP2	ArfGAP with SH3 domain, ankyrin repeat and PH domain 2	8853	ENSG00000151693
PLAU	NA	PLAU	plasminogen activator, urokinase	5328	ENSG00000122861
SHC1	NA	SHC1	SHC (Src homology 2 domain containing) transforming protein 1	6464	ENSG00000160691
UBE2D1	NA	UBE2D1	ubiquitin-conjugating enzyme E2D 1	7321	ENSG00000072401
CASP8	NA	CASP8	caspase 8, apoptosis-related cysteine peptidase	841	ENSG00000064012
SNAI2	NA	SNAI2	snail homolog 2 (Drosophila)	6591	ENSG00000019549
ITSN1	NA	ITSN1	intersectin 1 (SH3 domain protein)	6453	ENSG00000205726
SP5	NA	SP5	Sp5 transcription factor	389058	ENSG00000204335
PDGFRB	NA	PDGFRB	platelet-derived growth factor receptor, beta polypeptide	5159	ENSG00000113721
PTPRK	NA	PTPRK	protein tyrosine phosphatase, receptor type, K	5796	ENSG00000152894
USO1	NA	USO1	USO1 vesicle docking protein homolog (yeast)	8615	ENSG00000138768
GJA1	NA	GJA1	gap junction protein, alpha 1, 43kDa	2697	ENSG00000152661
RIPK2	NA	RIPK2	receptor-interacting serine-threonine kinase 2	8767	ENSG00000104312
RNF144B	NA	RNF144B	ring finger protein 144B	255488	ENSG00000137393
NCL	NA	NCL	nucleolin	4691	ENSG00000115053
IL10	NA	IL10	interleukin 10	3586	ENSG00000136634
SMYD2	NA	SMYD2	SET and MYND domain containing 2	56950	ENSG00000143499
SESN1	NA	SESN1	sestrin 1	27244	ENSG00000080546
MAP3K6	NA	MAP3K6	mitogen-activated protein kinase kinase kinase 6	9064	ENSG00000142733
SH3GL1	NA	SH3GL1	SH3-domain GRB2-like 1	6455	ENSG00000141985
ITGB2	NA	ITGB2	integrin, beta 2 (complement component 3 receptor 3 and 4 subunit)	3689	ENSG00000160255
PPP2CA	NA	PPP2CA	protein phosphatase 2, catalytic subunit, alpha isozyme	5515	ENSG00000113575
RBL1	NA	RBL1	retinoblastoma-like 1 (p107)	5933	ENSG00000080839
KLF4	NA	KLF4	Kruppel-like factor 4 (gut)	9314	ENSG00000136826
PTMA	NA	PTMA	prothymosin, alpha	5757	ENSG00000187514
NCK2	NA	NCK2	NCK adaptor protein 2	8440	ENSG00000071051
GSK3B	NA	GSK3B	glycogen synthase kinase 3 beta	2932	ENSG00000082701
RCAN2	NA	RCAN2	regulator of calcineurin 2	10231	ENSG00000172348
HGF	NA	HGF	hepatocyte growth factor (hepapoietin A; scatter factor)	3082	ENSG00000019991
SMAD1	NA	SMAD1	SMAD family member 1	4086	ENSG00000170365
CTDSP1	NA	CTDSP1	CTD (carboxy-terminal domain, RNA polymerase II, polypeptide A) small phosphatase 1	58190	ENSG00000144579
MAPK12	NA	MAPK12	mitogen-activated protein kinase 12	6300	ENSG00000188130
TNIK	NA	TNIK	TRAF2 and NCK interacting kinase	23043	ENSG00000154310
FN1	NA	FN1	fibronectin 1	2335	ENSG00000115414
EGR1	NA	EGR1	early growth response 1	1958	ENSG00000120738
TFF3	NA	TFF3	trefoil factor 3 (intestinal)	7033	ENSG00000160180
LNPEP	NA	LNPEP	leucyl/cystinyl aminopeptidase	4012	ENSG00000113441
CCM2	NA	CCM2	cerebral cavernous malformation 2	83605	ENSG00000136280
SDC2	NA	SDC2	syndecan 2	6383	ENSG00000169439
AIFM1	NA	AIFM1	apoptosis-inducing factor, mitochondrion-associated, 1	9131	ENSG00000156709
TGFBR1	NA	TGFBR1	transforming growth factor, beta receptor 1	7046	ENSG00000106799
ACTN2	NA	ACTN2	actinin, alpha 2	88	ENSG00000077522
ARF1	NA	ARF1	ADP-ribosylation factor 1	375	ENSG00000143761
PPP3CB	NA	PPP3CB	protein phosphatase 3, catalytic subunit, beta isozyme	5532	ENSG00000107758
MLH1	NA	MLH1	mutL homolog 1, colon cancer, nonpolyposis type 2 (E. coli)	4292	ENSG00000076242
SFXN3	NA	SFXN3	sideroflexin 3	81855	ENSG00000107819
BMP6	NA	BMP6	bone morphogenetic protein 6	654	ENSG00000153162
JMY	NA	JMY	junction mediating and regulatory protein, p53 cofactor	133746	ENSG00000152409
CFLAR	NA	CFLAR	CASP8 and FADD-like apoptosis regulator	8837	ENSG00000003402
SGPL1	NA	SGPL1	sphingosine-1-phosphate lyase 1	8879	ENSG00000166224
GDI1	NA	GDI1	GDP dissociation inhibitor 1	2664	ENSG00000203879
PRKCE	NA	PRKCE	protein kinase C, epsilon	5581	ENSG00000171132
JUN	NA	JUN	jun proto-oncogene	3725	ENSG00000177606
FKBP1A	NA	FKBP1A	FK506 binding protein 1A, 12kDa	2280	ENSG00000088832
CAPN2	NA	CAPN2	calpain 2, (m/II) large subunit	824	ENSG00000162909
PTPN1	NA	PTPN1	protein tyrosine phosphatase, non-receptor type 1	5770	ENSG00000196396
VASP	NA	VASP	vasodilator-stimulated phosphoprotein	7408	ENSG00000125753
DAB2	NA	DAB2	disabled homolog 2, mitogen-responsive phosphoprotein (Drosophila)	1601	ENSG00000153071
TIMP1	NA	TIMP1	TIMP metallopeptidase inhibitor 1	7076	ENSG00000102265
GATA2	NA	GATA2	GATA binding protein 2	2624	ENSG00000179348
ARPC5	NA	ARPC5	actin related protein 2/3 complex, subunit 5, 16kDa	10092	ENSG00000162704
HUWE1	NA	HUWE1	HECT, UBA and WWE domain containing 1, E3 ubiquitin protein ligase	10075	ENSG00000086758
SETD8	NA	SETD8	SET domain containing (lysine methyltransferase) 8	387893	ENSG00000183955
CCND3	NA	CCND3	cyclin D3	896	ENSG00000112576
PRKG1	NA	PRKG1	protein kinase, cGMP-dependent, type I	5592	ENSG00000185532
BAX	NA	BAX	BCL2-associated X protein	581	ENSG00000087088
DCP1A	NA	DCP1A	DCP1 decapping enzyme homolog A (S. cerevisiae)	55802	NULL
LSP1	NA	LSP1	lymphocyte-specific protein 1	4046	ENSG00000130592
WWP1	NA	WWP1	WW domain containing E3 ubiquitin protein ligase 1	11059	ENSG00000123124
CXCL12	NA	CXCL12	chemokine (C-X-C motif) ligand 12	6387	ENSG00000107562
GNAI2	NA	GNAI2	guanine nucleotide binding protein (G protein), alpha inhibiting activity polypeptide 2	2771	ENSG00000114353
NCOA2	NA	NCOA2	nuclear receptor coactivator 2	10499	ENSG00000140396
KDELR1	NA	KDELR1	KDEL (Lys-Asp-Glu-Leu) endoplasmic reticulum protein retention receptor 1	10945	ENSG00000105438
TGFB1	NA	TGFB1	transforming growth factor, beta 1	7040	ENSG00000105329
HES1	NA	HES1	hairy and enhancer of split 1, (Drosophila)	3280	ENSG00000114315
IL17RD	NA	IL17RD	interleukin 17 receptor D	54756	ENSG00000144730
CDC25A	NA	CDC25A	cell division cycle 25 homolog A (S. pombe)	993	ENSG00000164045
PPP3CA	NA	PPP3CA	protein phosphatase 3, catalytic subunit, alpha isozyme	5530	ENSG00000138814
FOXO4	NA	FOXO4	forkhead box O4	4303	ENSG00000184481
LAMC1	NA	LAMC1	laminin, gamma 1 (formerly LAMB2)	3915	ENSG00000135862
TNFAIP3	NA	TNFAIP3	tumor necrosis factor, alpha-induced protein 3	7128	ENSG00000118503
RBBP7	NA	RBBP7	retinoblastoma binding protein 7	5931	ENSG00000102054
RB1CC1	NA	RB1CC1	RB1-inducible coiled-coil 1	9821	ENSG00000023287
PLAUR	NA	PLAUR	plasminogen activator, urokinase receptor	5329	ENSG00000011422
PIK3R1	NA	PIK3R1	phosphoinositide-3-kinase, regulatory subunit 1 (alpha)	5295	ENSG00000145675
SKP2	NA	SKP2	S-phase kinase-associated protein 2, E3 ubiquitin protein ligase	6502	ENSG00000145604
HMGCS2	NA	HMGCS2	3-hydroxy-3-methylglutaryl-CoA synthase 2 (mitochondrial)	3158	ENSG00000134240
PRDM1	NA	PRDM1	PR domain containing 1, with ZNF domain	639	ENSG00000057657
HSPA1B	NA	HSPA1B	heat shock 70kDa protein 1B	3304	ENSG00000204388
BCL10	NA	BCL10	B-cell CLL/lymphoma 10	8915	ENSG00000142867
GPLD1	NA	GPLD1	glycosylphosphatidylinositol specific phospholipase D1	2822	ENSG00000112293
IFNA21	NA	IFNA21	interferon, alpha 21	3452	ENSG00000137080
TSC1	NA	TSC1	tuberous sclerosis 1	7248	ENSG00000165699
GNA12	NA	GNA12	guanine nucleotide binding protein (G protein) alpha 12	2768	ENSG00000146535
CXCR4	NA	CXCR4	chemokine (C-X-C motif) receptor 4	7852	ENSG00000121966
ELMO1	NA	ELMO1	engulfment and cell motility 1	9844	ENSG00000155849
PRDX3	NA	PRDX3	peroxiredoxin 3	10935	ENSG00000165672
NCOA4	NA	NCOA4	nuclear receptor coactivator 4	8031	ENSG00000138293
AKT3	NA	AKT3	v-akt murine thymoma viral oncogene homolog 3 (protein kinase B, gamma)	10000	ENSG00000117020
CAMK2B	NA	CAMK2B	calcium/calmodulin-dependent protein kinase II beta	816	ENSG00000058404
TADA2B	NA	TADA2B	transcriptional adaptor 2B	93624	ENSG00000173011
SVIL	NA	SVIL	supervillin	6840	ENSG00000197321
COL1A2	NA	COL1A2	collagen, type I, alpha 2	1278	ENSG00000164692
ITGAV	NA	ITGAV	integrin, alpha V	3685	ENSG00000138448
ARPC2	NA	ARPC2	actin related protein 2/3 complex, subunit 2, 34kDa	10109	ENSG00000163466
JAK3	NA	JAK3	Janus kinase 3	3718	ENSG00000105639
BTRC	NA	BTRC	beta-transducin repeat containing E3 ubiquitin protein ligase	8945	ENSG00000166167
Pathway Commons pathway	ErbB receptor signaling network	DB_ID:1573
C=1312;O=119;E=39.61;R=3.00;rawP=1.37e-26;adjP=6.79e-25
KDR	NA	KDR	kinase insert domain receptor (a type III receptor tyrosine kinase)	3791	ENSG00000128052
SUMO2	NA	SUMO2	SMT3 suppressor of mif two 3 homolog 2 (S. cerevisiae)	6613	ENSG00000188612
EGF	NA	EGF	epidermal growth factor	1950	ENSG00000138798
PBX1	NA	PBX1	pre-B-cell leukemia homeobox 1	5087	ENSG00000185630
COL18A1	NA	COL18A1	collagen, type XVIII, alpha 1	80781	ENSG00000182871
IL13RA1	NA	IL13RA1	interleukin 13 receptor, alpha 1	3597	ENSG00000131724
LYN	NA	LYN	v-yes-1 Yamaguchi sarcoma viral related oncogene homolog	4067	ENSG00000254087
AIFM2	NA	AIFM2	apoptosis-inducing factor, mitochondrion-associated, 2	84883	ENSG00000042286
HSPA1A	NA	HSPA1A	heat shock 70kDa protein 1A	3303	ENSG00000204389
ERBB4	NA	ERBB4	v-erb-a erythroblastic leukemia viral oncogene homolog 4 (avian)	2066	ENSG00000178568
RPL11	NA	RPL11	ribosomal protein L11	6135	ENSG00000142676
CSDE1	NA	CSDE1	cold shock domain containing E1, RNA-binding	7812	ENSG00000009307
CCNA2	NA	CCNA2	cyclin A2	890	ENSG00000145386
ASAP2	NA	ASAP2	ArfGAP with SH3 domain, ankyrin repeat and PH domain 2	8853	ENSG00000151693
PLAU	NA	PLAU	plasminogen activator, urokinase	5328	ENSG00000122861
SHC1	NA	SHC1	SHC (Src homology 2 domain containing) transforming protein 1	6464	ENSG00000160691
UBE2D1	NA	UBE2D1	ubiquitin-conjugating enzyme E2D 1	7321	ENSG00000072401
CASP8	NA	CASP8	caspase 8, apoptosis-related cysteine peptidase	841	ENSG00000064012
SNAI2	NA	SNAI2	snail homolog 2 (Drosophila)	6591	ENSG00000019549
ITSN1	NA	ITSN1	intersectin 1 (SH3 domain protein)	6453	ENSG00000205726
SP5	NA	SP5	Sp5 transcription factor	389058	ENSG00000204335
PDGFRB	NA	PDGFRB	platelet-derived growth factor receptor, beta polypeptide	5159	ENSG00000113721
PTPRK	NA	PTPRK	protein tyrosine phosphatase, receptor type, K	5796	ENSG00000152894
USO1	NA	USO1	USO1 vesicle docking protein homolog (yeast)	8615	ENSG00000138768
GJA1	NA	GJA1	gap junction protein, alpha 1, 43kDa	2697	ENSG00000152661
RIPK2	NA	RIPK2	receptor-interacting serine-threonine kinase 2	8767	ENSG00000104312
RNF144B	NA	RNF144B	ring finger protein 144B	255488	ENSG00000137393
NCL	NA	NCL	nucleolin	4691	ENSG00000115053
IL10	NA	IL10	interleukin 10	3586	ENSG00000136634
SMYD2	NA	SMYD2	SET and MYND domain containing 2	56950	ENSG00000143499
SESN1	NA	SESN1	sestrin 1	27244	ENSG00000080546
MAP3K6	NA	MAP3K6	mitogen-activated protein kinase kinase kinase 6	9064	ENSG00000142733
SH3GL1	NA	SH3GL1	SH3-domain GRB2-like 1	6455	ENSG00000141985
ITGB2	NA	ITGB2	integrin, beta 2 (complement component 3 receptor 3 and 4 subunit)	3689	ENSG00000160255
PPP2CA	NA	PPP2CA	protein phosphatase 2, catalytic subunit, alpha isozyme	5515	ENSG00000113575
RBL1	NA	RBL1	retinoblastoma-like 1 (p107)	5933	ENSG00000080839
AREG	NA	AREG	amphiregulin	374	ENSG00000109321
KLF4	NA	KLF4	Kruppel-like factor 4 (gut)	9314	ENSG00000136826
PTMA	NA	PTMA	prothymosin, alpha	5757	ENSG00000187514
NCK2	NA	NCK2	NCK adaptor protein 2	8440	ENSG00000071051
GSK3B	NA	GSK3B	glycogen synthase kinase 3 beta	2932	ENSG00000082701
RCAN2	NA	RCAN2	regulator of calcineurin 2	10231	ENSG00000172348
HGF	NA	HGF	hepatocyte growth factor (hepapoietin A; scatter factor)	3082	ENSG00000019991
SMAD1	NA	SMAD1	SMAD family member 1	4086	ENSG00000170365
CTDSP1	NA	CTDSP1	CTD (carboxy-terminal domain, RNA polymerase II, polypeptide A) small phosphatase 1	58190	ENSG00000144579
MAPK12	NA	MAPK12	mitogen-activated protein kinase 12	6300	ENSG00000188130
TNIK	NA	TNIK	TRAF2 and NCK interacting kinase	23043	ENSG00000154310
FN1	NA	FN1	fibronectin 1	2335	ENSG00000115414
EGR1	NA	EGR1	early growth response 1	1958	ENSG00000120738
TFF3	NA	TFF3	trefoil factor 3 (intestinal)	7033	ENSG00000160180
LNPEP	NA	LNPEP	leucyl/cystinyl aminopeptidase	4012	ENSG00000113441
CCM2	NA	CCM2	cerebral cavernous malformation 2	83605	ENSG00000136280
SDC2	NA	SDC2	syndecan 2	6383	ENSG00000169439
TGFBR1	NA	TGFBR1	transforming growth factor, beta receptor 1	7046	ENSG00000106799
ACTN2	NA	ACTN2	actinin, alpha 2	88	ENSG00000077522
ARF1	NA	ARF1	ADP-ribosylation factor 1	375	ENSG00000143761
PPP3CB	NA	PPP3CB	protein phosphatase 3, catalytic subunit, beta isozyme	5532	ENSG00000107758
MLH1	NA	MLH1	mutL homolog 1, colon cancer, nonpolyposis type 2 (E. coli)	4292	ENSG00000076242
SFXN3	NA	SFXN3	sideroflexin 3	81855	ENSG00000107819
BMP6	NA	BMP6	bone morphogenetic protein 6	654	ENSG00000153162
JMY	NA	JMY	junction mediating and regulatory protein, p53 cofactor	133746	ENSG00000152409
CFLAR	NA	CFLAR	CASP8 and FADD-like apoptosis regulator	8837	ENSG00000003402
GDI1	NA	GDI1	GDP dissociation inhibitor 1	2664	ENSG00000203879
PRKCE	NA	PRKCE	protein kinase C, epsilon	5581	ENSG00000171132
JUN	NA	JUN	jun proto-oncogene	3725	ENSG00000177606
FKBP1A	NA	FKBP1A	FK506 binding protein 1A, 12kDa	2280	ENSG00000088832
CAPN2	NA	CAPN2	calpain 2, (m/II) large subunit	824	ENSG00000162909
PTPN1	NA	PTPN1	protein tyrosine phosphatase, non-receptor type 1	5770	ENSG00000196396
VASP	NA	VASP	vasodilator-stimulated phosphoprotein	7408	ENSG00000125753
DAB2	NA	DAB2	disabled homolog 2, mitogen-responsive phosphoprotein (Drosophila)	1601	ENSG00000153071
TIMP1	NA	TIMP1	TIMP metallopeptidase inhibitor 1	7076	ENSG00000102265
GATA2	NA	GATA2	GATA binding protein 2	2624	ENSG00000179348
ARPC5	NA	ARPC5	actin related protein 2/3 complex, subunit 5, 16kDa	10092	ENSG00000162704
HUWE1	NA	HUWE1	HECT, UBA and WWE domain containing 1, E3 ubiquitin protein ligase	10075	ENSG00000086758
SETD8	NA	SETD8	SET domain containing (lysine methyltransferase) 8	387893	ENSG00000183955
CCND3	NA	CCND3	cyclin D3	896	ENSG00000112576
PRKG1	NA	PRKG1	protein kinase, cGMP-dependent, type I	5592	ENSG00000185532
BAX	NA	BAX	BCL2-associated X protein	581	ENSG00000087088
DCP1A	NA	DCP1A	DCP1 decapping enzyme homolog A (S. cerevisiae)	55802	NULL
LSP1	NA	LSP1	lymphocyte-specific protein 1	4046	ENSG00000130592
WWP1	NA	WWP1	WW domain containing E3 ubiquitin protein ligase 1	11059	ENSG00000123124
CXCL12	NA	CXCL12	chemokine (C-X-C motif) ligand 12	6387	ENSG00000107562
GNAI2	NA	GNAI2	guanine nucleotide binding protein (G protein), alpha inhibiting activity polypeptide 2	2771	ENSG00000114353
NCOA2	NA	NCOA2	nuclear receptor coactivator 2	10499	ENSG00000140396
KDELR1	NA	KDELR1	KDEL (Lys-Asp-Glu-Leu) endoplasmic reticulum protein retention receptor 1	10945	ENSG00000105438
TGFB1	NA	TGFB1	transforming growth factor, beta 1	7040	ENSG00000105329
HES1	NA	HES1	hairy and enhancer of split 1, (Drosophila)	3280	ENSG00000114315
IL17RD	NA	IL17RD	interleukin 17 receptor D	54756	ENSG00000144730
CDC25A	NA	CDC25A	cell division cycle 25 homolog A (S. pombe)	993	ENSG00000164045
PPP3CA	NA	PPP3CA	protein phosphatase 3, catalytic subunit, alpha isozyme	5530	ENSG00000138814
FOXO4	NA	FOXO4	forkhead box O4	4303	ENSG00000184481
LAMC1	NA	LAMC1	laminin, gamma 1 (formerly LAMB2)	3915	ENSG00000135862
TNFAIP3	NA	TNFAIP3	tumor necrosis factor, alpha-induced protein 3	7128	ENSG00000118503
RBBP7	NA	RBBP7	retinoblastoma binding protein 7	5931	ENSG00000102054
RB1CC1	NA	RB1CC1	RB1-inducible coiled-coil 1	9821	ENSG00000023287
PLAUR	NA	PLAUR	plasminogen activator, urokinase receptor	5329	ENSG00000011422
PIK3R1	NA	PIK3R1	phosphoinositide-3-kinase, regulatory subunit 1 (alpha)	5295	ENSG00000145675
SKP2	NA	SKP2	S-phase kinase-associated protein 2, E3 ubiquitin protein ligase	6502	ENSG00000145604
HMGCS2	NA	HMGCS2	3-hydroxy-3-methylglutaryl-CoA synthase 2 (mitochondrial)	3158	ENSG00000134240
PRDM1	NA	PRDM1	PR domain containing 1, with ZNF domain	639	ENSG00000057657
HSPA1B	NA	HSPA1B	heat shock 70kDa protein 1B	3304	ENSG00000204388
BCL10	NA	BCL10	B-cell CLL/lymphoma 10	8915	ENSG00000142867
GPLD1	NA	GPLD1	glycosylphosphatidylinositol specific phospholipase D1	2822	ENSG00000112293
IFNA21	NA	IFNA21	interferon, alpha 21	3452	ENSG00000137080
TSC1	NA	TSC1	tuberous sclerosis 1	7248	ENSG00000165699
GNA12	NA	GNA12	guanine nucleotide binding protein (G protein) alpha 12	2768	ENSG00000146535
CXCR4	NA	CXCR4	chemokine (C-X-C motif) receptor 4	7852	ENSG00000121966
ELMO1	NA	ELMO1	engulfment and cell motility 1	9844	ENSG00000155849
PRDX3	NA	PRDX3	peroxiredoxin 3	10935	ENSG00000165672
NCOA4	NA	NCOA4	nuclear receptor coactivator 4	8031	ENSG00000138293
AKT3	NA	AKT3	v-akt murine thymoma viral oncogene homolog 3 (protein kinase B, gamma)	10000	ENSG00000117020
CAMK2B	NA	CAMK2B	calcium/calmodulin-dependent protein kinase II beta	816	ENSG00000058404
TADA2B	NA	TADA2B	transcriptional adaptor 2B	93624	ENSG00000173011
SVIL	NA	SVIL	supervillin	6840	ENSG00000197321
COL1A2	NA	COL1A2	collagen, type I, alpha 2	1278	ENSG00000164692
ITGAV	NA	ITGAV	integrin, alpha V	3685	ENSG00000138448
ARPC2	NA	ARPC2	actin related protein 2/3 complex, subunit 2, 34kDa	10109	ENSG00000163466
JAK3	NA	JAK3	Janus kinase 3	3718	ENSG00000105639
BTRC	NA	BTRC	beta-transducin repeat containing E3 ubiquitin protein ligase	8945	ENSG00000166167
Pathway Commons pathway	Signaling events mediated by VEGFR1 and VEGFR2	DB_ID:1516
C=1296;O=118;E=39.13;R=3.02;rawP=1.63e-26;adjP=7.07e-25
KDR	NA	KDR	kinase insert domain receptor (a type III receptor tyrosine kinase)	3791	ENSG00000128052
SUMO2	NA	SUMO2	SMT3 suppressor of mif two 3 homolog 2 (S. cerevisiae)	6613	ENSG00000188612
EGF	NA	EGF	epidermal growth factor	1950	ENSG00000138798
PBX1	NA	PBX1	pre-B-cell leukemia homeobox 1	5087	ENSG00000185630
COL18A1	NA	COL18A1	collagen, type XVIII, alpha 1	80781	ENSG00000182871
IL13RA1	NA	IL13RA1	interleukin 13 receptor, alpha 1	3597	ENSG00000131724
LYN	NA	LYN	v-yes-1 Yamaguchi sarcoma viral related oncogene homolog	4067	ENSG00000254087
AIFM2	NA	AIFM2	apoptosis-inducing factor, mitochondrion-associated, 2	84883	ENSG00000042286
HSPA1A	NA	HSPA1A	heat shock 70kDa protein 1A	3303	ENSG00000204389
RPL11	NA	RPL11	ribosomal protein L11	6135	ENSG00000142676
CSDE1	NA	CSDE1	cold shock domain containing E1, RNA-binding	7812	ENSG00000009307
CCNA2	NA	CCNA2	cyclin A2	890	ENSG00000145386
ASAP2	NA	ASAP2	ArfGAP with SH3 domain, ankyrin repeat and PH domain 2	8853	ENSG00000151693
PLAU	NA	PLAU	plasminogen activator, urokinase	5328	ENSG00000122861
SHC1	NA	SHC1	SHC (Src homology 2 domain containing) transforming protein 1	6464	ENSG00000160691
UBE2D1	NA	UBE2D1	ubiquitin-conjugating enzyme E2D 1	7321	ENSG00000072401
CASP8	NA	CASP8	caspase 8, apoptosis-related cysteine peptidase	841	ENSG00000064012
SNAI2	NA	SNAI2	snail homolog 2 (Drosophila)	6591	ENSG00000019549
ITSN1	NA	ITSN1	intersectin 1 (SH3 domain protein)	6453	ENSG00000205726
SP5	NA	SP5	Sp5 transcription factor	389058	ENSG00000204335
PDGFRB	NA	PDGFRB	platelet-derived growth factor receptor, beta polypeptide	5159	ENSG00000113721
PTPRK	NA	PTPRK	protein tyrosine phosphatase, receptor type, K	5796	ENSG00000152894
USO1	NA	USO1	USO1 vesicle docking protein homolog (yeast)	8615	ENSG00000138768
GJA1	NA	GJA1	gap junction protein, alpha 1, 43kDa	2697	ENSG00000152661
RIPK2	NA	RIPK2	receptor-interacting serine-threonine kinase 2	8767	ENSG00000104312
RNF144B	NA	RNF144B	ring finger protein 144B	255488	ENSG00000137393
HSP90AB1	NA	HSP90AB1	heat shock protein 90kDa alpha (cytosolic), class B member 1	3326	ENSG00000096384
NCL	NA	NCL	nucleolin	4691	ENSG00000115053
IL10	NA	IL10	interleukin 10	3586	ENSG00000136634
SMYD2	NA	SMYD2	SET and MYND domain containing 2	56950	ENSG00000143499
SESN1	NA	SESN1	sestrin 1	27244	ENSG00000080546
MAP3K6	NA	MAP3K6	mitogen-activated protein kinase kinase kinase 6	9064	ENSG00000142733
SH3GL1	NA	SH3GL1	SH3-domain GRB2-like 1	6455	ENSG00000141985
ITGB2	NA	ITGB2	integrin, beta 2 (complement component 3 receptor 3 and 4 subunit)	3689	ENSG00000160255
PPP2CA	NA	PPP2CA	protein phosphatase 2, catalytic subunit, alpha isozyme	5515	ENSG00000113575
RBL1	NA	RBL1	retinoblastoma-like 1 (p107)	5933	ENSG00000080839
KLF4	NA	KLF4	Kruppel-like factor 4 (gut)	9314	ENSG00000136826
PTMA	NA	PTMA	prothymosin, alpha	5757	ENSG00000187514
NCK2	NA	NCK2	NCK adaptor protein 2	8440	ENSG00000071051
GSK3B	NA	GSK3B	glycogen synthase kinase 3 beta	2932	ENSG00000082701
RCAN2	NA	RCAN2	regulator of calcineurin 2	10231	ENSG00000172348
HGF	NA	HGF	hepatocyte growth factor (hepapoietin A; scatter factor)	3082	ENSG00000019991
SMAD1	NA	SMAD1	SMAD family member 1	4086	ENSG00000170365
CTDSP1	NA	CTDSP1	CTD (carboxy-terminal domain, RNA polymerase II, polypeptide A) small phosphatase 1	58190	ENSG00000144579
MAPK12	NA	MAPK12	mitogen-activated protein kinase 12	6300	ENSG00000188130
TNIK	NA	TNIK	TRAF2 and NCK interacting kinase	23043	ENSG00000154310
FN1	NA	FN1	fibronectin 1	2335	ENSG00000115414
EGR1	NA	EGR1	early growth response 1	1958	ENSG00000120738
TFF3	NA	TFF3	trefoil factor 3 (intestinal)	7033	ENSG00000160180
LNPEP	NA	LNPEP	leucyl/cystinyl aminopeptidase	4012	ENSG00000113441
CCM2	NA	CCM2	cerebral cavernous malformation 2	83605	ENSG00000136280
SDC2	NA	SDC2	syndecan 2	6383	ENSG00000169439
TGFBR1	NA	TGFBR1	transforming growth factor, beta receptor 1	7046	ENSG00000106799
ACTN2	NA	ACTN2	actinin, alpha 2	88	ENSG00000077522
ARF1	NA	ARF1	ADP-ribosylation factor 1	375	ENSG00000143761
PPP3CB	NA	PPP3CB	protein phosphatase 3, catalytic subunit, beta isozyme	5532	ENSG00000107758
MLH1	NA	MLH1	mutL homolog 1, colon cancer, nonpolyposis type 2 (E. coli)	4292	ENSG00000076242
SFXN3	NA	SFXN3	sideroflexin 3	81855	ENSG00000107819
BMP6	NA	BMP6	bone morphogenetic protein 6	654	ENSG00000153162
JMY	NA	JMY	junction mediating and regulatory protein, p53 cofactor	133746	ENSG00000152409
CFLAR	NA	CFLAR	CASP8 and FADD-like apoptosis regulator	8837	ENSG00000003402
GDI1	NA	GDI1	GDP dissociation inhibitor 1	2664	ENSG00000203879
PRKCE	NA	PRKCE	protein kinase C, epsilon	5581	ENSG00000171132
JUN	NA	JUN	jun proto-oncogene	3725	ENSG00000177606
FKBP1A	NA	FKBP1A	FK506 binding protein 1A, 12kDa	2280	ENSG00000088832
CAPN2	NA	CAPN2	calpain 2, (m/II) large subunit	824	ENSG00000162909
PTPN1	NA	PTPN1	protein tyrosine phosphatase, non-receptor type 1	5770	ENSG00000196396
VASP	NA	VASP	vasodilator-stimulated phosphoprotein	7408	ENSG00000125753
DAB2	NA	DAB2	disabled homolog 2, mitogen-responsive phosphoprotein (Drosophila)	1601	ENSG00000153071
TIMP1	NA	TIMP1	TIMP metallopeptidase inhibitor 1	7076	ENSG00000102265
GATA2	NA	GATA2	GATA binding protein 2	2624	ENSG00000179348
ARPC5	NA	ARPC5	actin related protein 2/3 complex, subunit 5, 16kDa	10092	ENSG00000162704
HUWE1	NA	HUWE1	HECT, UBA and WWE domain containing 1, E3 ubiquitin protein ligase	10075	ENSG00000086758
SETD8	NA	SETD8	SET domain containing (lysine methyltransferase) 8	387893	ENSG00000183955
CCND3	NA	CCND3	cyclin D3	896	ENSG00000112576
PRKG1	NA	PRKG1	protein kinase, cGMP-dependent, type I	5592	ENSG00000185532
BAX	NA	BAX	BCL2-associated X protein	581	ENSG00000087088
DCP1A	NA	DCP1A	DCP1 decapping enzyme homolog A (S. cerevisiae)	55802	NULL
LSP1	NA	LSP1	lymphocyte-specific protein 1	4046	ENSG00000130592
WWP1	NA	WWP1	WW domain containing E3 ubiquitin protein ligase 1	11059	ENSG00000123124
CXCL12	NA	CXCL12	chemokine (C-X-C motif) ligand 12	6387	ENSG00000107562
GNAI2	NA	GNAI2	guanine nucleotide binding protein (G protein), alpha inhibiting activity polypeptide 2	2771	ENSG00000114353
NCOA2	NA	NCOA2	nuclear receptor coactivator 2	10499	ENSG00000140396
KDELR1	NA	KDELR1	KDEL (Lys-Asp-Glu-Leu) endoplasmic reticulum protein retention receptor 1	10945	ENSG00000105438
TGFB1	NA	TGFB1	transforming growth factor, beta 1	7040	ENSG00000105329
HES1	NA	HES1	hairy and enhancer of split 1, (Drosophila)	3280	ENSG00000114315
IL17RD	NA	IL17RD	interleukin 17 receptor D	54756	ENSG00000144730
CDC25A	NA	CDC25A	cell division cycle 25 homolog A (S. pombe)	993	ENSG00000164045
PPP3CA	NA	PPP3CA	protein phosphatase 3, catalytic subunit, alpha isozyme	5530	ENSG00000138814
FOXO4	NA	FOXO4	forkhead box O4	4303	ENSG00000184481
LAMC1	NA	LAMC1	laminin, gamma 1 (formerly LAMB2)	3915	ENSG00000135862
TNFAIP3	NA	TNFAIP3	tumor necrosis factor, alpha-induced protein 3	7128	ENSG00000118503
RBBP7	NA	RBBP7	retinoblastoma binding protein 7	5931	ENSG00000102054
RB1CC1	NA	RB1CC1	RB1-inducible coiled-coil 1	9821	ENSG00000023287
PLAUR	NA	PLAUR	plasminogen activator, urokinase receptor	5329	ENSG00000011422
PIK3R1	NA	PIK3R1	phosphoinositide-3-kinase, regulatory subunit 1 (alpha)	5295	ENSG00000145675
SKP2	NA	SKP2	S-phase kinase-associated protein 2, E3 ubiquitin protein ligase	6502	ENSG00000145604
HMGCS2	NA	HMGCS2	3-hydroxy-3-methylglutaryl-CoA synthase 2 (mitochondrial)	3158	ENSG00000134240
PRDM1	NA	PRDM1	PR domain containing 1, with ZNF domain	639	ENSG00000057657
HSPA1B	NA	HSPA1B	heat shock 70kDa protein 1B	3304	ENSG00000204388
BCL10	NA	BCL10	B-cell CLL/lymphoma 10	8915	ENSG00000142867
GPLD1	NA	GPLD1	glycosylphosphatidylinositol specific phospholipase D1	2822	ENSG00000112293
IFNA21	NA	IFNA21	interferon, alpha 21	3452	ENSG00000137080
TSC1	NA	TSC1	tuberous sclerosis 1	7248	ENSG00000165699
GNA12	NA	GNA12	guanine nucleotide binding protein (G protein) alpha 12	2768	ENSG00000146535
CXCR4	NA	CXCR4	chemokine (C-X-C motif) receptor 4	7852	ENSG00000121966
ELMO1	NA	ELMO1	engulfment and cell motility 1	9844	ENSG00000155849
PRDX3	NA	PRDX3	peroxiredoxin 3	10935	ENSG00000165672
NCOA4	NA	NCOA4	nuclear receptor coactivator 4	8031	ENSG00000138293
AKT3	NA	AKT3	v-akt murine thymoma viral oncogene homolog 3 (protein kinase B, gamma)	10000	ENSG00000117020
CAMK2B	NA	CAMK2B	calcium/calmodulin-dependent protein kinase II beta	816	ENSG00000058404
TADA2B	NA	TADA2B	transcriptional adaptor 2B	93624	ENSG00000173011
SVIL	NA	SVIL	supervillin	6840	ENSG00000197321
COL1A2	NA	COL1A2	collagen, type I, alpha 2	1278	ENSG00000164692
ITGAV	NA	ITGAV	integrin, alpha V	3685	ENSG00000138448
ARPC2	NA	ARPC2	actin related protein 2/3 complex, subunit 2, 34kDa	10109	ENSG00000163466
JAK3	NA	JAK3	Janus kinase 3	3718	ENSG00000105639
BTRC	NA	BTRC	beta-transducin repeat containing E3 ubiquitin protein ligase	8945	ENSG00000166167
Pathway Commons pathway	IFN-gamma pathway	DB_ID:1529
C=1296;O=118;E=39.13;R=3.02;rawP=1.63e-26;adjP=7.07e-25
KDR	NA	KDR	kinase insert domain receptor (a type III receptor tyrosine kinase)	3791	ENSG00000128052
SUMO2	NA	SUMO2	SMT3 suppressor of mif two 3 homolog 2 (S. cerevisiae)	6613	ENSG00000188612
EGF	NA	EGF	epidermal growth factor	1950	ENSG00000138798
PBX1	NA	PBX1	pre-B-cell leukemia homeobox 1	5087	ENSG00000185630
COL18A1	NA	COL18A1	collagen, type XVIII, alpha 1	80781	ENSG00000182871
IL13RA1	NA	IL13RA1	interleukin 13 receptor, alpha 1	3597	ENSG00000131724
LYN	NA	LYN	v-yes-1 Yamaguchi sarcoma viral related oncogene homolog	4067	ENSG00000254087
AIFM2	NA	AIFM2	apoptosis-inducing factor, mitochondrion-associated, 2	84883	ENSG00000042286
HSPA1A	NA	HSPA1A	heat shock 70kDa protein 1A	3303	ENSG00000204389
RPL11	NA	RPL11	ribosomal protein L11	6135	ENSG00000142676
CSDE1	NA	CSDE1	cold shock domain containing E1, RNA-binding	7812	ENSG00000009307
CCNA2	NA	CCNA2	cyclin A2	890	ENSG00000145386
ASAP2	NA	ASAP2	ArfGAP with SH3 domain, ankyrin repeat and PH domain 2	8853	ENSG00000151693
PLAU	NA	PLAU	plasminogen activator, urokinase	5328	ENSG00000122861
SHC1	NA	SHC1	SHC (Src homology 2 domain containing) transforming protein 1	6464	ENSG00000160691
UBE2D1	NA	UBE2D1	ubiquitin-conjugating enzyme E2D 1	7321	ENSG00000072401
CASP8	NA	CASP8	caspase 8, apoptosis-related cysteine peptidase	841	ENSG00000064012
SNAI2	NA	SNAI2	snail homolog 2 (Drosophila)	6591	ENSG00000019549
ITSN1	NA	ITSN1	intersectin 1 (SH3 domain protein)	6453	ENSG00000205726
SP5	NA	SP5	Sp5 transcription factor	389058	ENSG00000204335
PDGFRB	NA	PDGFRB	platelet-derived growth factor receptor, beta polypeptide	5159	ENSG00000113721
PTPRK	NA	PTPRK	protein tyrosine phosphatase, receptor type, K	5796	ENSG00000152894
USO1	NA	USO1	USO1 vesicle docking protein homolog (yeast)	8615	ENSG00000138768
GJA1	NA	GJA1	gap junction protein, alpha 1, 43kDa	2697	ENSG00000152661
RIPK2	NA	RIPK2	receptor-interacting serine-threonine kinase 2	8767	ENSG00000104312
RNF144B	NA	RNF144B	ring finger protein 144B	255488	ENSG00000137393
NCL	NA	NCL	nucleolin	4691	ENSG00000115053
IL10	NA	IL10	interleukin 10	3586	ENSG00000136634
SMYD2	NA	SMYD2	SET and MYND domain containing 2	56950	ENSG00000143499
SESN1	NA	SESN1	sestrin 1	27244	ENSG00000080546
MAP3K6	NA	MAP3K6	mitogen-activated protein kinase kinase kinase 6	9064	ENSG00000142733
SH3GL1	NA	SH3GL1	SH3-domain GRB2-like 1	6455	ENSG00000141985
ITGB2	NA	ITGB2	integrin, beta 2 (complement component 3 receptor 3 and 4 subunit)	3689	ENSG00000160255
PPP2CA	NA	PPP2CA	protein phosphatase 2, catalytic subunit, alpha isozyme	5515	ENSG00000113575
RBL1	NA	RBL1	retinoblastoma-like 1 (p107)	5933	ENSG00000080839
KLF4	NA	KLF4	Kruppel-like factor 4 (gut)	9314	ENSG00000136826
PTMA	NA	PTMA	prothymosin, alpha	5757	ENSG00000187514
NCK2	NA	NCK2	NCK adaptor protein 2	8440	ENSG00000071051
GSK3B	NA	GSK3B	glycogen synthase kinase 3 beta	2932	ENSG00000082701
RCAN2	NA	RCAN2	regulator of calcineurin 2	10231	ENSG00000172348
HGF	NA	HGF	hepatocyte growth factor (hepapoietin A; scatter factor)	3082	ENSG00000019991
SMAD1	NA	SMAD1	SMAD family member 1	4086	ENSG00000170365
CTDSP1	NA	CTDSP1	CTD (carboxy-terminal domain, RNA polymerase II, polypeptide A) small phosphatase 1	58190	ENSG00000144579
MAPK12	NA	MAPK12	mitogen-activated protein kinase 12	6300	ENSG00000188130
TNIK	NA	TNIK	TRAF2 and NCK interacting kinase	23043	ENSG00000154310
FN1	NA	FN1	fibronectin 1	2335	ENSG00000115414
EGR1	NA	EGR1	early growth response 1	1958	ENSG00000120738
TFF3	NA	TFF3	trefoil factor 3 (intestinal)	7033	ENSG00000160180
LNPEP	NA	LNPEP	leucyl/cystinyl aminopeptidase	4012	ENSG00000113441
CCM2	NA	CCM2	cerebral cavernous malformation 2	83605	ENSG00000136280
SDC2	NA	SDC2	syndecan 2	6383	ENSG00000169439
TGFBR1	NA	TGFBR1	transforming growth factor, beta receptor 1	7046	ENSG00000106799
ACTN2	NA	ACTN2	actinin, alpha 2	88	ENSG00000077522
ARF1	NA	ARF1	ADP-ribosylation factor 1	375	ENSG00000143761
PPP3CB	NA	PPP3CB	protein phosphatase 3, catalytic subunit, beta isozyme	5532	ENSG00000107758
MLH1	NA	MLH1	mutL homolog 1, colon cancer, nonpolyposis type 2 (E. coli)	4292	ENSG00000076242
SFXN3	NA	SFXN3	sideroflexin 3	81855	ENSG00000107819
BMP6	NA	BMP6	bone morphogenetic protein 6	654	ENSG00000153162
JMY	NA	JMY	junction mediating and regulatory protein, p53 cofactor	133746	ENSG00000152409
CFLAR	NA	CFLAR	CASP8 and FADD-like apoptosis regulator	8837	ENSG00000003402
GDI1	NA	GDI1	GDP dissociation inhibitor 1	2664	ENSG00000203879
PRKCE	NA	PRKCE	protein kinase C, epsilon	5581	ENSG00000171132
JUN	NA	JUN	jun proto-oncogene	3725	ENSG00000177606
FKBP1A	NA	FKBP1A	FK506 binding protein 1A, 12kDa	2280	ENSG00000088832
CAPN2	NA	CAPN2	calpain 2, (m/II) large subunit	824	ENSG00000162909
PTPN1	NA	PTPN1	protein tyrosine phosphatase, non-receptor type 1	5770	ENSG00000196396
VASP	NA	VASP	vasodilator-stimulated phosphoprotein	7408	ENSG00000125753
DAB2	NA	DAB2	disabled homolog 2, mitogen-responsive phosphoprotein (Drosophila)	1601	ENSG00000153071
TIMP1	NA	TIMP1	TIMP metallopeptidase inhibitor 1	7076	ENSG00000102265
GATA2	NA	GATA2	GATA binding protein 2	2624	ENSG00000179348
ARPC5	NA	ARPC5	actin related protein 2/3 complex, subunit 5, 16kDa	10092	ENSG00000162704
HUWE1	NA	HUWE1	HECT, UBA and WWE domain containing 1, E3 ubiquitin protein ligase	10075	ENSG00000086758
SETD8	NA	SETD8	SET domain containing (lysine methyltransferase) 8	387893	ENSG00000183955
CCND3	NA	CCND3	cyclin D3	896	ENSG00000112576
PRKG1	NA	PRKG1	protein kinase, cGMP-dependent, type I	5592	ENSG00000185532
DAPK1	NA	DAPK1	death-associated protein kinase 1	1612	ENSG00000196730
BAX	NA	BAX	BCL2-associated X protein	581	ENSG00000087088
DCP1A	NA	DCP1A	DCP1 decapping enzyme homolog A (S. cerevisiae)	55802	NULL
LSP1	NA	LSP1	lymphocyte-specific protein 1	4046	ENSG00000130592
WWP1	NA	WWP1	WW domain containing E3 ubiquitin protein ligase 1	11059	ENSG00000123124
CXCL12	NA	CXCL12	chemokine (C-X-C motif) ligand 12	6387	ENSG00000107562
GNAI2	NA	GNAI2	guanine nucleotide binding protein (G protein), alpha inhibiting activity polypeptide 2	2771	ENSG00000114353
NCOA2	NA	NCOA2	nuclear receptor coactivator 2	10499	ENSG00000140396
KDELR1	NA	KDELR1	KDEL (Lys-Asp-Glu-Leu) endoplasmic reticulum protein retention receptor 1	10945	ENSG00000105438
TGFB1	NA	TGFB1	transforming growth factor, beta 1	7040	ENSG00000105329
HES1	NA	HES1	hairy and enhancer of split 1, (Drosophila)	3280	ENSG00000114315
IL17RD	NA	IL17RD	interleukin 17 receptor D	54756	ENSG00000144730
CDC25A	NA	CDC25A	cell division cycle 25 homolog A (S. pombe)	993	ENSG00000164045
PPP3CA	NA	PPP3CA	protein phosphatase 3, catalytic subunit, alpha isozyme	5530	ENSG00000138814
FOXO4	NA	FOXO4	forkhead box O4	4303	ENSG00000184481
LAMC1	NA	LAMC1	laminin, gamma 1 (formerly LAMB2)	3915	ENSG00000135862
TNFAIP3	NA	TNFAIP3	tumor necrosis factor, alpha-induced protein 3	7128	ENSG00000118503
RBBP7	NA	RBBP7	retinoblastoma binding protein 7	5931	ENSG00000102054
RB1CC1	NA	RB1CC1	RB1-inducible coiled-coil 1	9821	ENSG00000023287
PLAUR	NA	PLAUR	plasminogen activator, urokinase receptor	5329	ENSG00000011422
PIK3R1	NA	PIK3R1	phosphoinositide-3-kinase, regulatory subunit 1 (alpha)	5295	ENSG00000145675
SKP2	NA	SKP2	S-phase kinase-associated protein 2, E3 ubiquitin protein ligase	6502	ENSG00000145604
HMGCS2	NA	HMGCS2	3-hydroxy-3-methylglutaryl-CoA synthase 2 (mitochondrial)	3158	ENSG00000134240
PRDM1	NA	PRDM1	PR domain containing 1, with ZNF domain	639	ENSG00000057657
HSPA1B	NA	HSPA1B	heat shock 70kDa protein 1B	3304	ENSG00000204388
BCL10	NA	BCL10	B-cell CLL/lymphoma 10	8915	ENSG00000142867
GPLD1	NA	GPLD1	glycosylphosphatidylinositol specific phospholipase D1	2822	ENSG00000112293
IFNA21	NA	IFNA21	interferon, alpha 21	3452	ENSG00000137080
TSC1	NA	TSC1	tuberous sclerosis 1	7248	ENSG00000165699
GNA12	NA	GNA12	guanine nucleotide binding protein (G protein) alpha 12	2768	ENSG00000146535
CXCR4	NA	CXCR4	chemokine (C-X-C motif) receptor 4	7852	ENSG00000121966
ELMO1	NA	ELMO1	engulfment and cell motility 1	9844	ENSG00000155849
PRDX3	NA	PRDX3	peroxiredoxin 3	10935	ENSG00000165672
NCOA4	NA	NCOA4	nuclear receptor coactivator 4	8031	ENSG00000138293
AKT3	NA	AKT3	v-akt murine thymoma viral oncogene homolog 3 (protein kinase B, gamma)	10000	ENSG00000117020
CAMK2B	NA	CAMK2B	calcium/calmodulin-dependent protein kinase II beta	816	ENSG00000058404
TADA2B	NA	TADA2B	transcriptional adaptor 2B	93624	ENSG00000173011
SVIL	NA	SVIL	supervillin	6840	ENSG00000197321
COL1A2	NA	COL1A2	collagen, type I, alpha 2	1278	ENSG00000164692
ITGAV	NA	ITGAV	integrin, alpha V	3685	ENSG00000138448
ARPC2	NA	ARPC2	actin related protein 2/3 complex, subunit 2, 34kDa	10109	ENSG00000163466
JAK3	NA	JAK3	Janus kinase 3	3718	ENSG00000105639
BTRC	NA	BTRC	beta-transducin repeat containing E3 ubiquitin protein ligase	8945	ENSG00000166167
Pathway Commons pathway	Arf6 downstream pathway	DB_ID:1585
C=1288;O=117;E=38.88;R=3.01;rawP=3.30e-26;adjP=7.39e-25
KDR	NA	KDR	kinase insert domain receptor (a type III receptor tyrosine kinase)	3791	ENSG00000128052
SUMO2	NA	SUMO2	SMT3 suppressor of mif two 3 homolog 2 (S. cerevisiae)	6613	ENSG00000188612
EGF	NA	EGF	epidermal growth factor	1950	ENSG00000138798
PBX1	NA	PBX1	pre-B-cell leukemia homeobox 1	5087	ENSG00000185630
COL18A1	NA	COL18A1	collagen, type XVIII, alpha 1	80781	ENSG00000182871
IL13RA1	NA	IL13RA1	interleukin 13 receptor, alpha 1	3597	ENSG00000131724
LYN	NA	LYN	v-yes-1 Yamaguchi sarcoma viral related oncogene homolog	4067	ENSG00000254087
AIFM2	NA	AIFM2	apoptosis-inducing factor, mitochondrion-associated, 2	84883	ENSG00000042286
HSPA1A	NA	HSPA1A	heat shock 70kDa protein 1A	3303	ENSG00000204389
RPL11	NA	RPL11	ribosomal protein L11	6135	ENSG00000142676
CSDE1	NA	CSDE1	cold shock domain containing E1, RNA-binding	7812	ENSG00000009307
CCNA2	NA	CCNA2	cyclin A2	890	ENSG00000145386
ASAP2	NA	ASAP2	ArfGAP with SH3 domain, ankyrin repeat and PH domain 2	8853	ENSG00000151693
PLAU	NA	PLAU	plasminogen activator, urokinase	5328	ENSG00000122861
SHC1	NA	SHC1	SHC (Src homology 2 domain containing) transforming protein 1	6464	ENSG00000160691
[truncated: 85,519 more rows]

## Sheet: TAB S8
TABLE S8:OVERLAP BETWEEN GSE26887, GSE9128 AND GSE1869 GEO DATASETS
OVERLAP GSE26887/GSE9128 GEO DATASETS	OVERLAP GSE26887/GSE1869 GEO DATASETS	OVERLAP GSE1869/GEO9128 DATASETS	OVERLAP GSE26887/GSE1869/GEO9128 DATASETS
TRAIL signaling pathway	TRAIL signaling pathway	Integrin-linked kinase signaling	TRAIL signaling pathway
IGF1 pathway	IGF1 pathway	Signaling events mediated by focal adhesion kinase	IGF1 pathway
ErbB1 downstream signaling	ErbB1 downstream signaling	IL3-mediated signaling events	ErbB1 downstream signaling
Syndecan-1-mediated signaling events	Syndecan-1-mediated signaling events	LKB1 signaling events	Syndecan-1-mediated signaling events
PDGF receptor signaling network	PDGF receptor signaling network	Integrin family cell surface interactions	PDGF receptor signaling network
S1P1 pathway	S1P1 pathway	EGFR-dependent Endothelin signaling events	S1P1 pathway
Arf6 downstream pathway	Arf6 downstream pathway	Nectin adhesion pathway	Arf6 downstream pathway
Integrin family cell surface interactions	Integrin family cell surface interactions	PDGFR-beta signaling pathway	Integrin family cell surface interactions
Insulin Pathway	Insulin Pathway	mTOR signaling pathway	Insulin Pathway
Proteoglycan syndecan-mediated signaling events	Proteoglycan syndecan-mediated signaling events	GMCSF-mediated signaling events	Proteoglycan syndecan-mediated signaling events
Nectin adhesion pathway	Nectin adhesion pathway	IGF1 pathway	Nectin adhesion pathway
EGFR-dependent Endothelin signaling events	EGFR-dependent Endothelin signaling events	Arf6 trafficking events	EGFR-dependent Endothelin signaling events
Arf6 signaling events	Arf6 signaling events	Glypican 1 network	Arf6 signaling events
IL5-mediated signaling events	IL5-mediated signaling events	ErbB1 downstream signaling	IL5-mediated signaling events
Urokinase-type plasminogen activator (uPA) and uPAR-mediated signaling	Urokinase-type plasminogen activator (uPA) and uPAR-mediated signaling	Insulin Pathway	Urokinase-type plasminogen activator (uPA) and uPAR-mediated signaling
Class I PI3K signaling events mediated by Akt	Class I PI3K signaling events mediated by Akt	Alpha9 beta1 integrin signaling events	Class I PI3K signaling events mediated by Akt
Signaling events mediated by focal adhesion kinase	Signaling events mediated by focal adhesion kinase	Endothelins	Signaling events mediated by focal adhesion kinase
IL3-mediated signaling events	IL3-mediated signaling events	EGF receptor (ErbB1) signaling pathway	IL3-mediated signaling events
Beta1 integrin cell surface interactions	Beta1 integrin cell surface interactions	PAR1-mediated thrombin signaling events	Beta1 integrin cell surface interactions
Arf6 trafficking events	Arf6 trafficking events	CXCR4-mediated signaling events	Arf6 trafficking events
Internalization of ErbB1	Internalization of ErbB1	S1P1 pathway	Internalization of ErbB1
GMCSF-mediated signaling events	GMCSF-mediated signaling events	Signaling events mediated by Hepatocyte Growth Factor Receptor (c-Met)	GMCSF-mediated signaling events
mTOR signaling pathway	mTOR signaling pathway	Class I PI3K signaling events	mTOR signaling pathway
Alpha9 beta1 integrin signaling events	Alpha9 beta1 integrin signaling events	PDGF receptor signaling network	Alpha9 beta1 integrin signaling events
Signaling events mediated by Hepatocyte Growth Factor Receptor (c-Met)	Signaling events mediated by Hepatocyte Growth Factor Receptor (c-Met)	Regulation of CDC42 activity	Signaling events mediated by Hepatocyte Growth Factor Receptor (c-Met)
EGF receptor (ErbB1) signaling pathway	EGF receptor (ErbB1) signaling pathway	Arf6 downstream pathway	EGF receptor (ErbB1) signaling pathway
Plasma membrane estrogen receptor signaling	Plasma membrane estrogen receptor signaling	Proteoglycan syndecan-mediated signaling events	Plasma membrane estrogen receptor signaling
PDGFR-beta signaling pathway	PDGFR-beta signaling pathway	Syndecan-1-mediated signaling events	PDGFR-beta signaling pathway
Endothelins	Endothelins	Signaling events mediated by VEGFR1 and VEGFR2	Endothelins
Class I PI3K signaling events	Class I PI3K signaling events	Internalization of ErbB1	Class I PI3K signaling events
IL1-mediated signaling events	VEGF and VEGFR signaling network	TRAIL signaling pathway	VEGF and VEGFR signaling network
VEGF and VEGFR signaling network	PAR1-mediated thrombin signaling events	Class I PI3K signaling events mediated by Akt	PAR1-mediated thrombin signaling events
PAR1-mediated thrombin signaling events	Thrombin/protease-activated receptor (PAR) pathway	CDC42 signaling events	Thrombin/protease-activated receptor (PAR) pathway
Thrombin/protease-activated receptor (PAR) pathway	Signaling events mediated by VEGFR1 and VEGFR2	Urokinase-type plasminogen activator (uPA) and uPAR-mediated signaling	Signaling events mediated by VEGFR1 and VEGFR2
Signaling events mediated by VEGFR1 and VEGFR2	ErbB receptor signaling network	Beta1 integrin cell surface interactions	ErbB receptor signaling network
ErbB receptor signaling network	IFN-gamma pathway	IFN-gamma pathway	IFN-gamma pathway
IFN-gamma pathway	Glypican 1 network	Arf6 signaling events	Glypican 1 network
Glypican 1 network	Sphingosine 1-phosphate (S1P) pathway	Plasma membrane estrogen receptor signaling	Sphingosine 1-phosphate (S1P) pathway
Sphingosine 1-phosphate (S1P) pathway	LKB1 signaling events	IL5-mediated signaling events	LKB1 signaling events
LKB1 signaling events	Glypican pathway	Sphingosine 1-phosphate (S1P) pathway	Glypican pathway
Glypican pathway	CDC42 signaling events	Thrombin/protease-activated receptor (PAR) pathway	CDC42 signaling events
TNF receptor signaling pathway	Regulation of CDC42 activity	ErbB receptor signaling network	Regulation of CDC42 activity
CDC42 signaling events	Integrin-linked kinase signaling	VEGF and VEGFR signaling network	Integrin-linked kinase signaling
Regulation of CDC42 activity		Glypican pathway
IL6-mediated signaling events		Stabilization and expansion of the E-cadherin adherens junction
Integrin-linked kinase signaling		E-cadherin signaling in the nascent adherens junction
BMP receptor signaling		E-cadherin signaling events
AP-1 transcription factor network		Syndecan-4-mediated signaling events
Regulation of nuclear SMAD2/3 signaling
Regulation of cytoplasmic and nuclear SMAD2/3 signaling
TGF-beta receptor signaling
p38 MAPK signaling pathway
ALK1 signaling events
Interferon gamma signaling
ALK1 pathway
